# Supplementary material for: Synthesis and structure–activity relationship of berkeleylactone A-derived antibiotics
Source: Royal Society of Chemistry journal article supplement (doi:10.1039/d2ob01452a), 2022-01-01

## Supporting Information

### Synthesis and structure-activity relationship of berkeleylactone A-derived antibiotics

Tomáš Malatinský,<sup>a</sup> Dominika Valachová,<sup>a</sup> Lucia Pinčeková,<sup>a</sup> David Scherhauser,<sup>a</sup> Petra Olejníková,<sup>b</sup> Magdaléna Májeková,<sup>c</sup> Jarmila Vargová<sup>d</sup>, Barbora Gaálová-Radochová<sup>d</sup>, Helena Bujdánková,<sup>d</sup> Jana Nováčiková,<sup>e</sup> Alistair J. M. Farley,<sup>f</sup> Dušan Berkeš,<sup>a</sup> Pavol Jakubec,<sup>a</sup> Andrej Kolarovič<sup>g</sup> and Oľga Caletková <sup>\*a</sup>

---

<sup>a</sup>Institute of Organic Chemistry, Catalysis and Petrochemistry, Slovak University of Technology, Radlinského 9, 812 37 Bratislava, Slovakia.

<sup>b</sup>Institute of Biochemistry and Microbiology, Slovak University of Technology, Radlinského 9, 812 37 Bratislava, Slovakia.

<sup>c</sup>Institute of Experimental Pharmacology & Toxicology, Centre of Experimental Medicine SAS, Dúbravská cesta 9, 841 04 Bratislava, Slovakia.

<sup>d</sup>Department of Microbiology and Virology, Faculty of Natural Sciences, Comenius University in Bratislava, Mlynská dolina, Ilkovičova 6, 842 15 Bratislava, Slovakia.

<sup>e</sup>Central Laboratories, Slovak University of Technology, Radlinského 9, 812 37 Bratislava, Slovakia.

<sup>f</sup>The Department of Chemistry, Chemistry Research Laboratory, University of Oxford, Mansfield Road, Oxford OX1 3TA, UK.

<sup>g</sup>Department of Chemistry, Faculty of Education, Trnava University, Priemysel'ná 4, 918 43 Trnava, Slovakia.

---

1. Table 1: Screening of susceptibility of clinical isolate *S. aureus* L12 and standard strain *S. aureus* CCM3953 to different groups of antimicrobial agents using disk diffusion method
2. Table 2: Characteristic <sup>1</sup>H NMR shifts of sulfa-Michael adducts and related compounds.
3. <sup>1</sup>H and <sup>13</sup>C NMR of prepared compounds

Table 1: Screening of susceptibility of clinical isolate *S. aureus* L12 and standard strain *S. aureus* CCM3953 to different groups of antimicrobial agents using disk diffusion method (EUCAST version 11.0) (28).

| <b>Antibiotic agent (Disk content in µg)</b> |                                          | <b>L12</b> | <b>CCM 3953</b> |
|----------------------------------------------|------------------------------------------|------------|-----------------|
| Penicillins                                  | <b>Oxacillin 10µg</b>                    | R          | S               |
|                                              | <b>Ampicillin 10µg</b>                   | R          | S               |
| Cephalosporins                               | <b>Cefotaxime 30µg</b>                   | R          | S               |
|                                              | <b>Cefoxitin 30µg</b>                    | R          | S               |
|                                              | <b>Ceftriaxone 30µg</b>                  | R          | S               |
| Carbapenems                                  | <b>Ertapenem 10µg</b>                    | R          | S               |
| Fluoroquinolones                             | <b>Ciprofloxacin 5µg</b>                 | R          | S               |
|                                              | <b>Ofloxacin 5µg</b>                     | R          | S               |
|                                              | <b>Moxifloxacin 5µg</b>                  | R          | S               |
|                                              | <b>Levofloxacin 5µg</b>                  | R          | S               |
| Aminoglycosides                              | <b>Gentamicin 10µg</b>                   | S          | S               |
|                                              | <b>Tobramycin 10µg</b>                   | R          | S               |
| Glycopeptides                                | <b>Vancomycin 30µg</b>                   | S          | S               |
| Macrolides and lincosamides                  | <b>Erythromycin 15µg</b>                 | R          | S               |
|                                              | <b>Clindamycin 2µg</b>                   | R          | S               |
| Tetracyclines                                | <b>Tetracycline 30µg</b>                 | S          | S               |
|                                              | <b>Doxycycline 30µg</b>                  | S          | S               |
| Oxazolidinones                               | <b>Linezolid 10µg</b>                    | S          | S               |
| Streptogramins                               | <b>Quinupristin-dalfopristin 15µg</b>    | S          | S               |
|                                              | <b>Rifampicine 5µg</b>                   | S          | S               |
| Sulfonamides                                 | <b>Trimethoprim-Sulfamethoxazole 5µg</b> | S          | S               |

S susceptible

R resistant

Table 2: Characteristic  $^1\text{H}$  NMR signals of sulfa-Michael adducts and related compounds (chemical shift, multiplicity and coupling constant in Hertz)

| Compound                      | H2**                                               | H3**                                               |
|-------------------------------|----------------------------------------------------|----------------------------------------------------|
| <b>berkeleylactone A</b>      | 4.03, t (6.6)                                      | 3.23, dd (18.3, 7.4)<br>2.82, dd (18.3, 5.9)       |
| <i>epi</i> -berkeleylactone A | 3.72-3.79, m*                                      | 3.27, dd (19.0, 3.8)<br>3.04-3.15, m*              |
| <b>1</b>                      | 6.79, d (15.8)                                     | 7.25, d (15.8)                                     |
| <b>2a</b>                     | 3.89, dd (7.9, 6.2)                                | 3.34 – 3.17, m*<br>2.79, dd (18.2, 6.0)            |
| <b>2b</b>                     | 3.71, dd (7.5, 5.7)                                | 3.25, dd (18.7, 5.7)<br>3.05, dd (18.8, 8.1)       |
| <b>3a</b>                     | 3.83, dd (9.3, 5.0)                                | 3.30, dd (18.4, 9.3)<br>2.75 – 2.65, m*            |
| <b>3b</b>                     | 3.67, t (7.0)                                      | 3.13, dd (18.6, 6.5)*<br>3.09, dd (18.6, 7.6)*     |
| <b>4a</b>                     | 3.97, dd (9.0, 5.4)                                | 3.27, dd (18.5, 9.1)*<br>2.77, dd (18.4, 5.4)      |
| <b>4b</b>                     | 3.87, "t" (6.8)                                    | 3.18, dd (18.4, 6.3)<br>3.12, dd (18.4, 7.3)       |
| <b>5a</b>                     | 4.64 – 4.56, m*                                    | 3.30, dd (18.4, 6.9)<br>2.85, dd (18.4, 7.2)       |
| <b>5b</b>                     | 4.64 – 4.56, m*                                    | 3.47, dd (18.8, 5.0)<br>2.96, dd (18.7, 4.5)       |
| <b>6</b>                      | 2.79, dt (15.6, 7.4)<br>2.45, ddd (15.6, 7.7, 5.9) | 3.02, dt (18.2, 7.4)<br>2.63, ddd (18.2, 7.6, 5.9) |

\* Overlapping with other signals

\*\* Signals were assigned based on analogy with berkeleylactone A and *epi*-berkeleylactone A

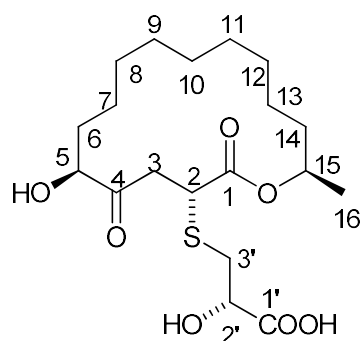

**Berkeleylactone A**

malatinsky0079h\_TM-62-9+10  
malatinsky 0079 TM-62-9+10 1H

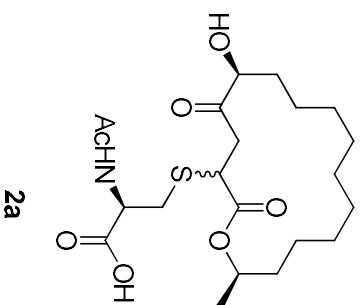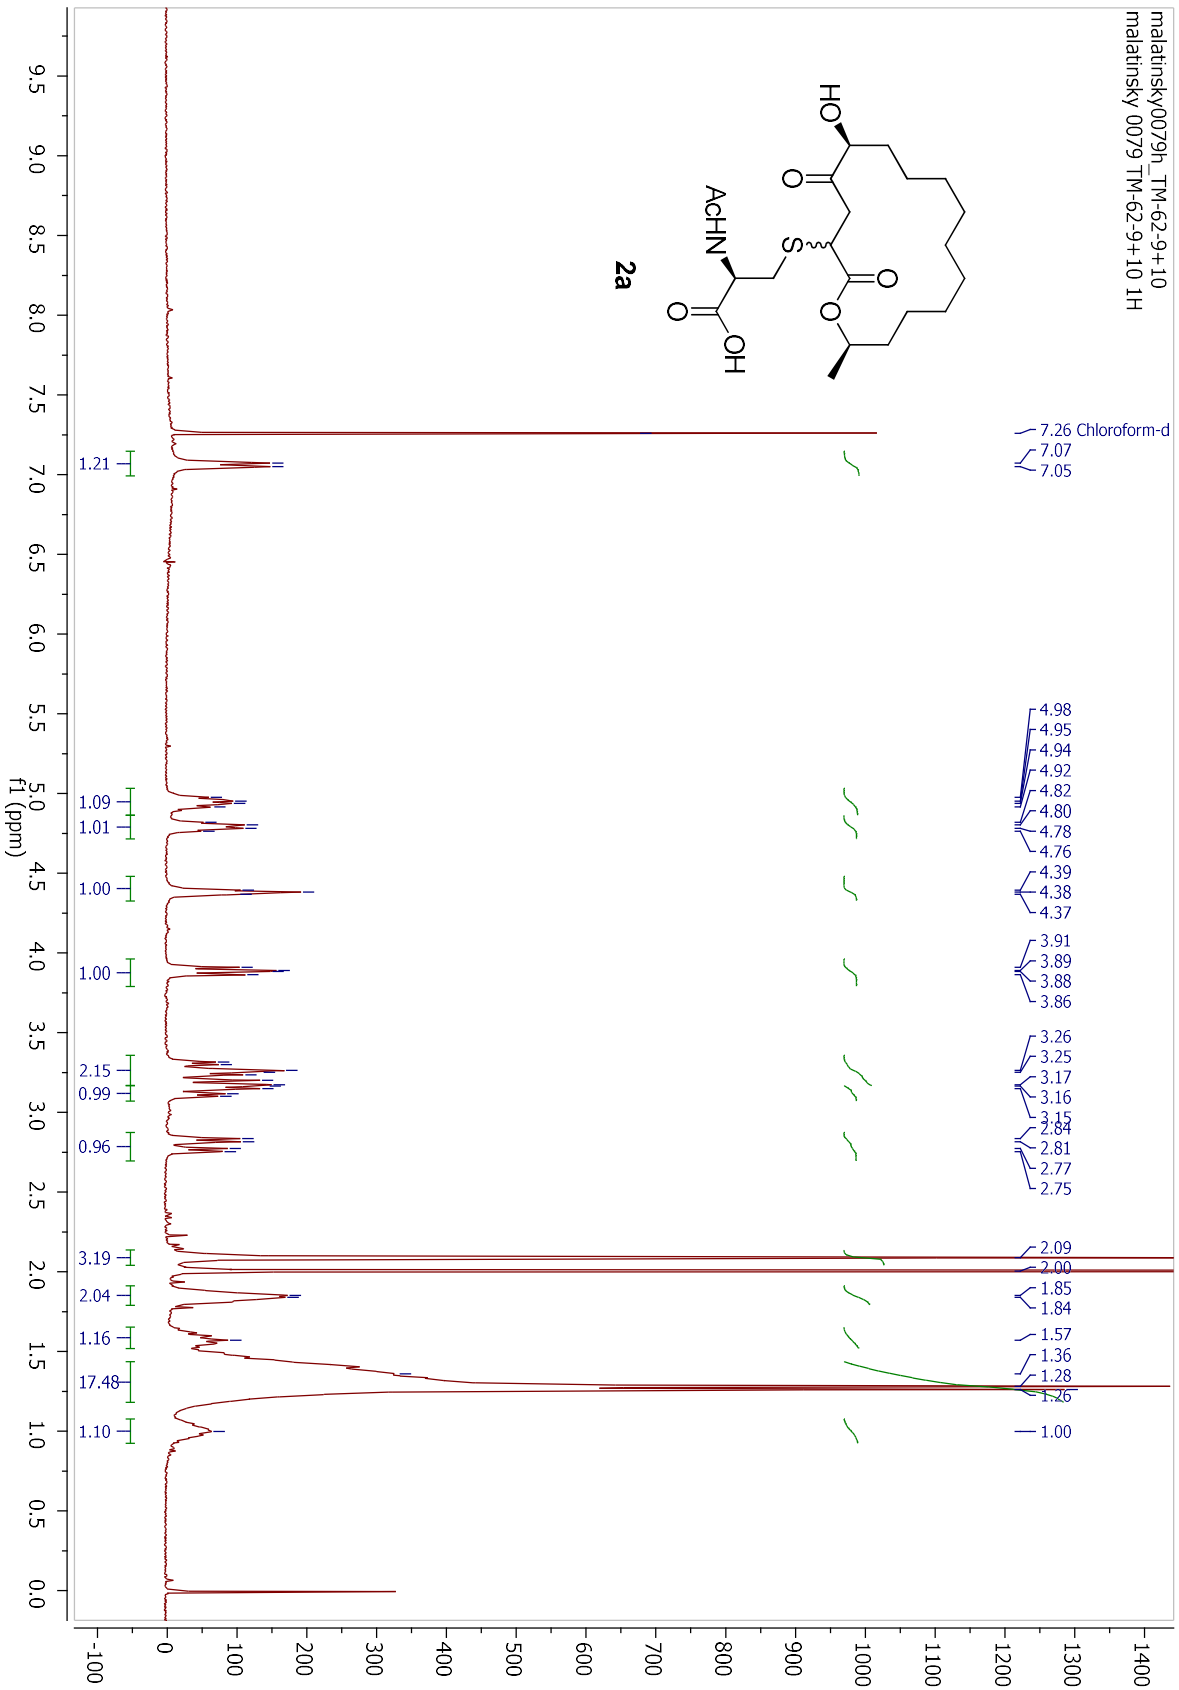

malatinsky\_1121\_TM-312-MAJ  
Bruker 400 MHz  
malatinsky\_1121\_TM-312-MAJ  
CDCl3  
25 Mar 2022

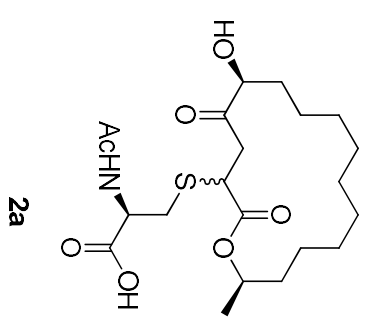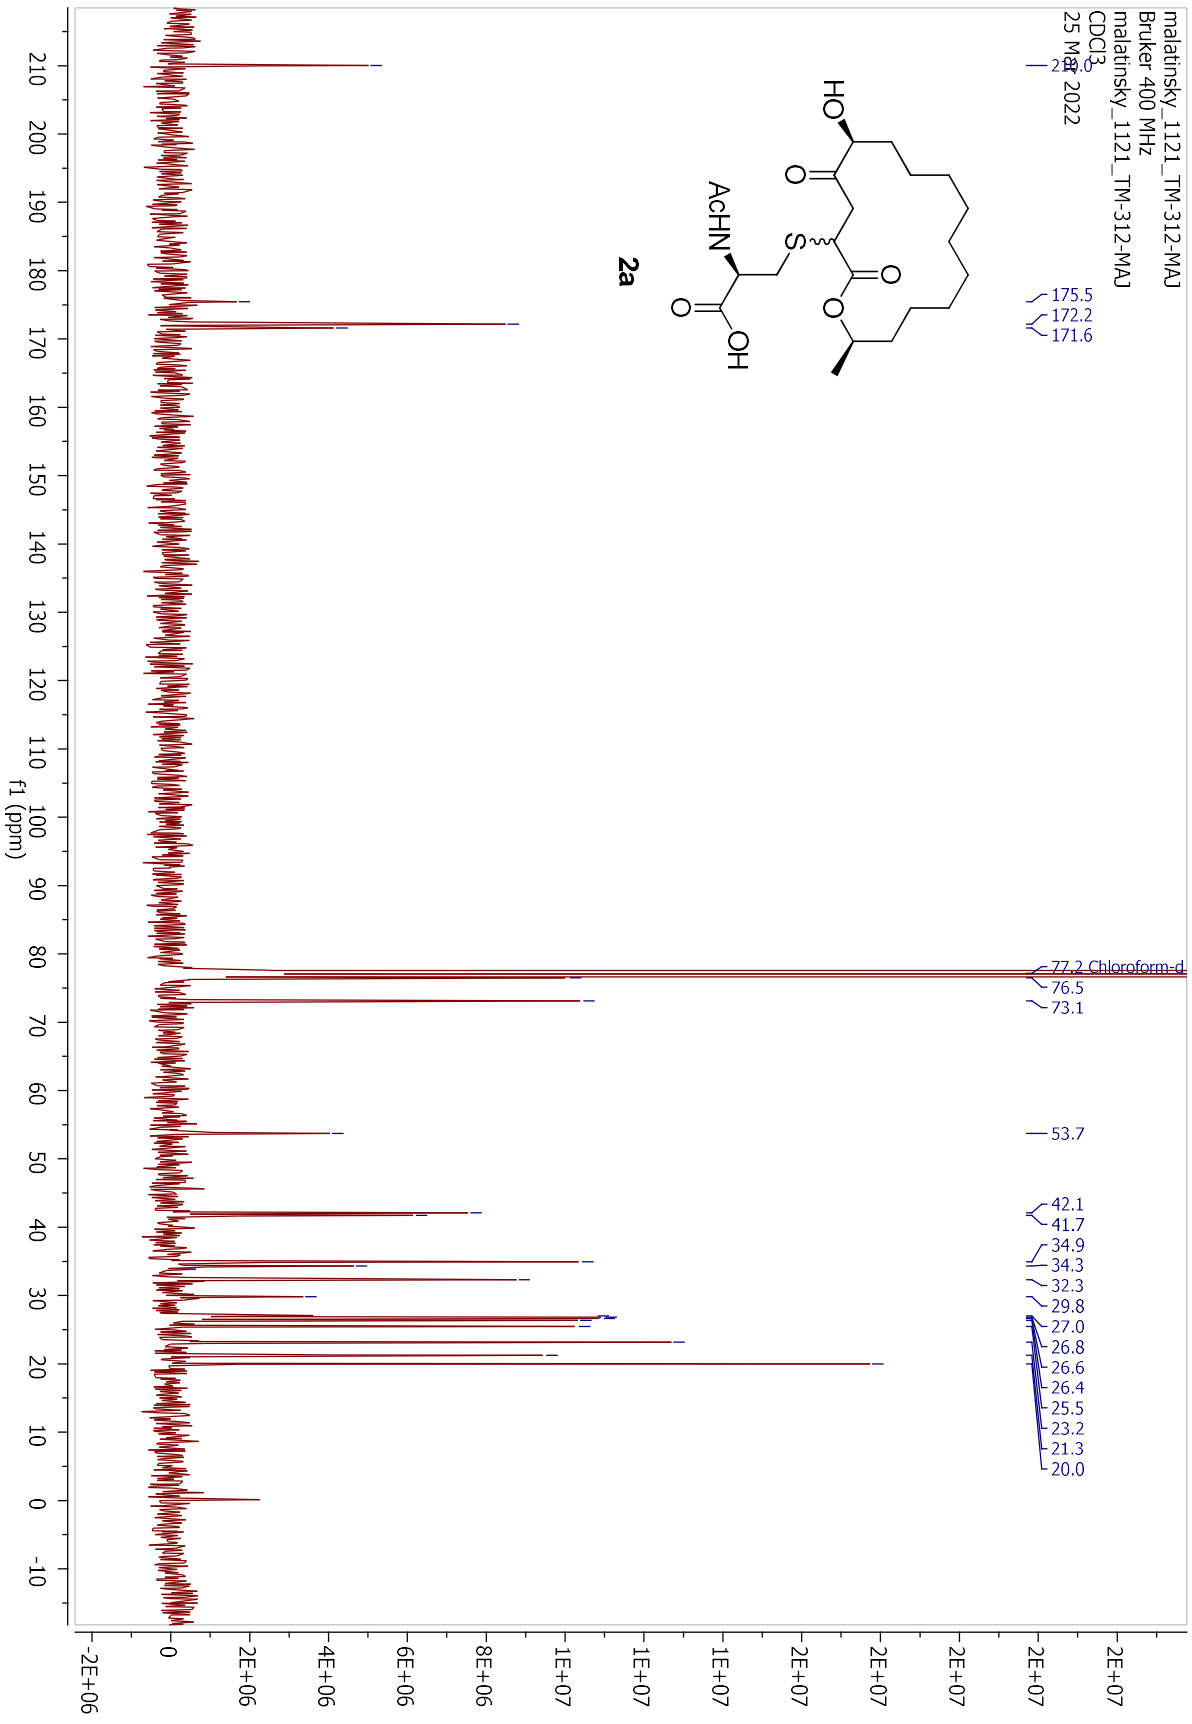

malatinsky0124nbdx\_TM-62-11  
malatinsky 0124 TM-62-11 1H dbx

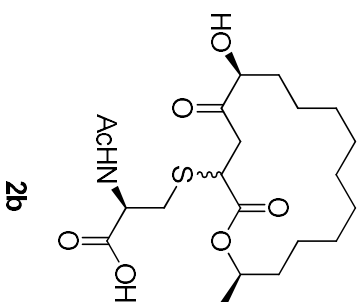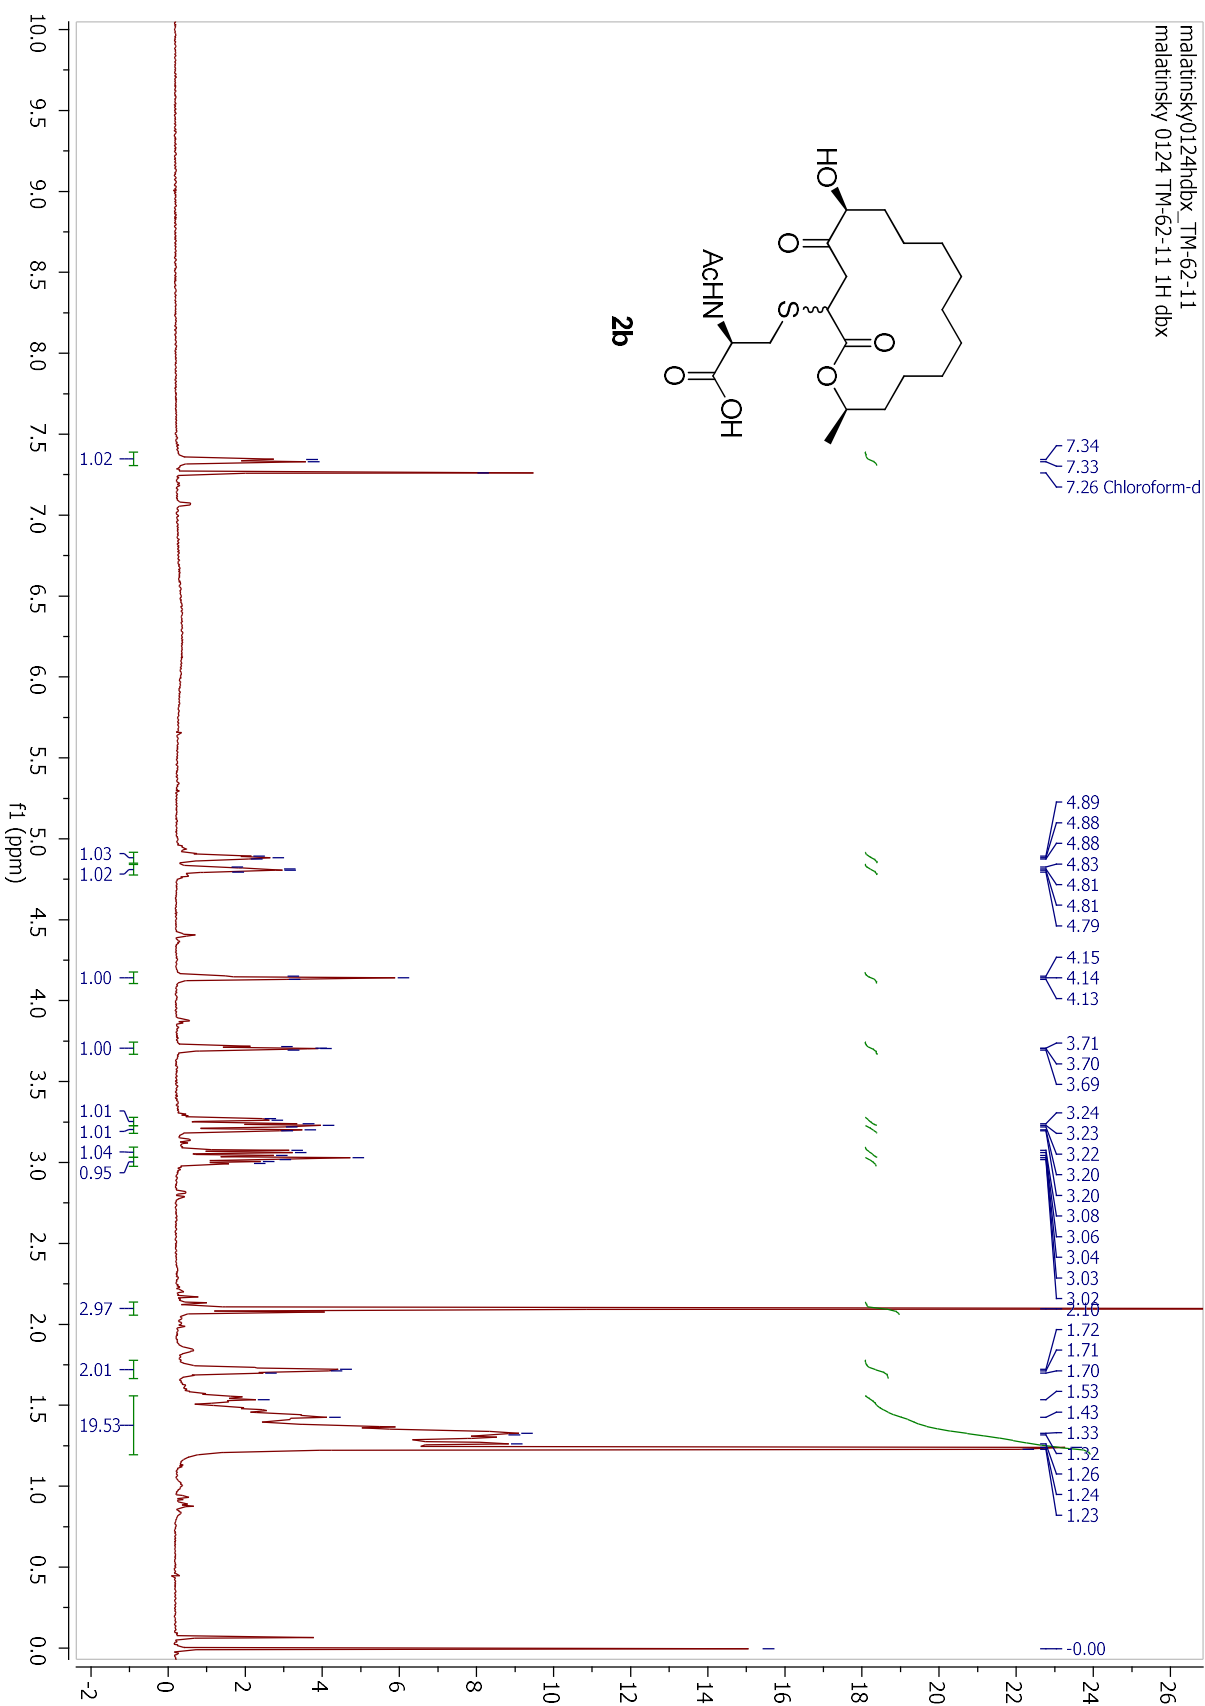

malatinsky0124cdbx\_TM-62-11  
malatinsky 0124 TM-62-11 13C dbx

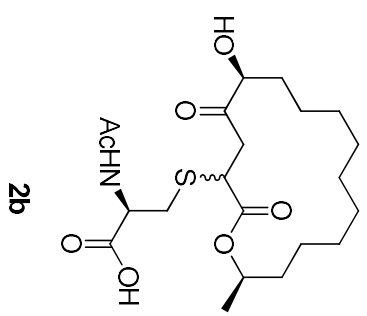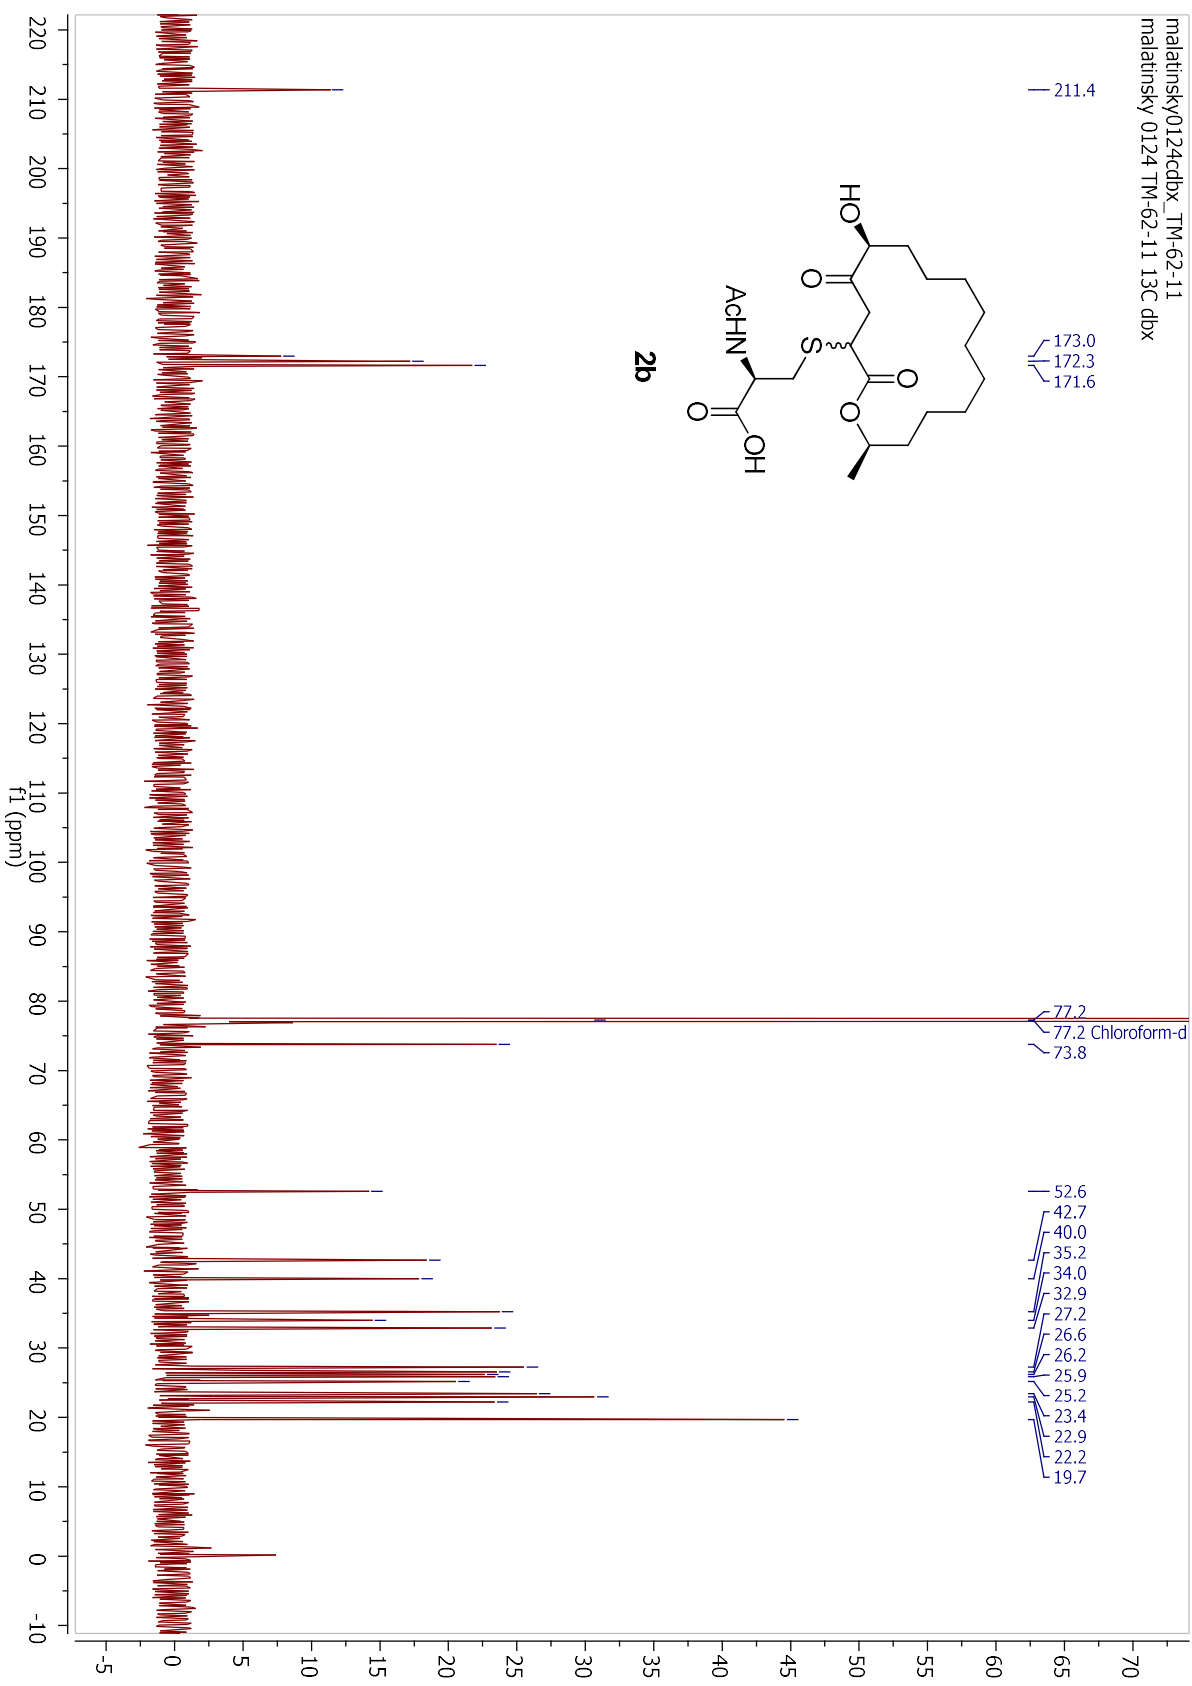

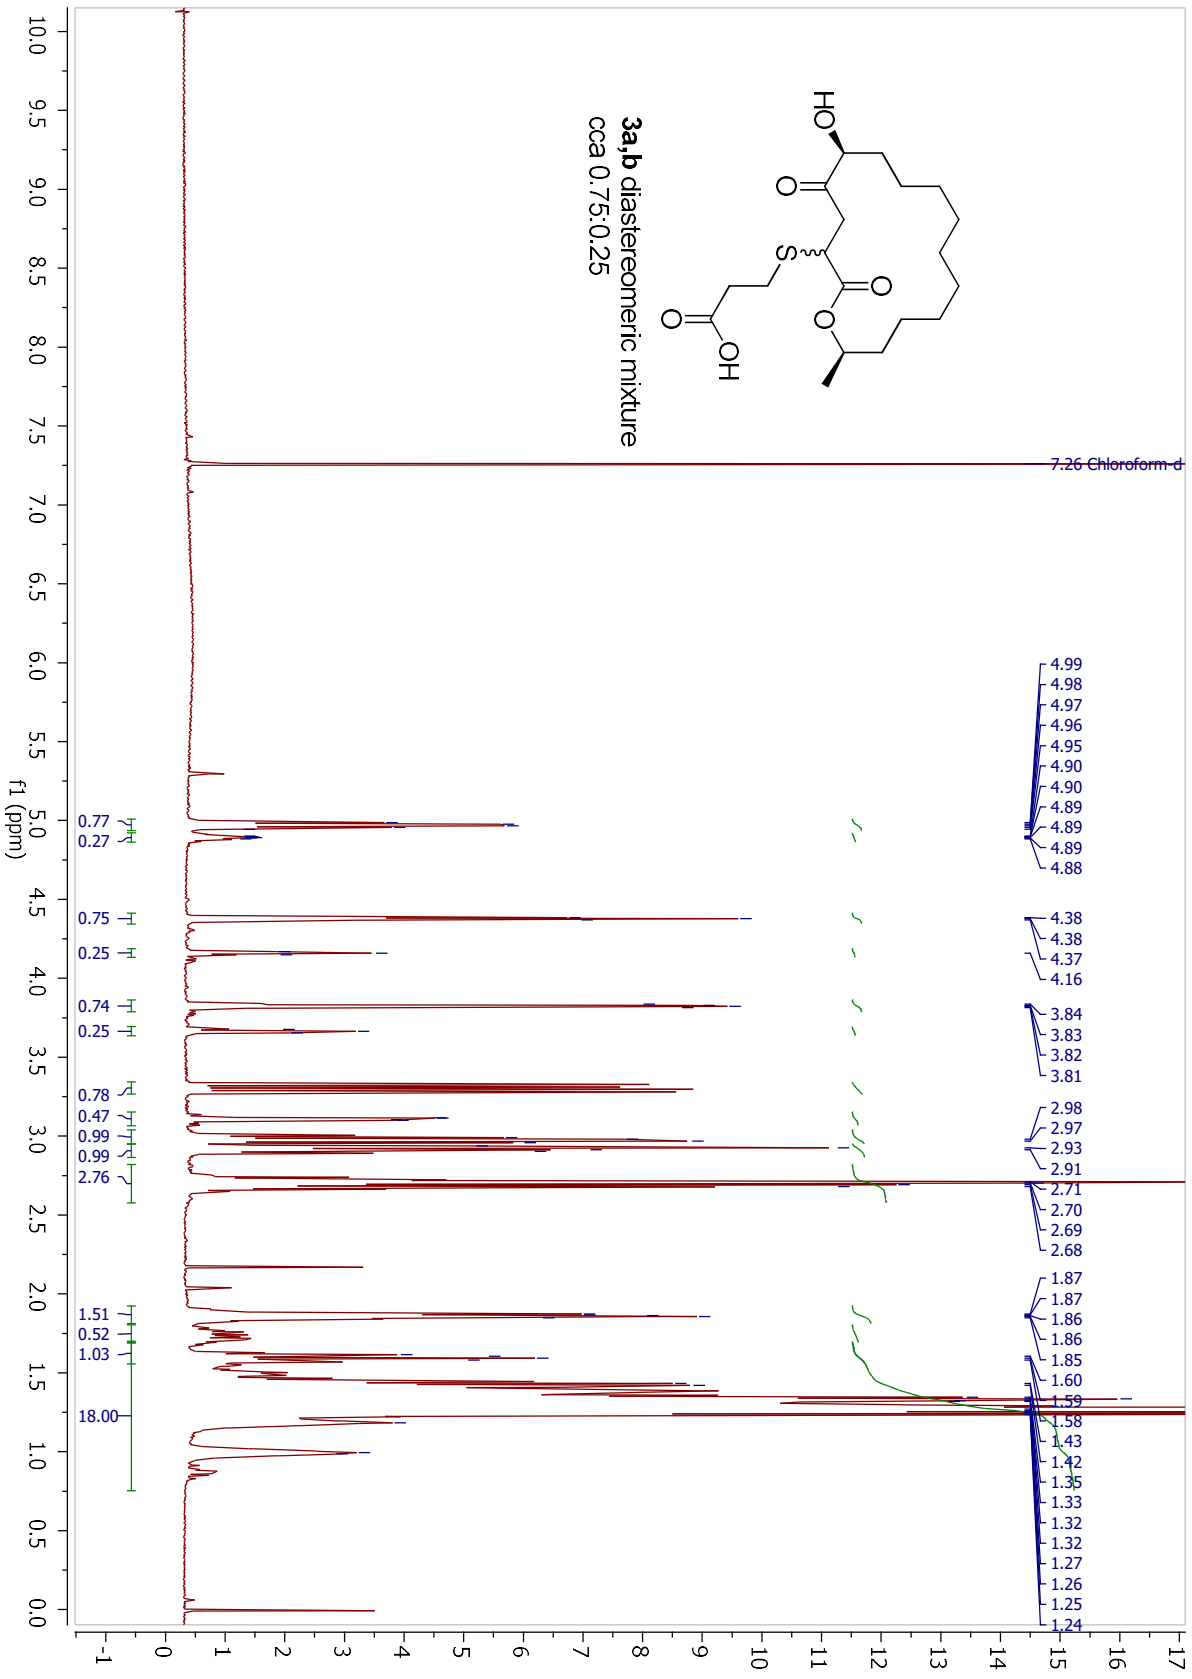



malatinsky0020cdbhx\_TM-51-4  
malatinsky 0020 TM-51-4 13C dbx

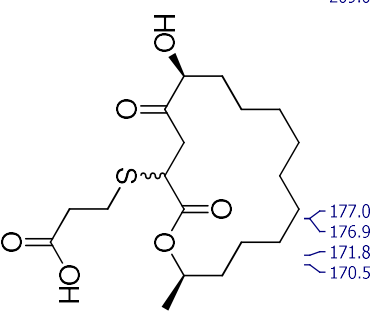

**3a,b diastereomeric mixture**  
cca 0.75:0.25

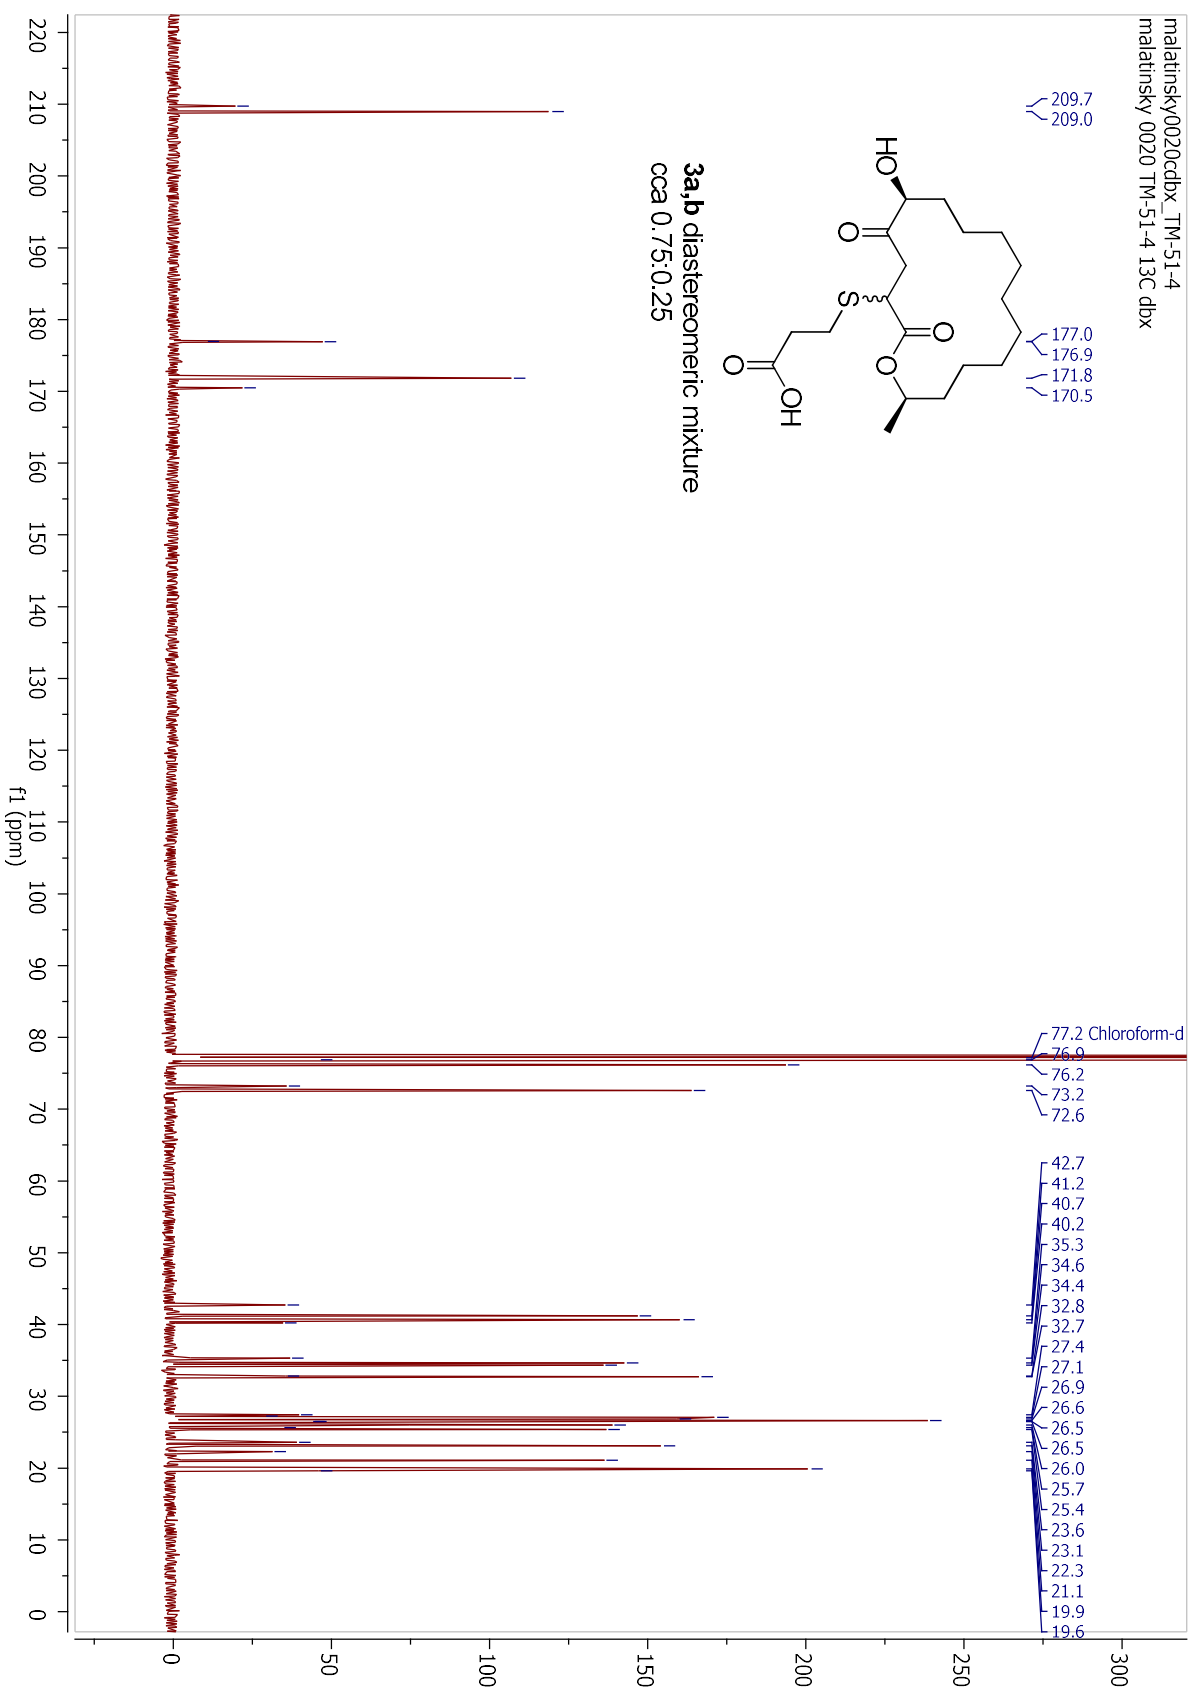

malatinsky0060hdbx\_TM-52-1-1  
malatinsky 0060 TM-52-1-1 1H dbx

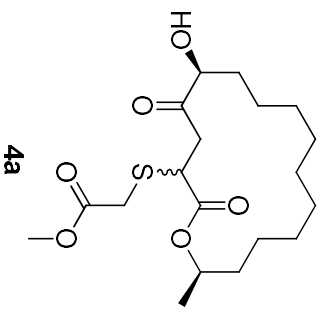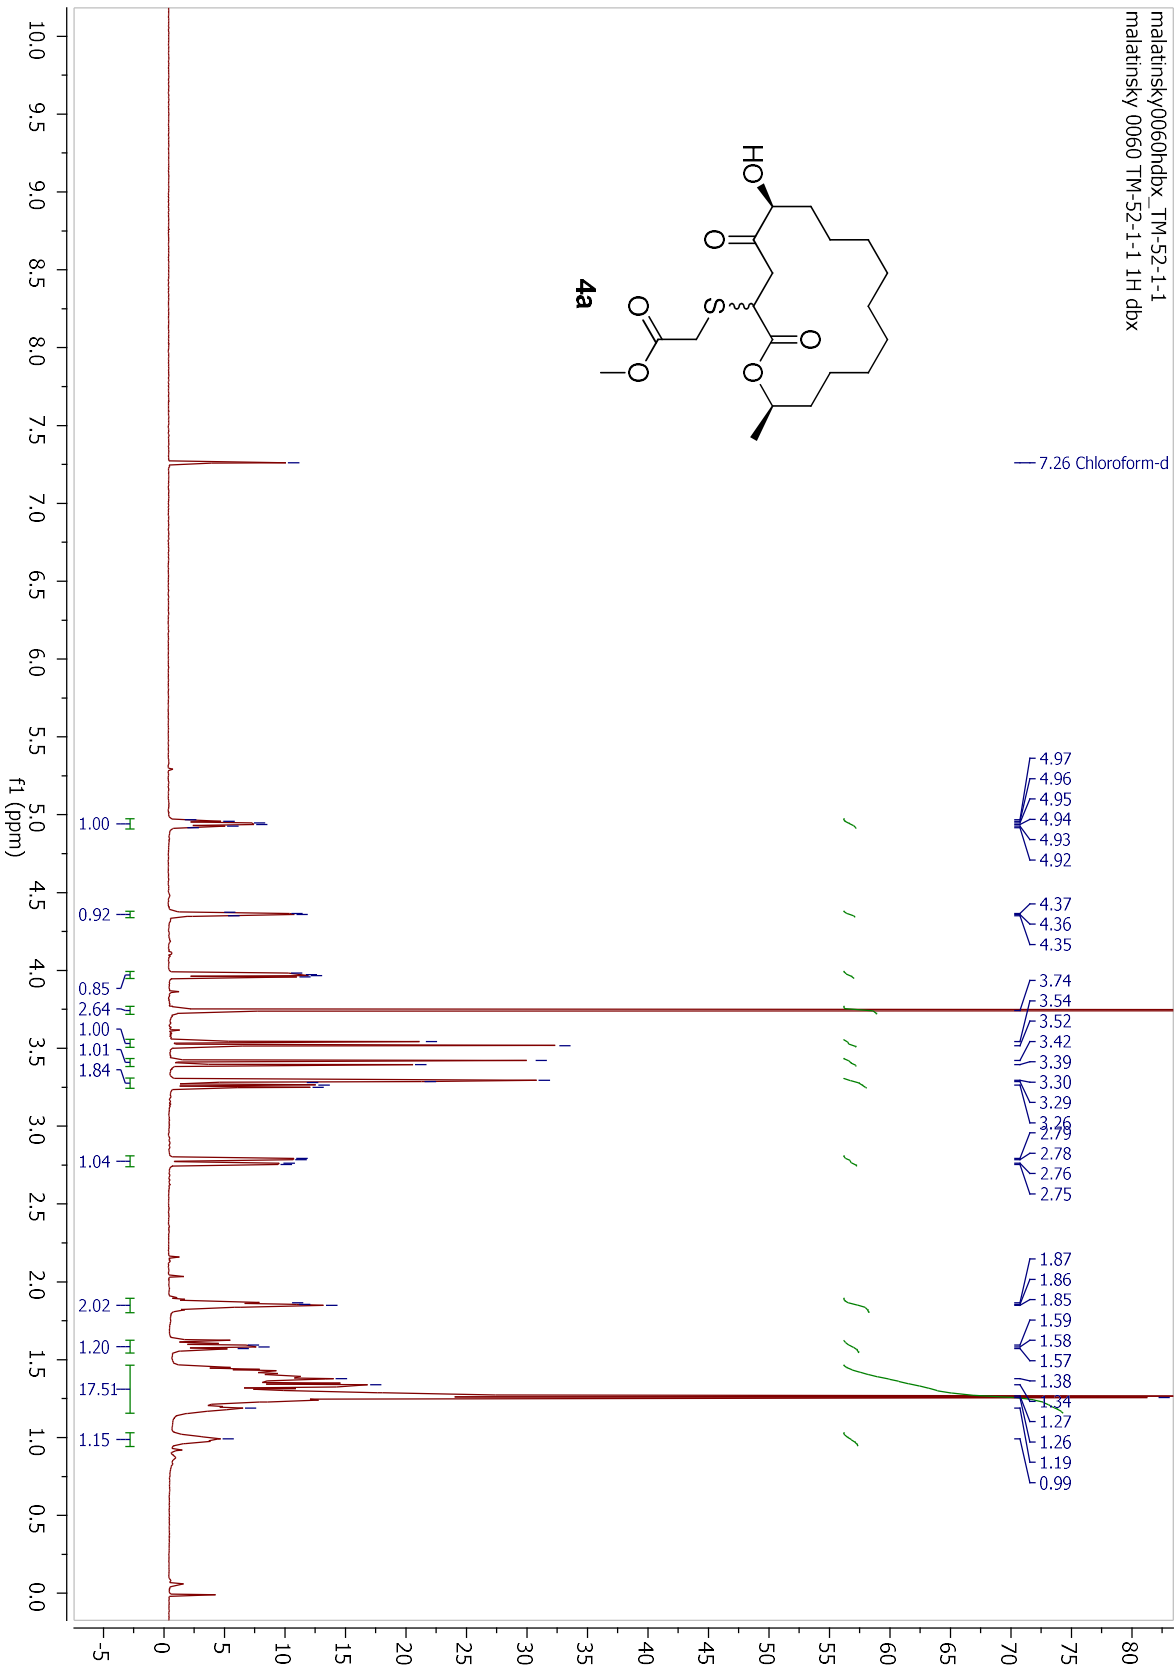

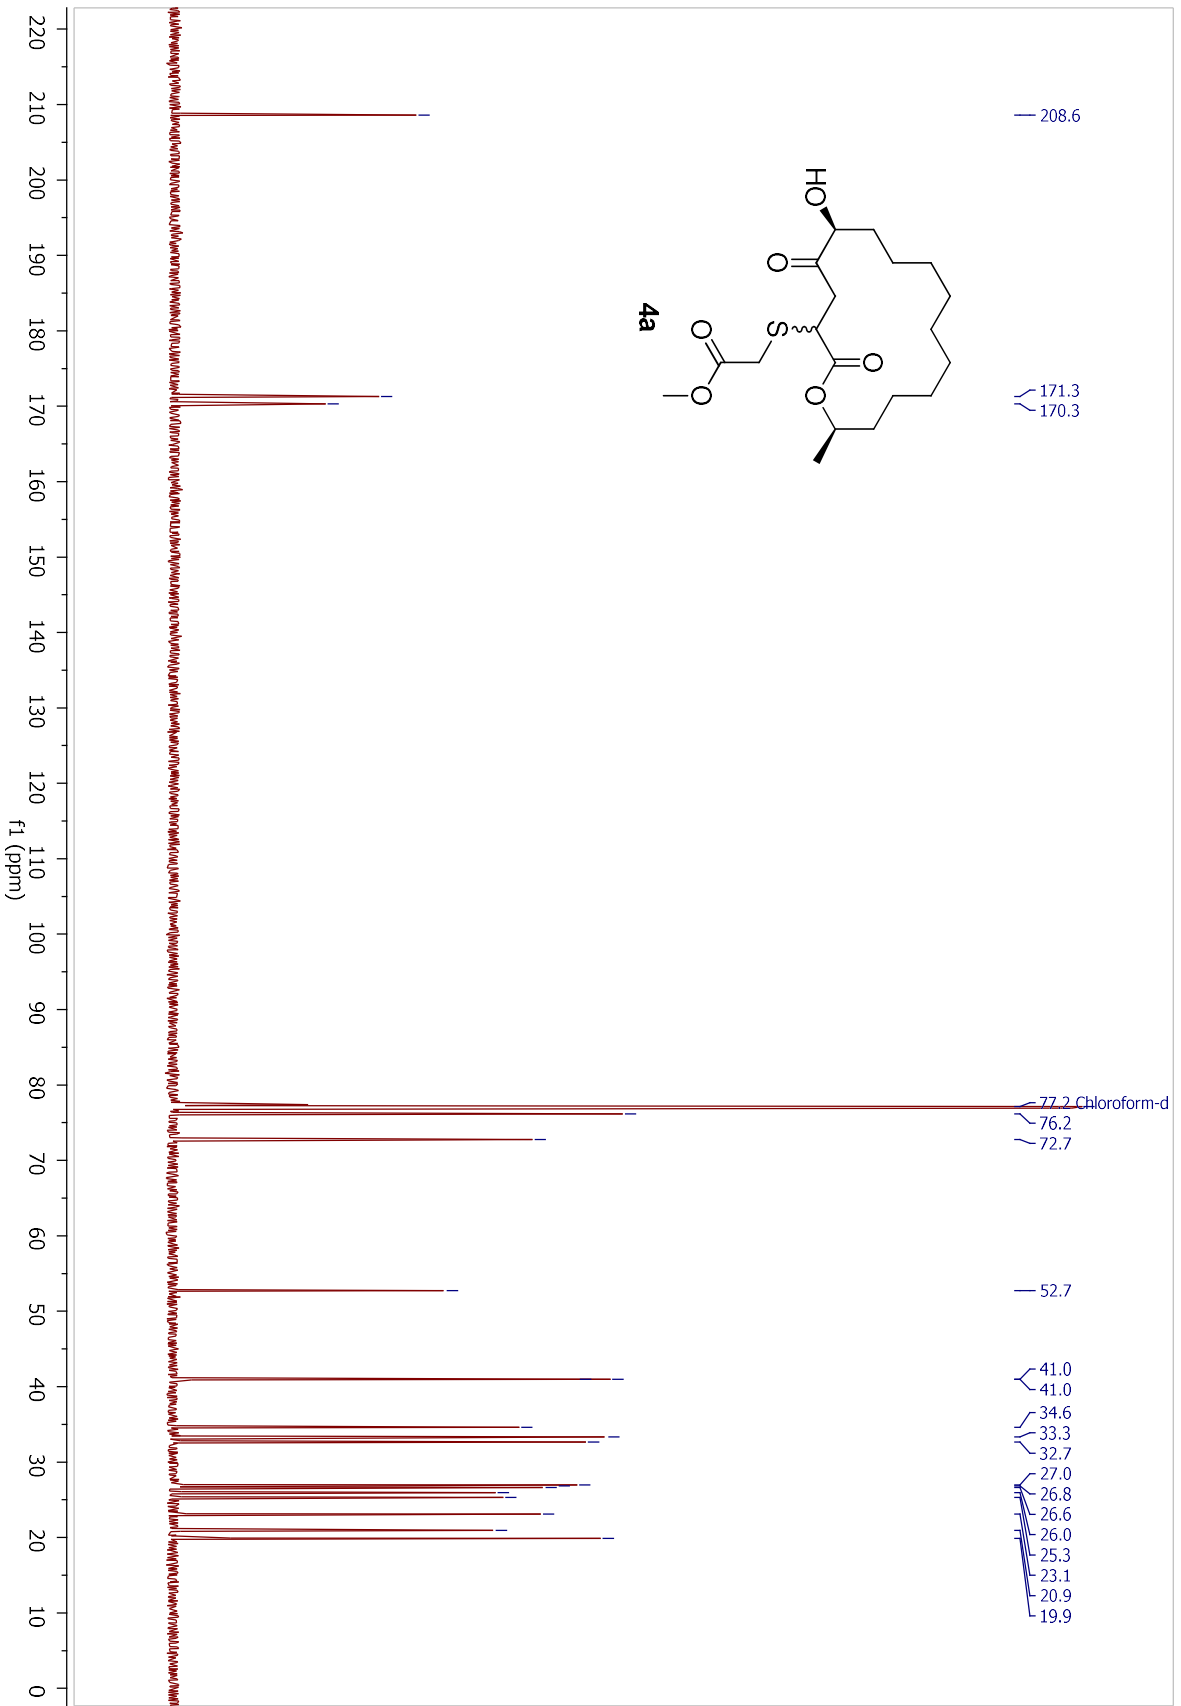

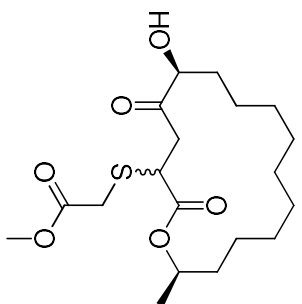

**4b**  
 partial epimerization of **4b** to **4a** was  
 observed during NMR measurement

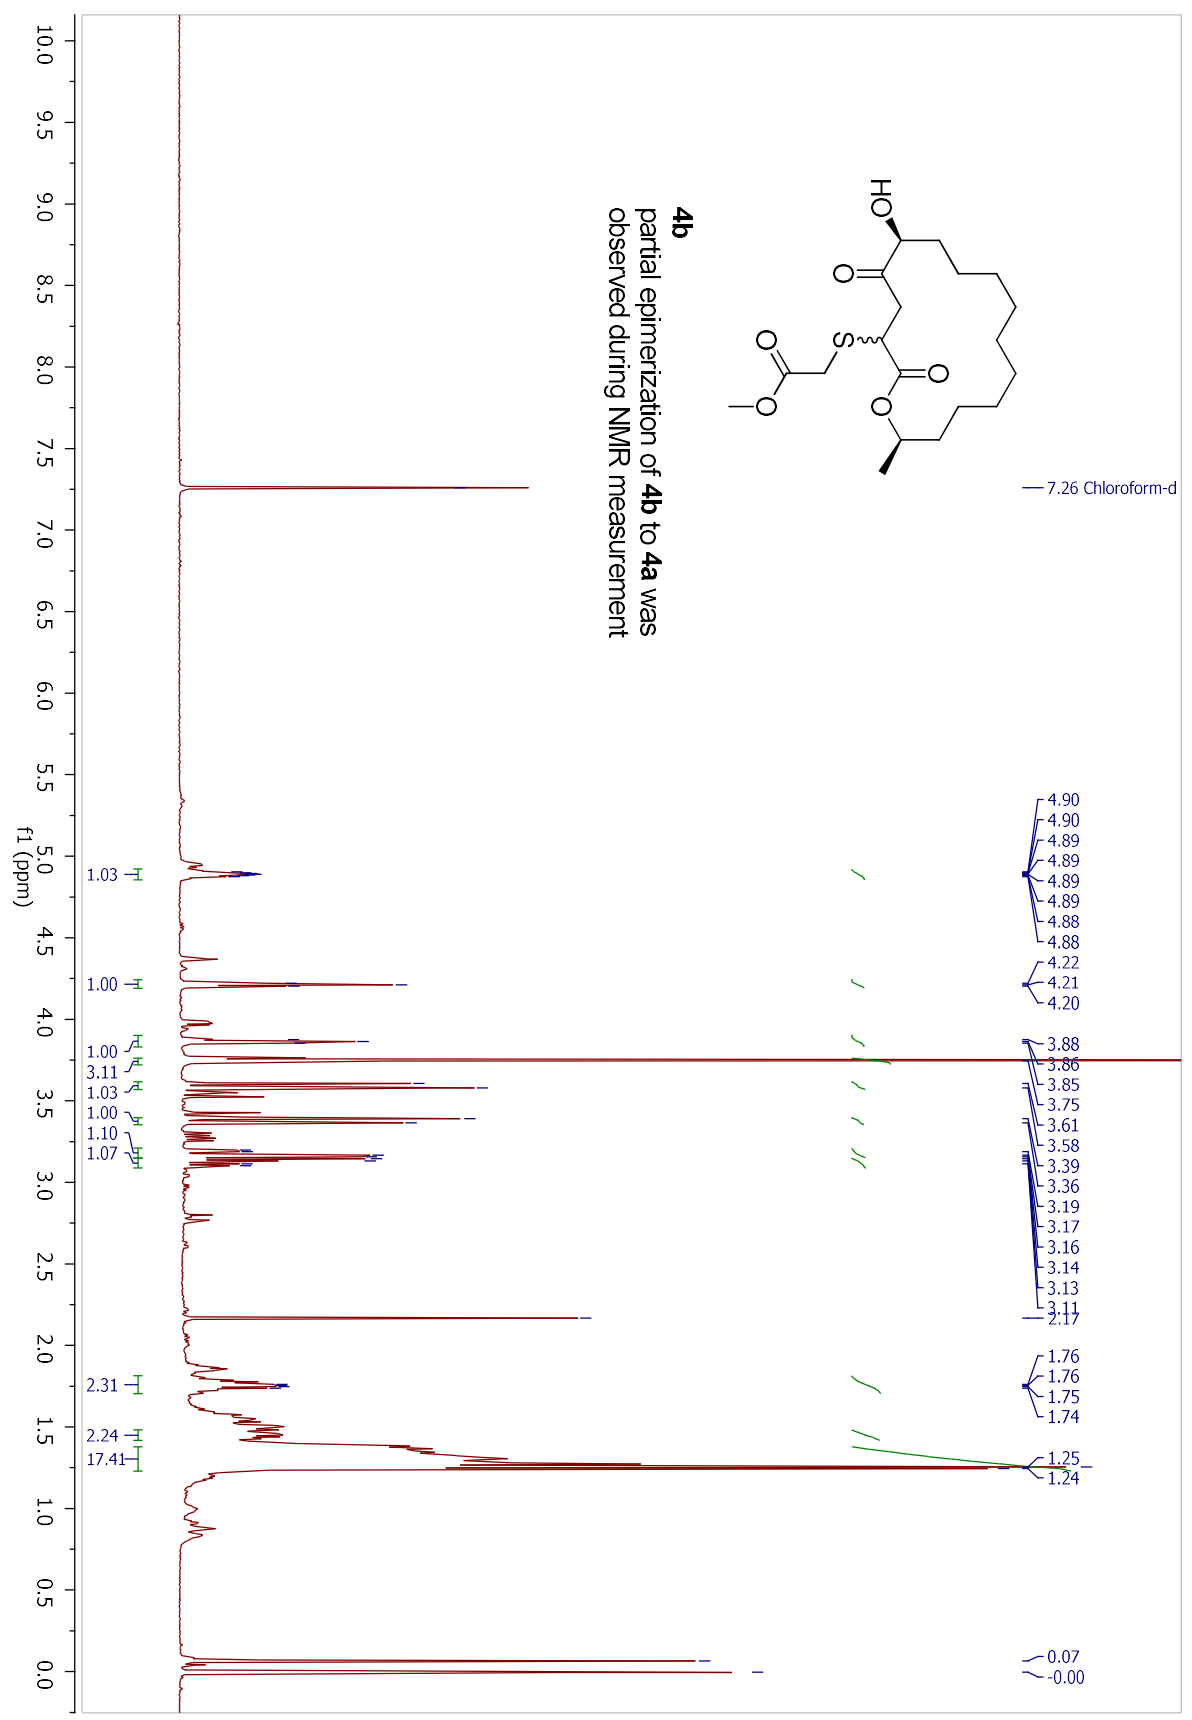

malatinsky0145cdbx\_TM-52-2-2  
malatinsky 0145 TM-52-2-2 13C dbx

170.5  
170.0

76.6  
73.4

52.7  
42.8  
40.3  
35.2  
33.9  
32.8  
27.3  
26.5  
26.3  
26.0  
25.4  
23.4  
21.9  
19.7

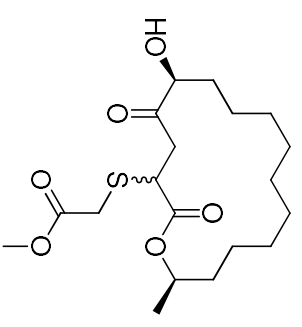

**4b**  
partial epimerization of **4b** to **4a** was  
observed during NMR measurement

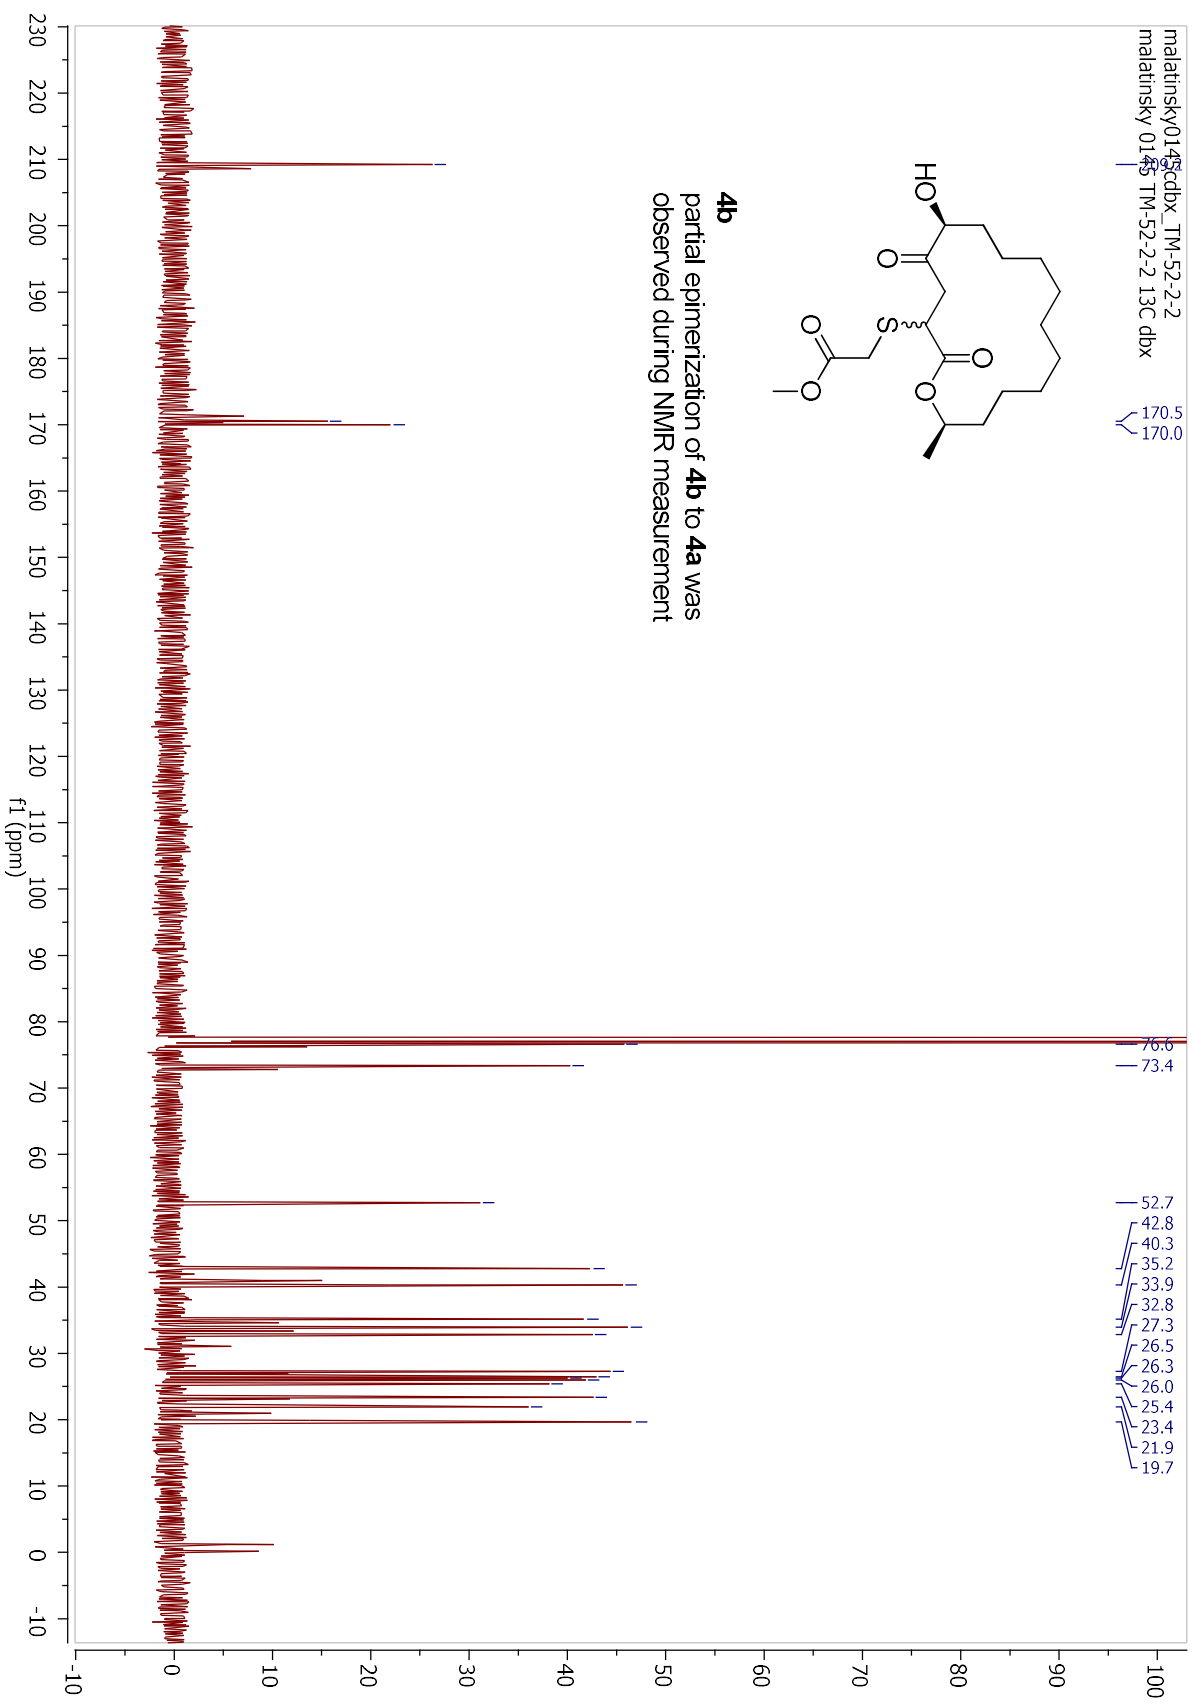

malatinsky\_0440\_TM-294-P  
Bruker 400 MHz  
malatinsky\_0440\_TM-294-P  
CDCl3  
10 Feb 2022

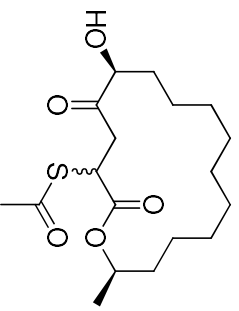

5a,b mixture of diastereomers cca 80:20

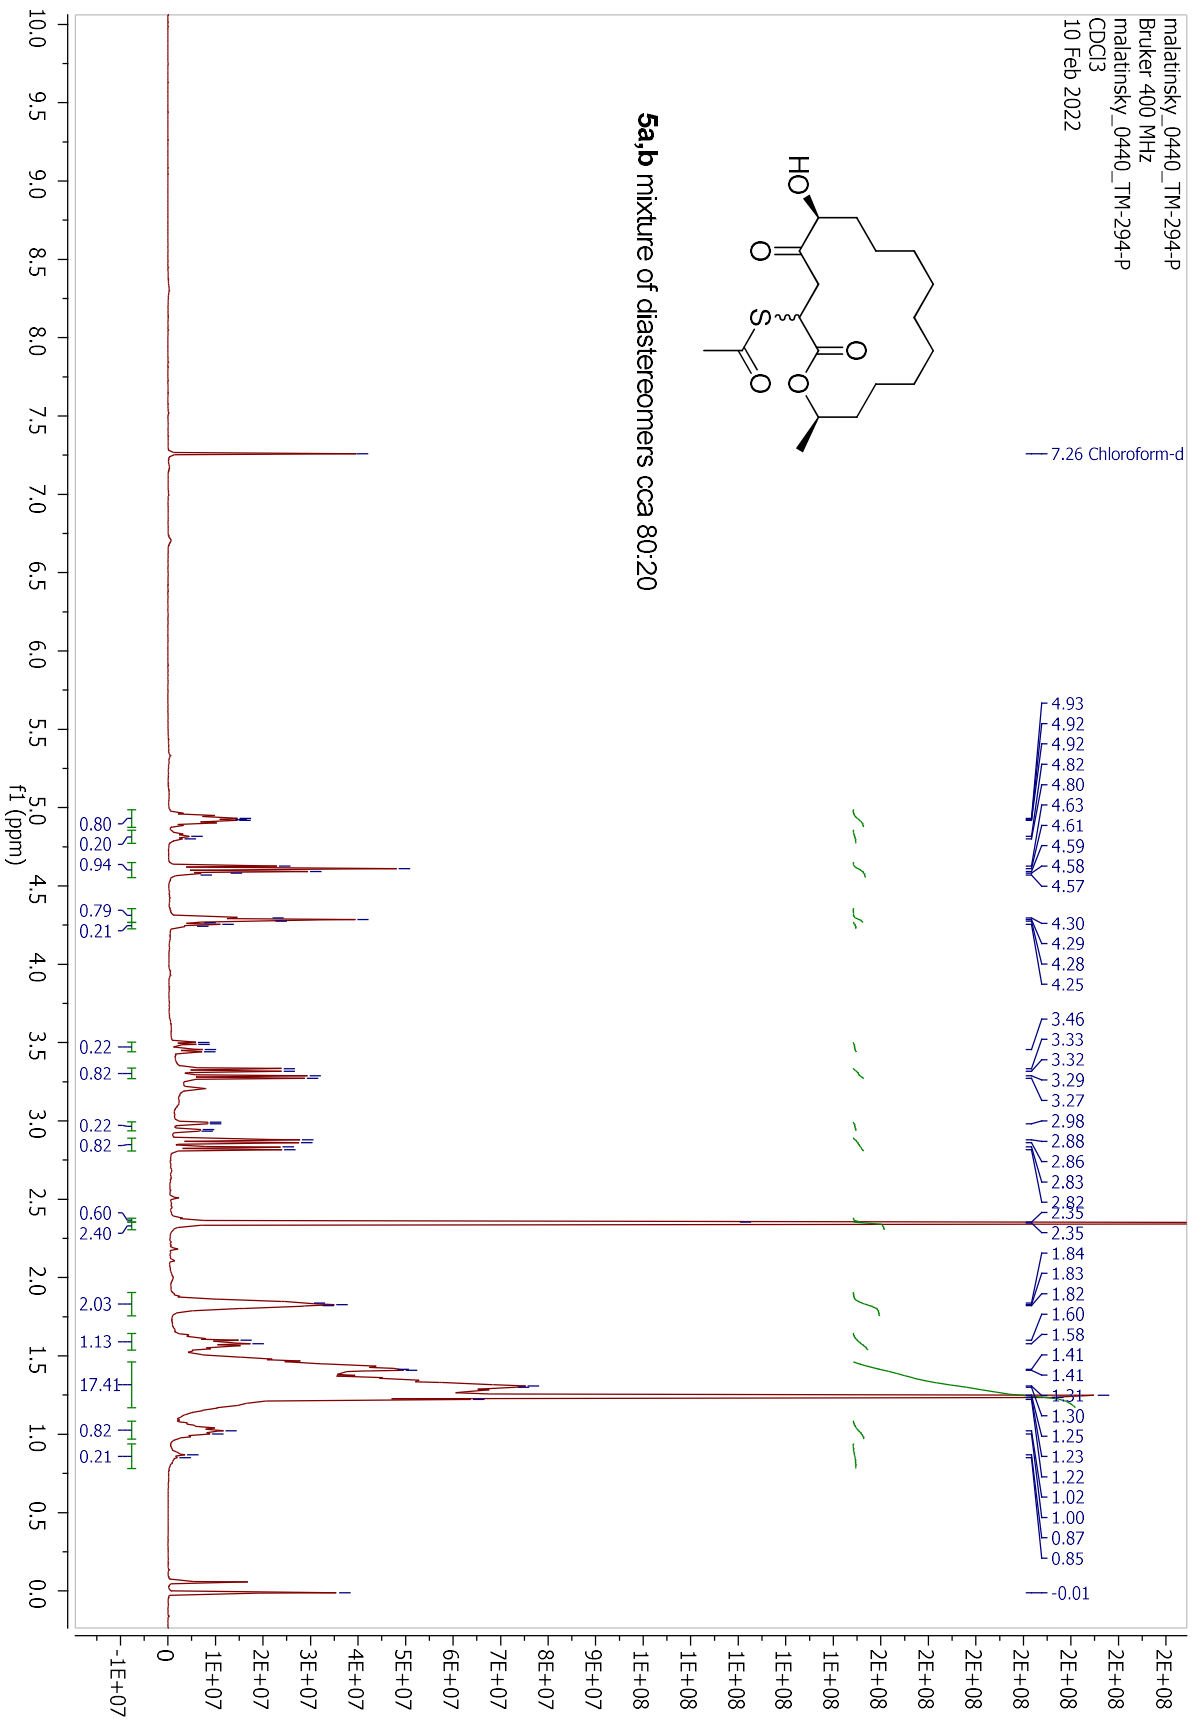



malatinsky0059indbx\_TM-61-P  
malatinsky 0059 TM-61-P 1H dbx

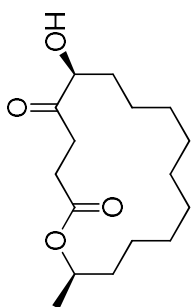

6

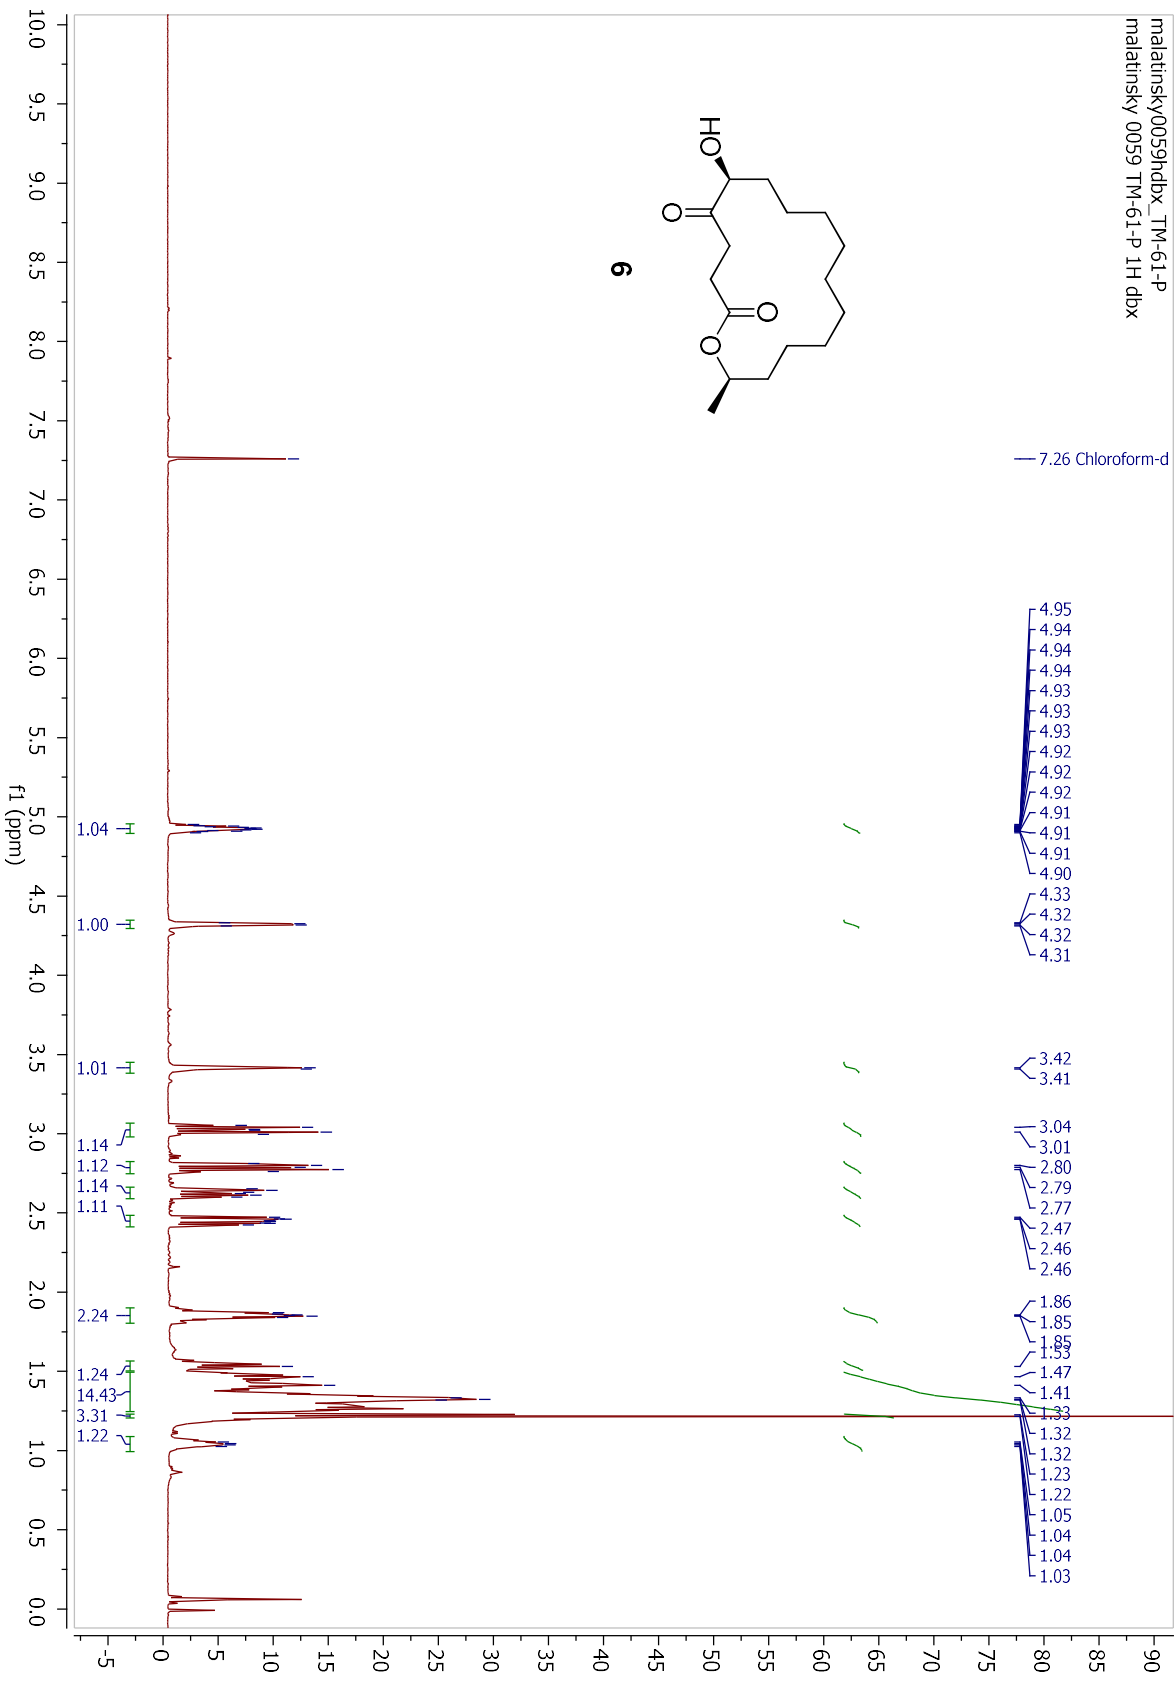



malatinsky0059cdbh\_TM-61-P  
malatinsky 0059 TM-61-P 13C dbx

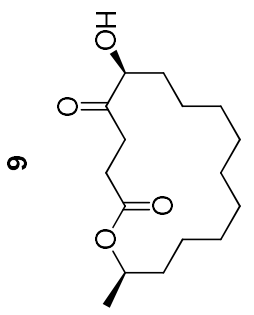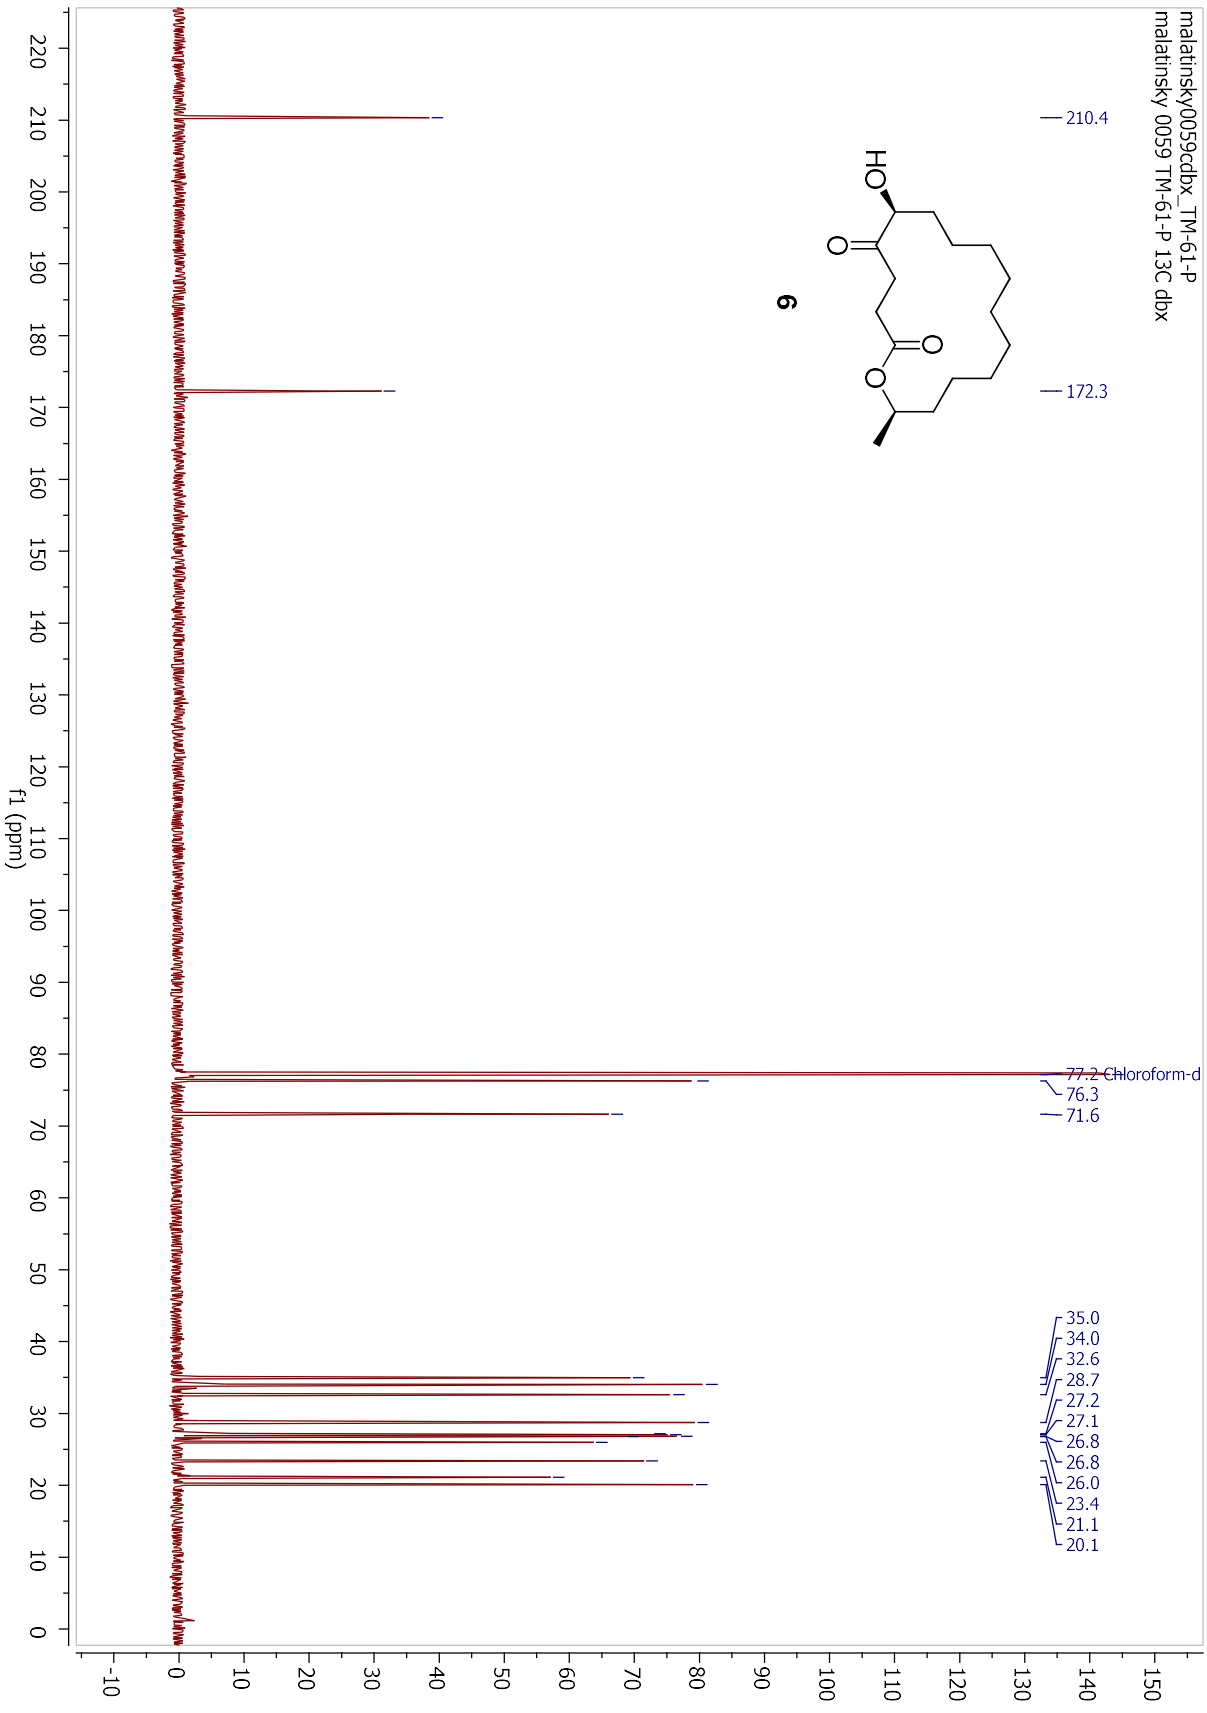

malatinsky\_1289\_TM-327-P-new 13C and 1H  
Bruker 400 MHz  
malatinsky\_1289\_TM-327-P  
CDCl3  
7 Apr 2022

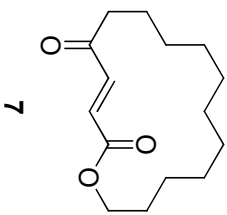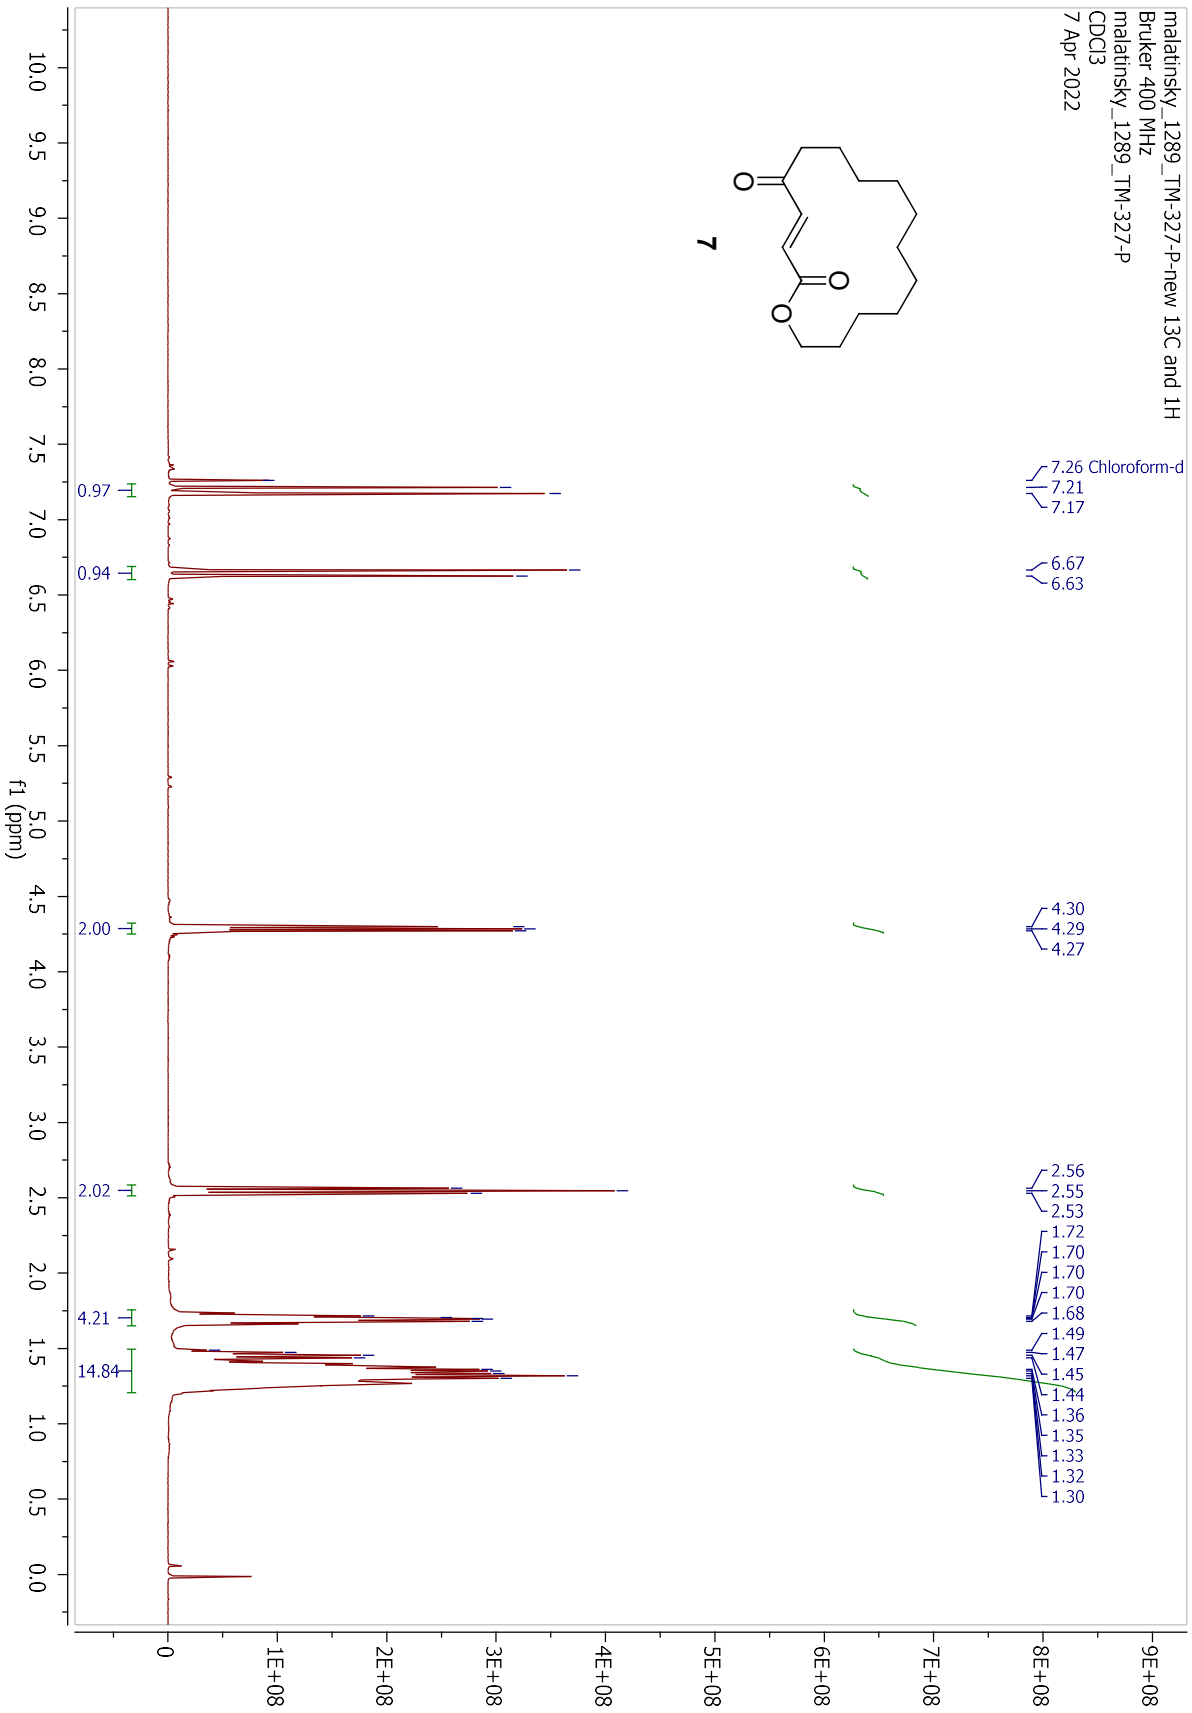

malatinsky\_1289\_TM-327-P-new 13C and 1H  
Bruker 400 MHz  
malatinsky\_1289\_TM-327-P  
CDCl3  
7 Apr 2022

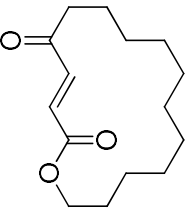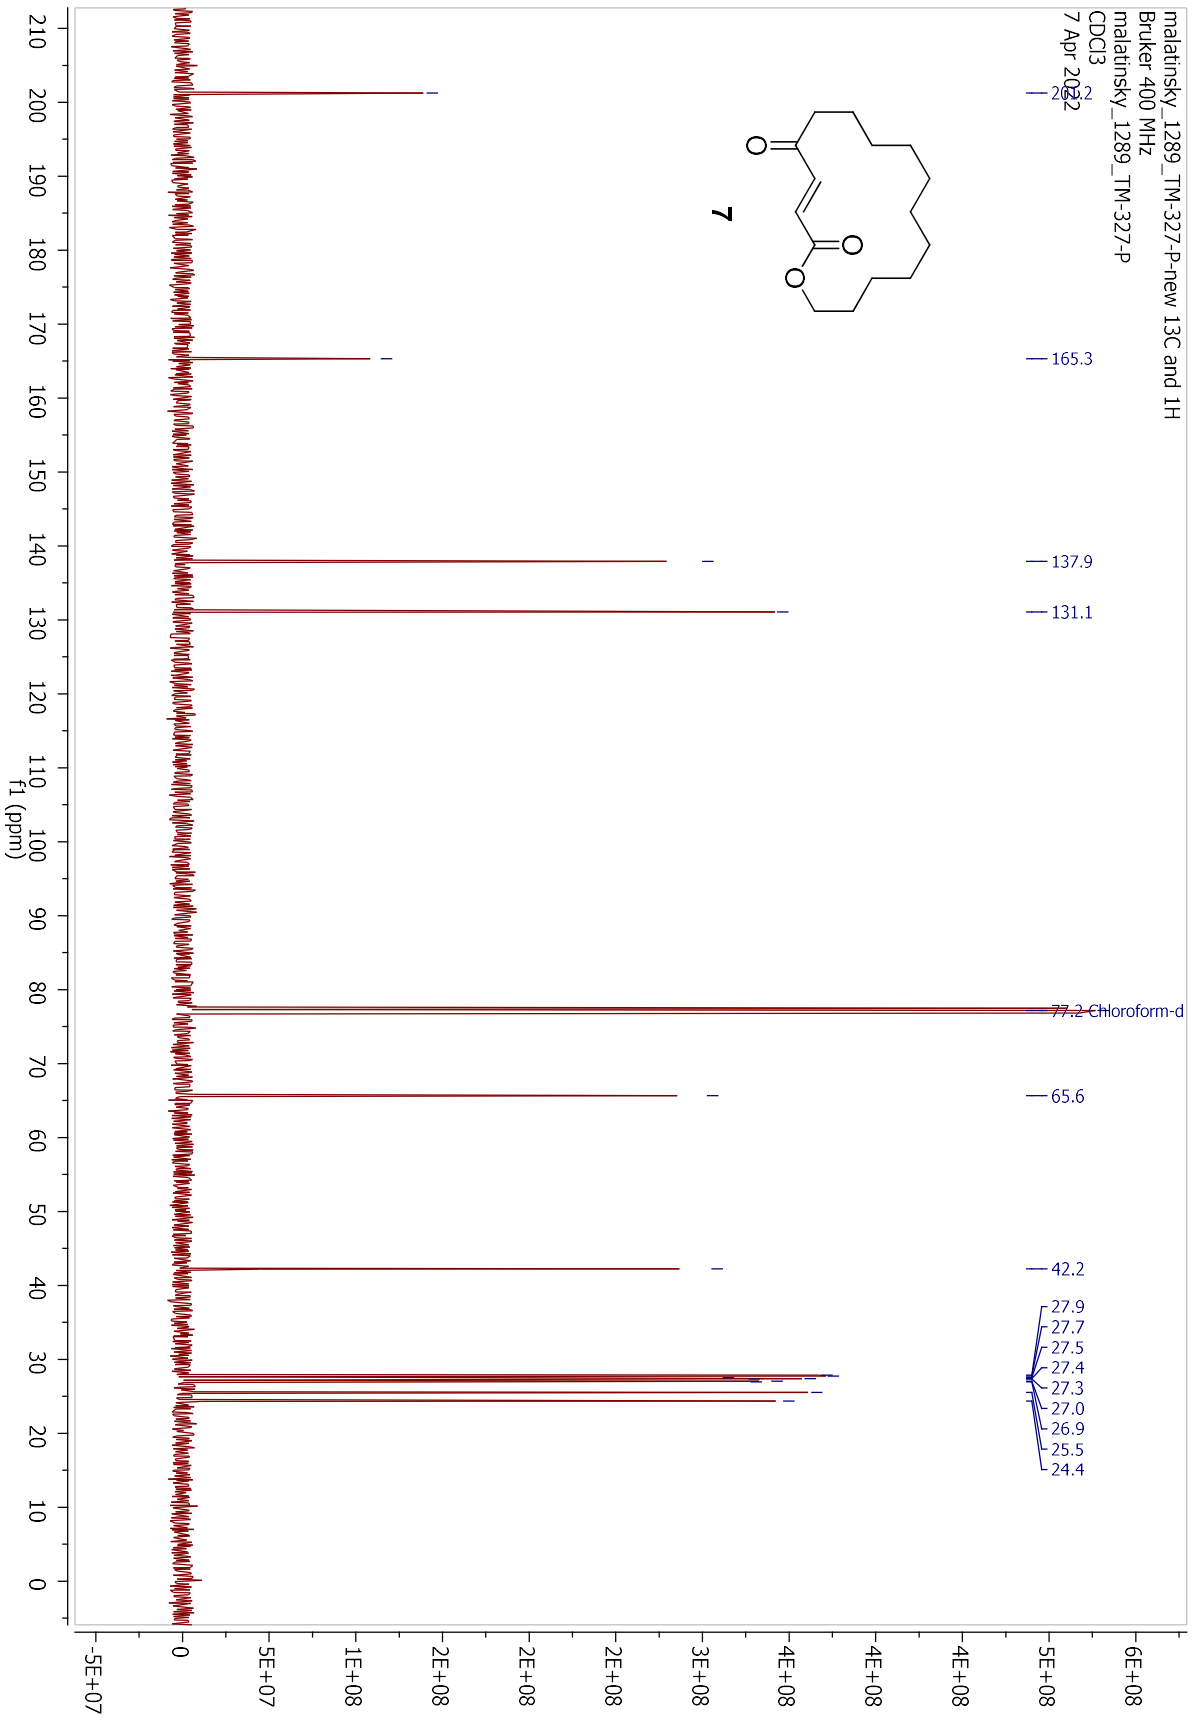

calctkova\_2487\_OC-TM-lactam  
Bruker 400 MHz  
calctkova\_2487\_OC-TM-lactam  
CD3OD  
30 Jun 2022

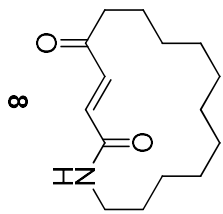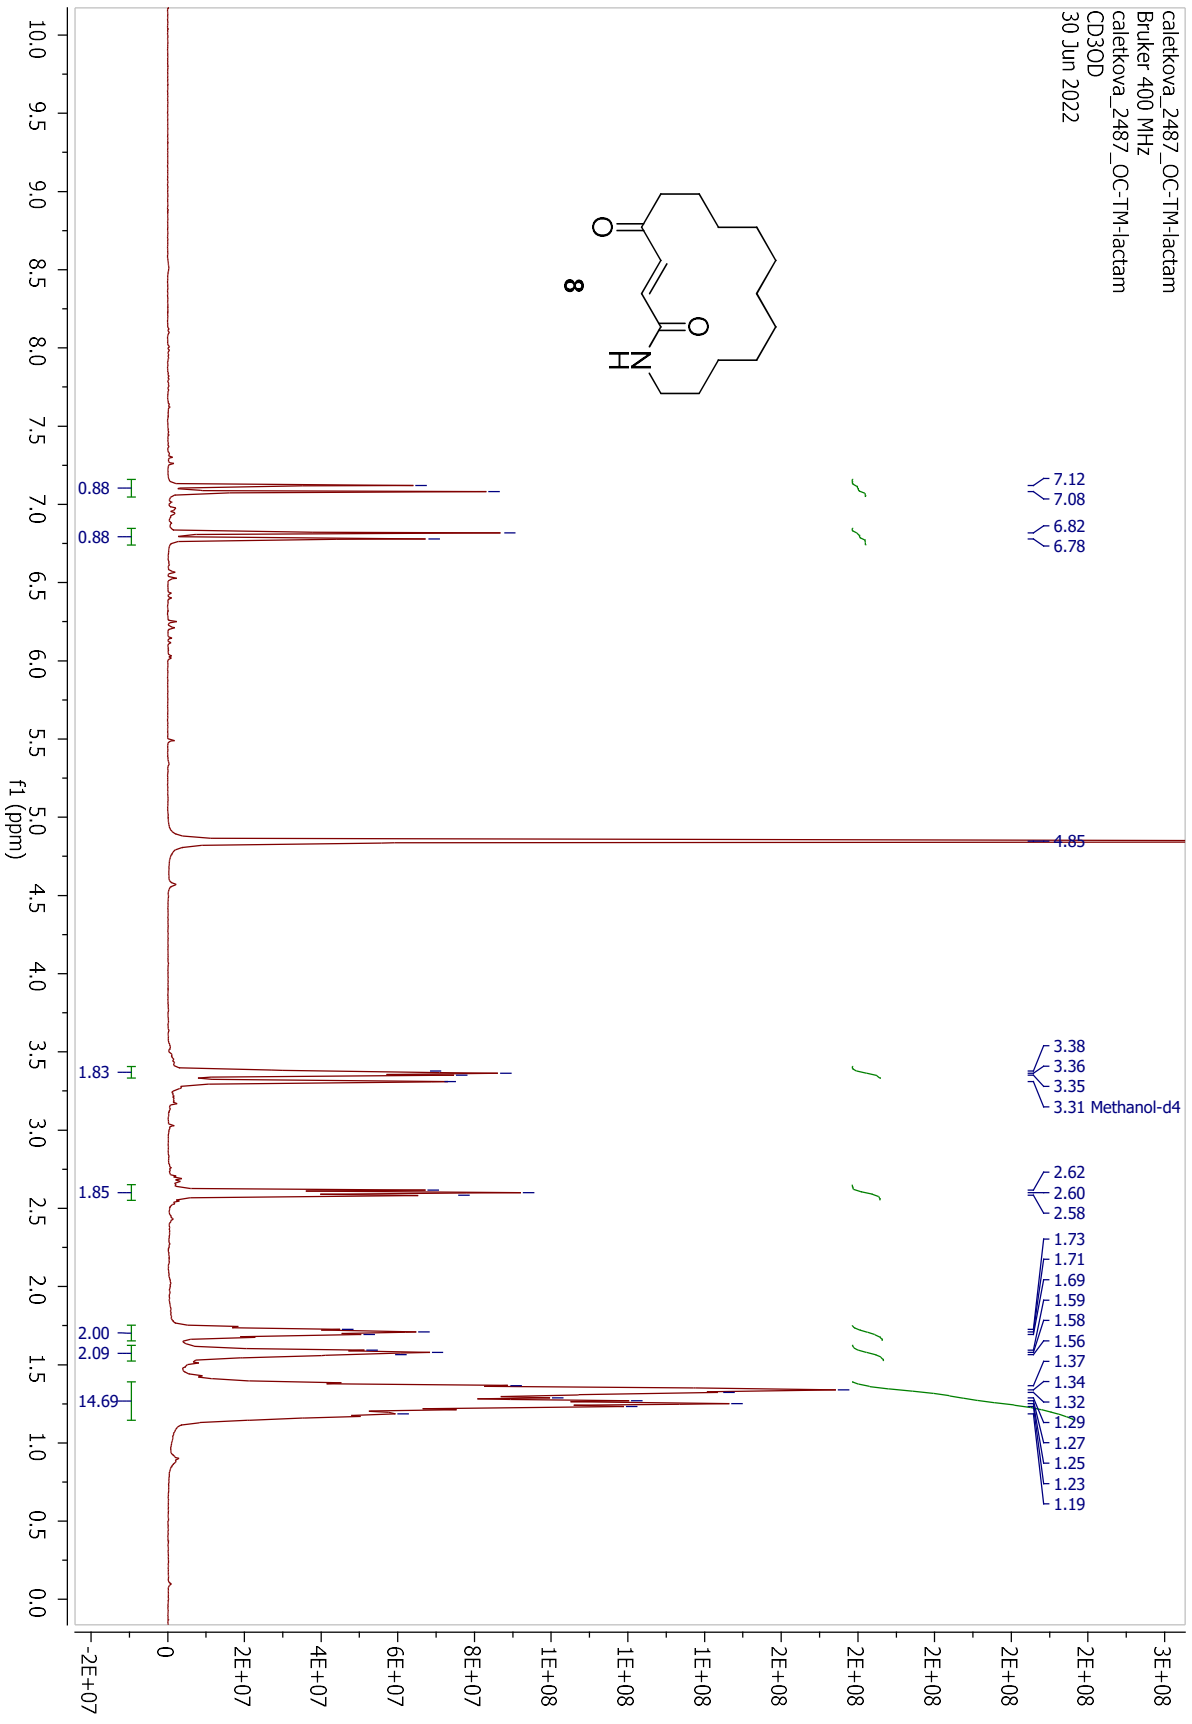



malansky1759hdbx\_TM-133-1  
malansky 1759 TM-133-1 1H dbx

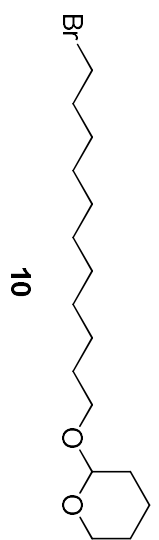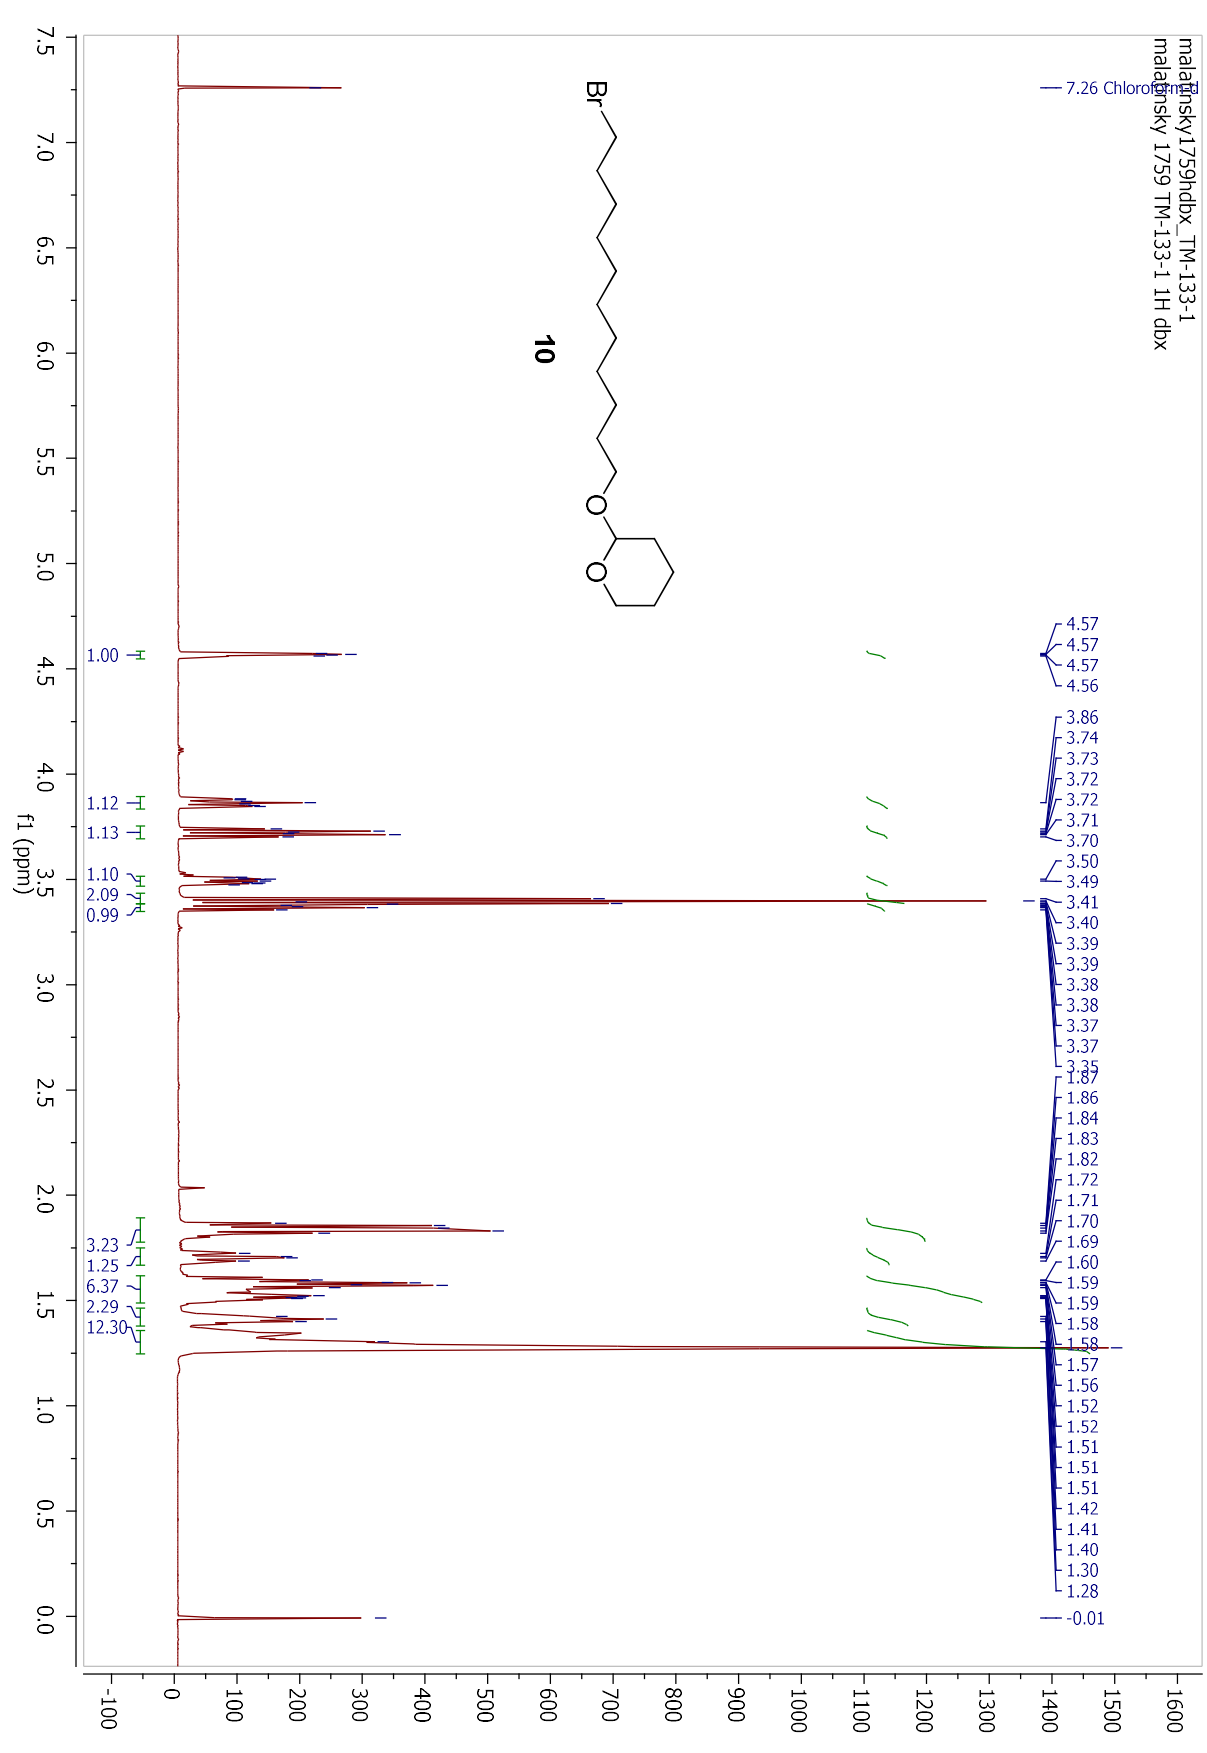

malatinsky1759cdbx\_TM-133-1  
malatinsky 1759 TM-133-1 13C dbx

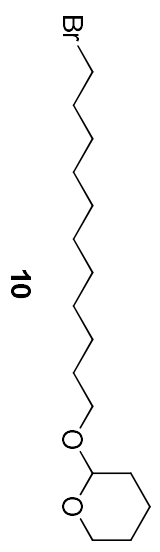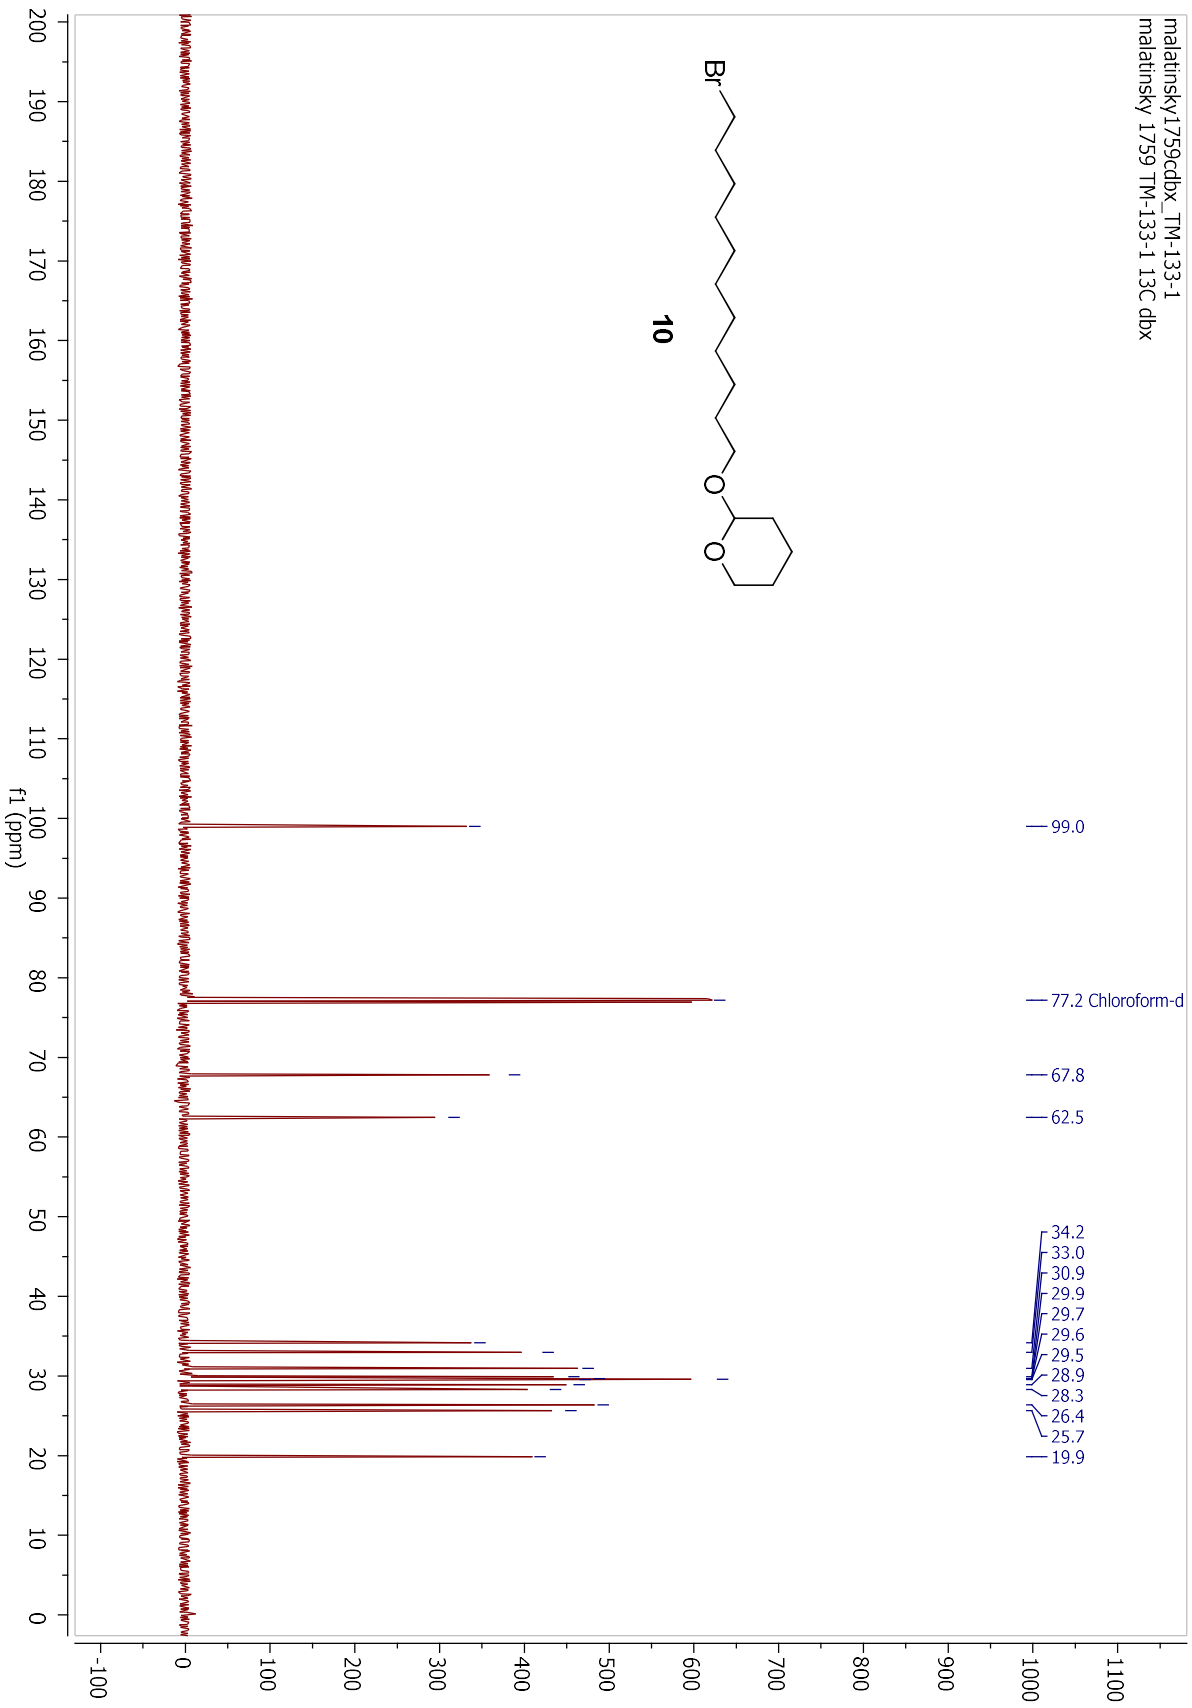

malatinsky1760hdbx\_TM-137-1  
malatinsky 1760 TM-137-1 1H dbx

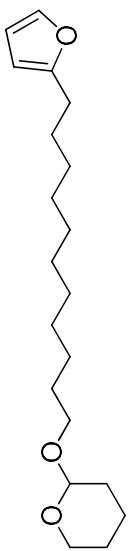

11

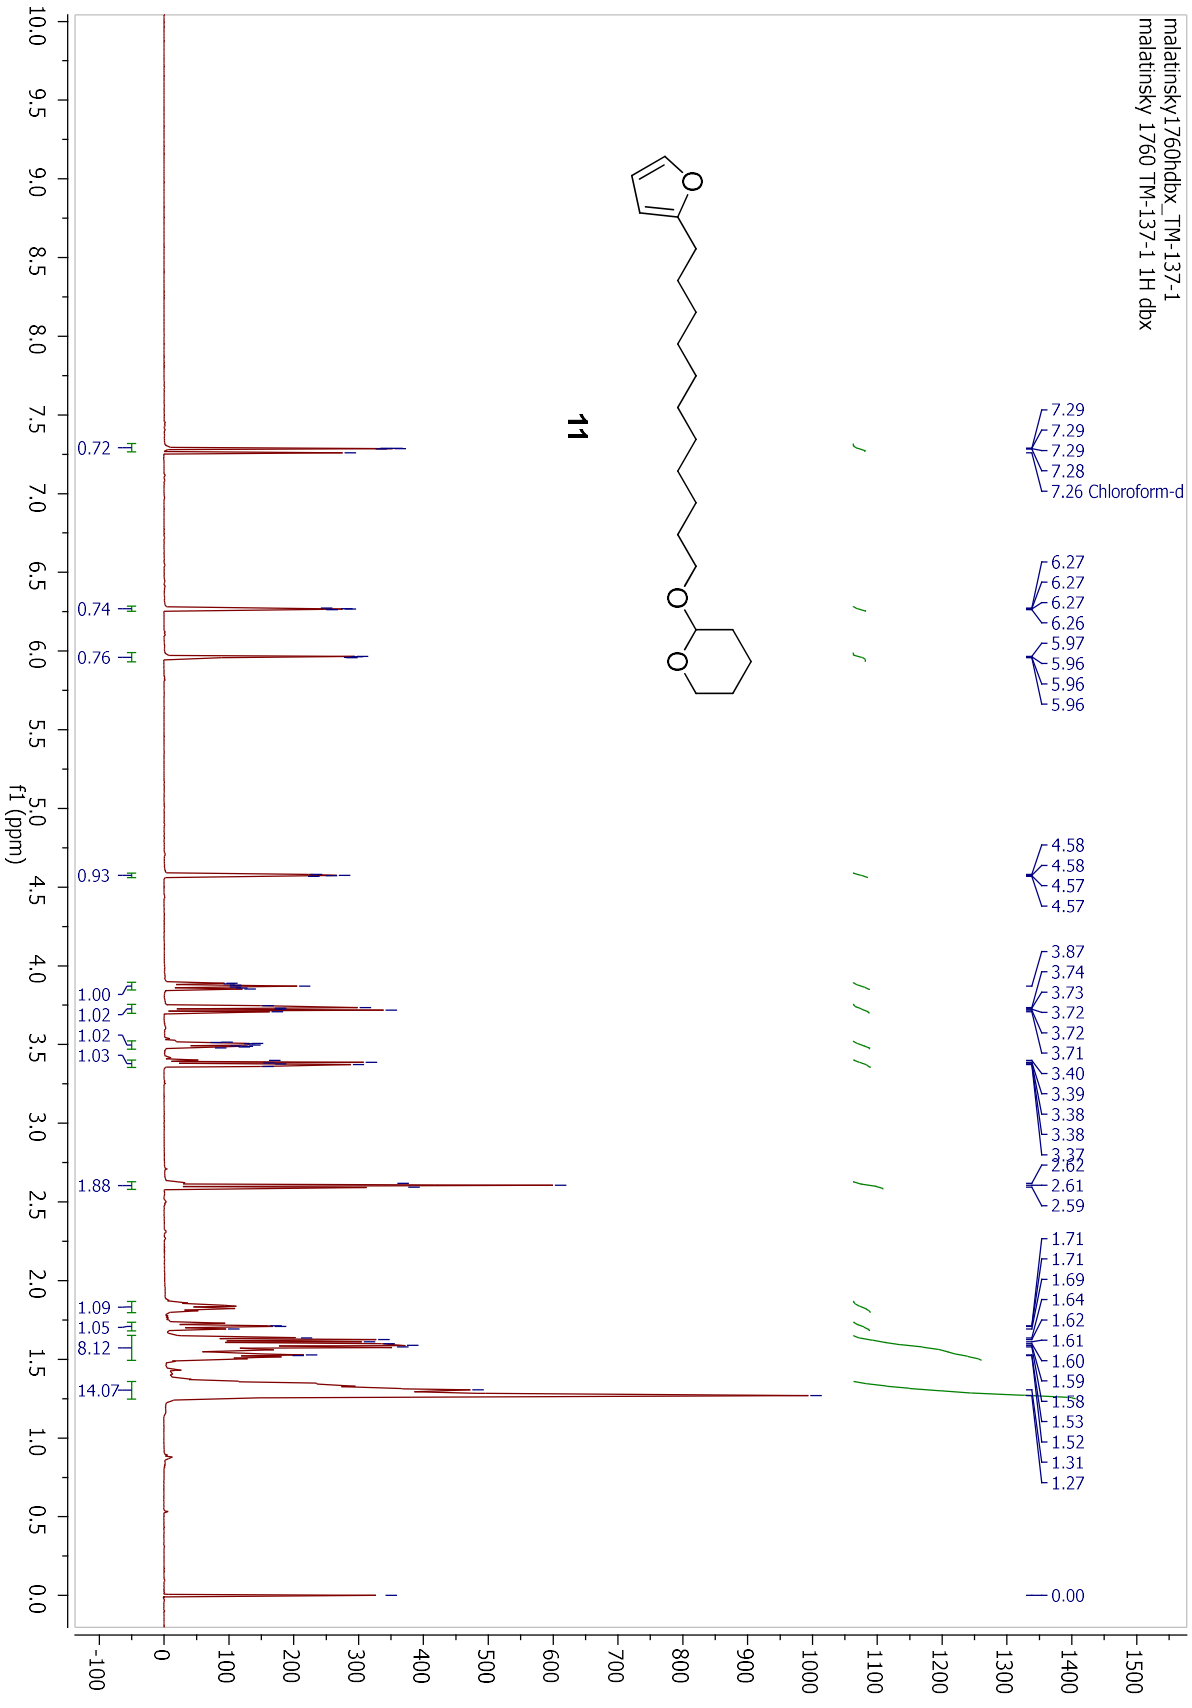



malatinsky1760cdbx\_TM-137-1  
malatinsky 1760 TM-137-1 13C dbx

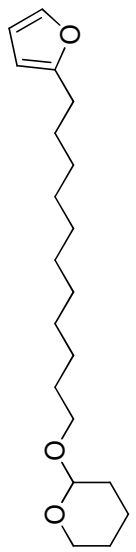

11

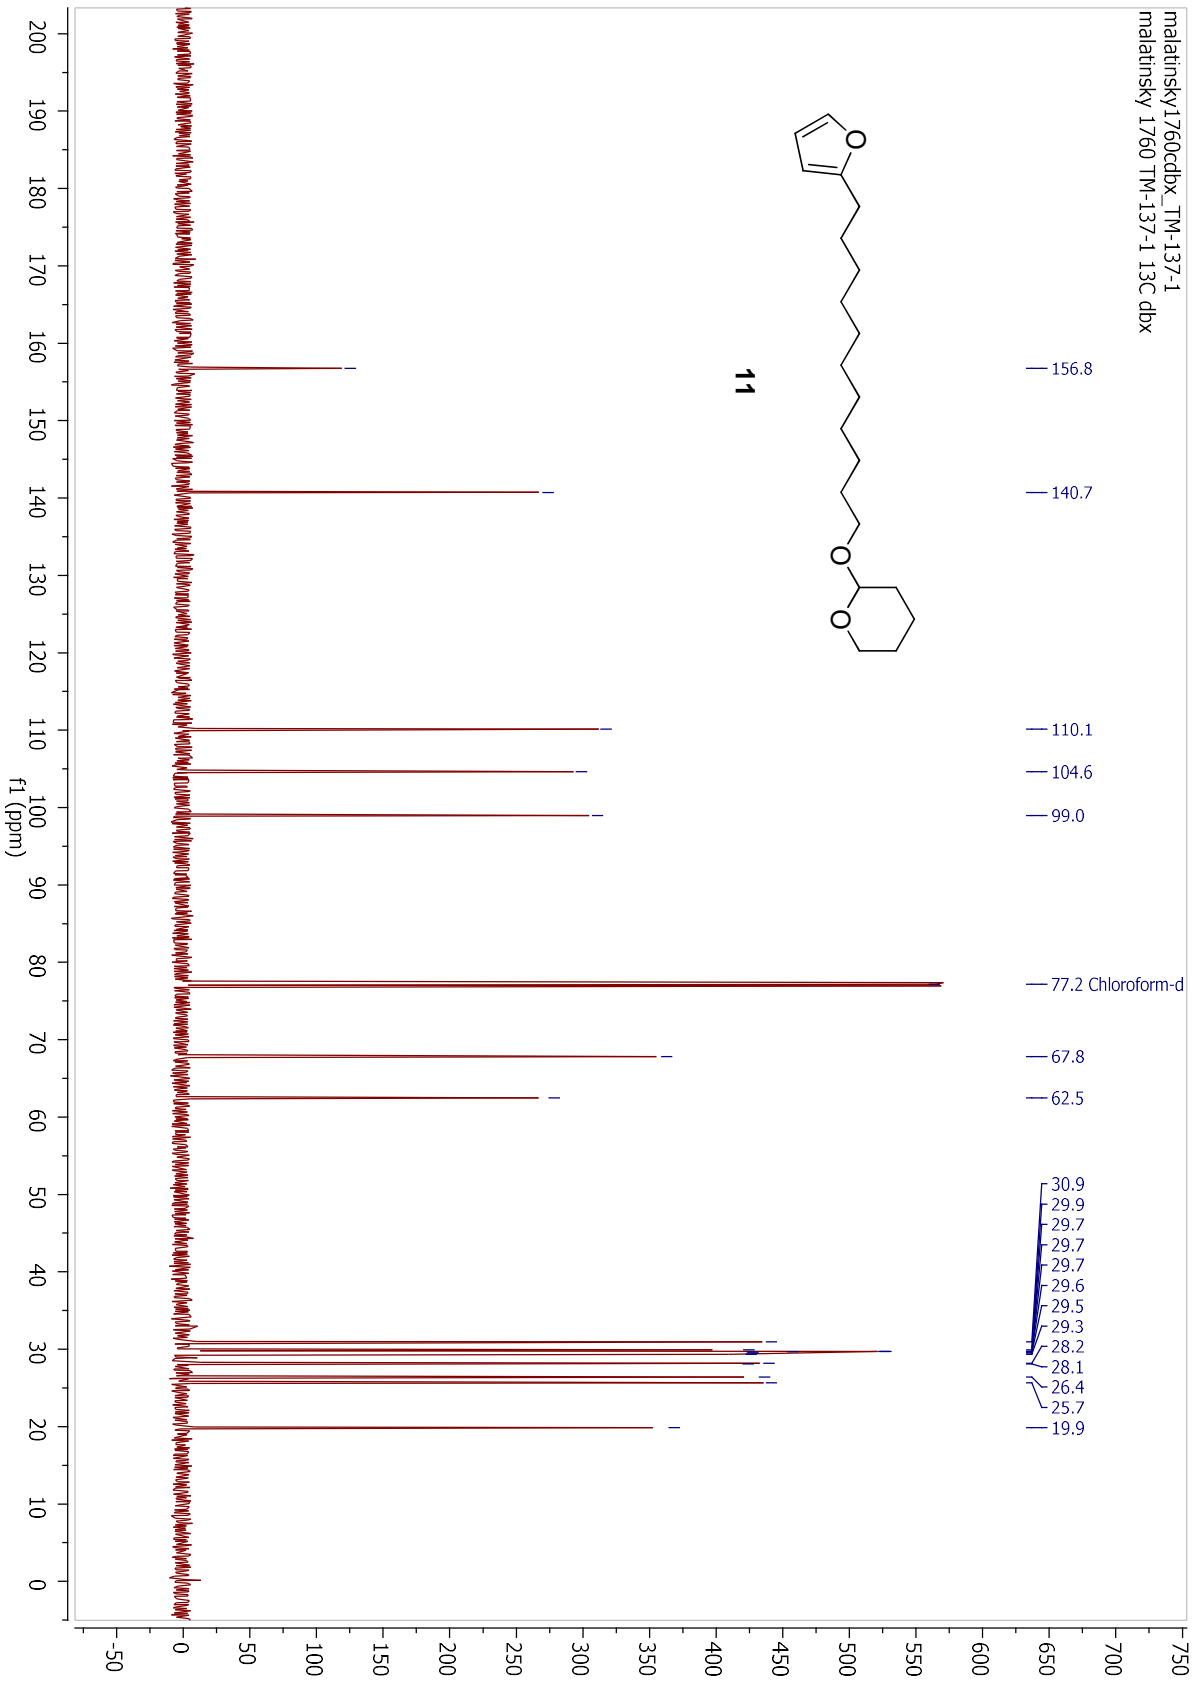

malatinsky1816hdbx\_TM-139-2-P  
malatinsky 1816 TM-139-2-P 1H dbx

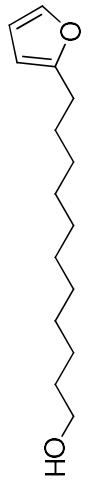

12

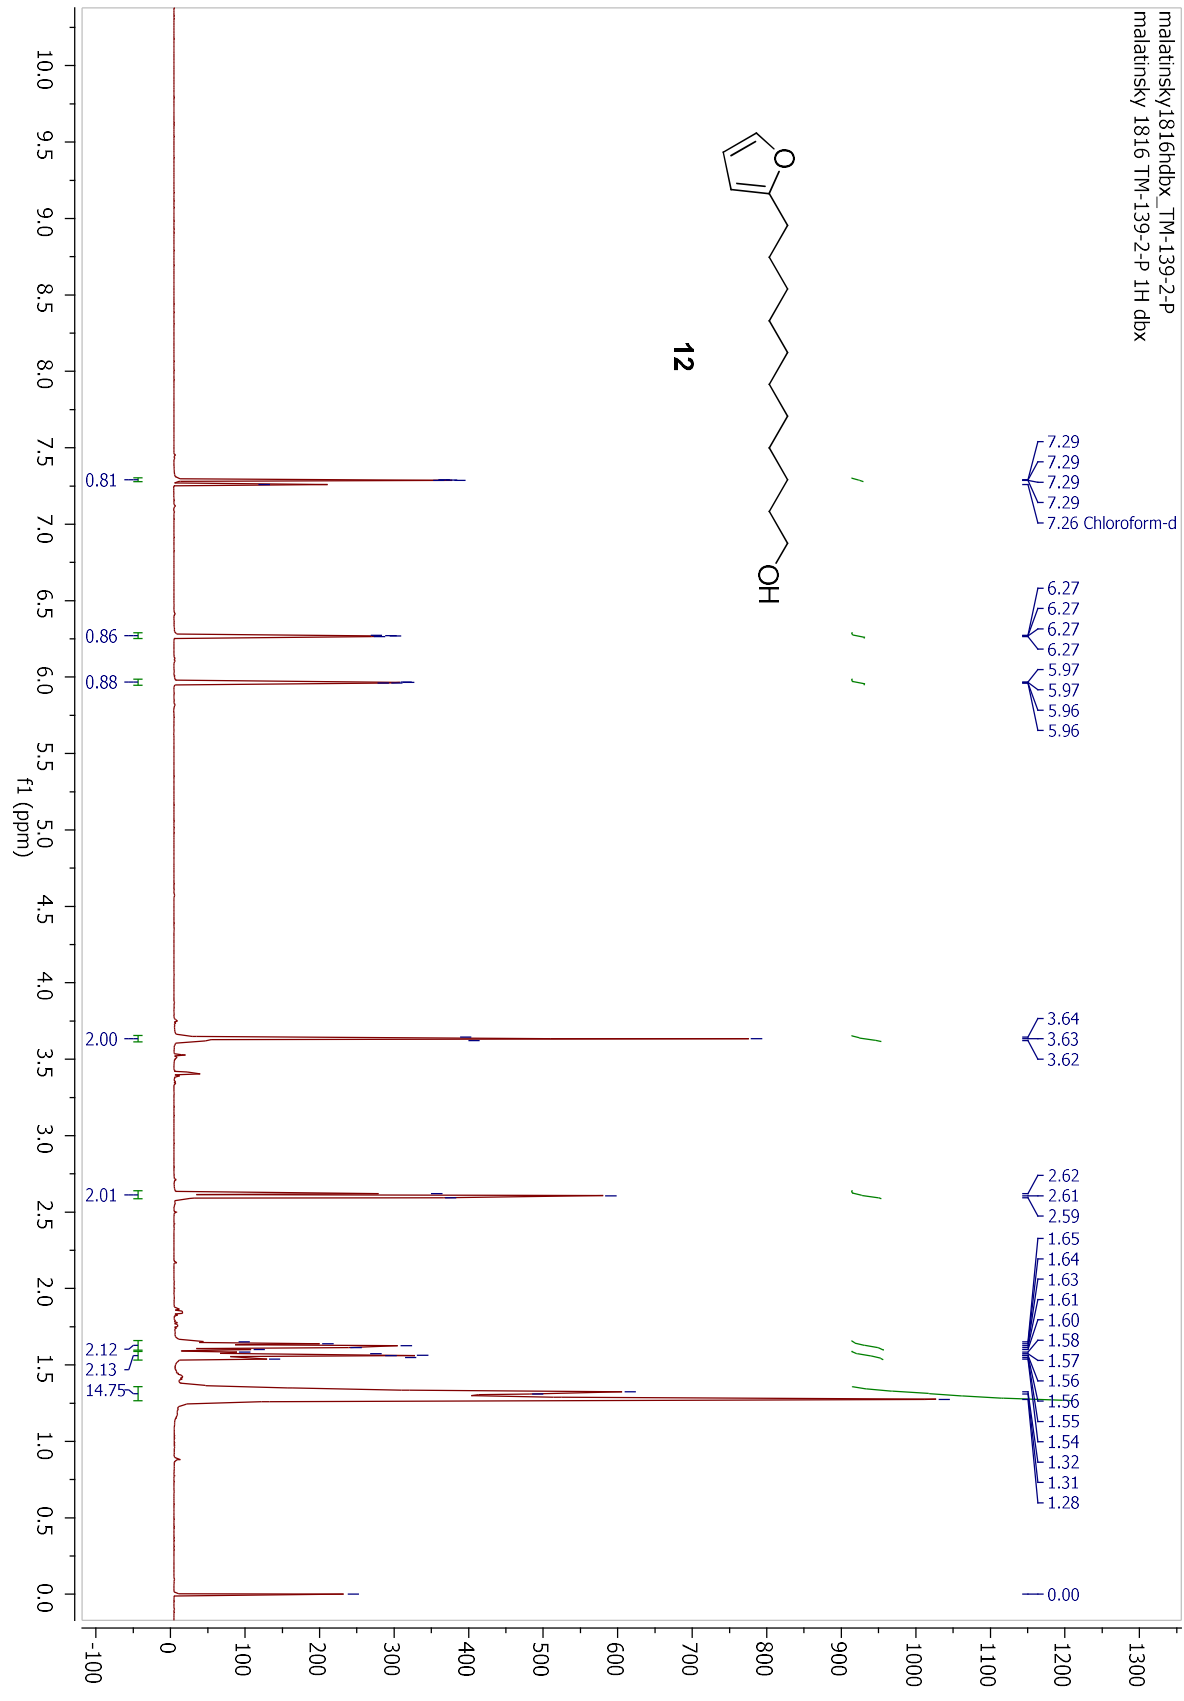

malatinsky1816cdbx\_TM-139-2-P  
malatinsky 1816 TM-139-2-P 13C dbx

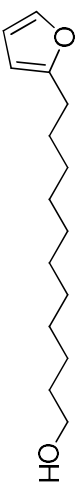

12

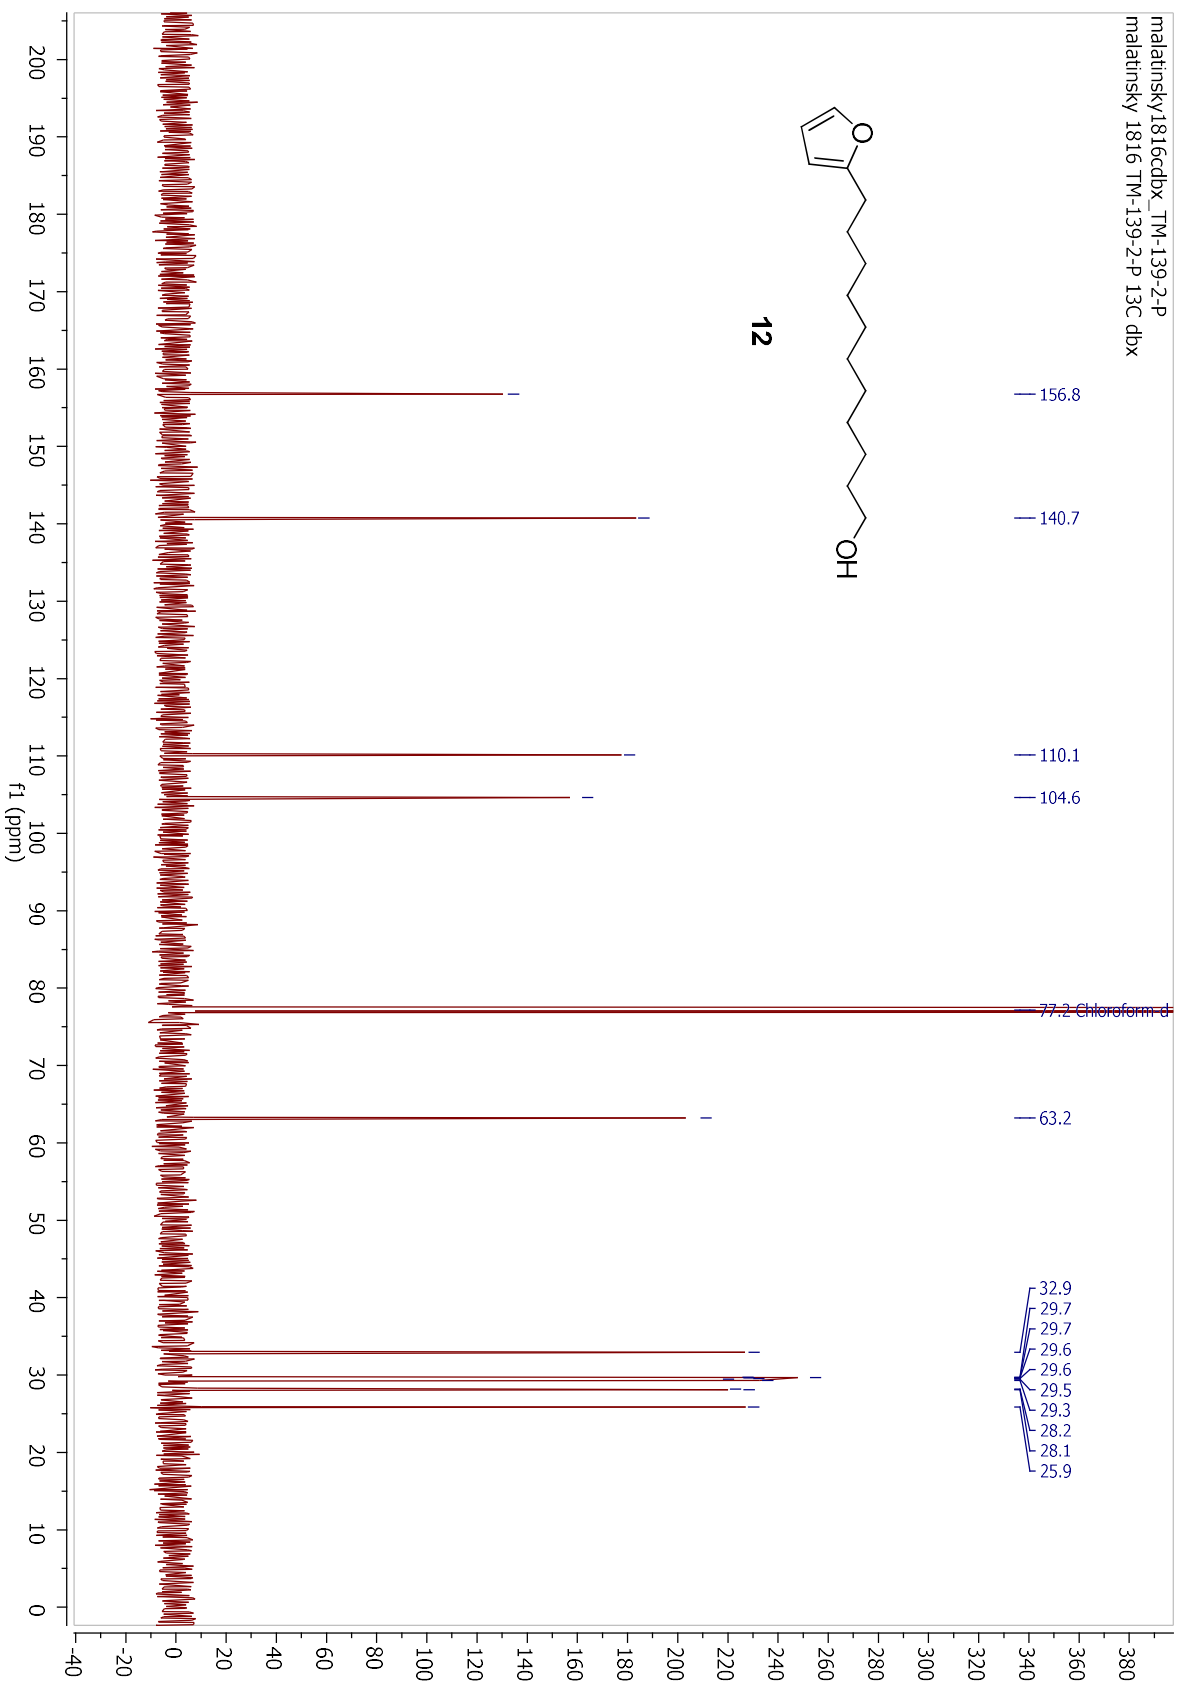

malatinsky1815hdbx\_TM-50-P  
malatinsky 1815 TM-50-P 1H dbx

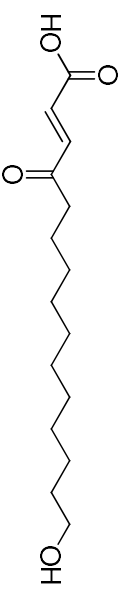

14

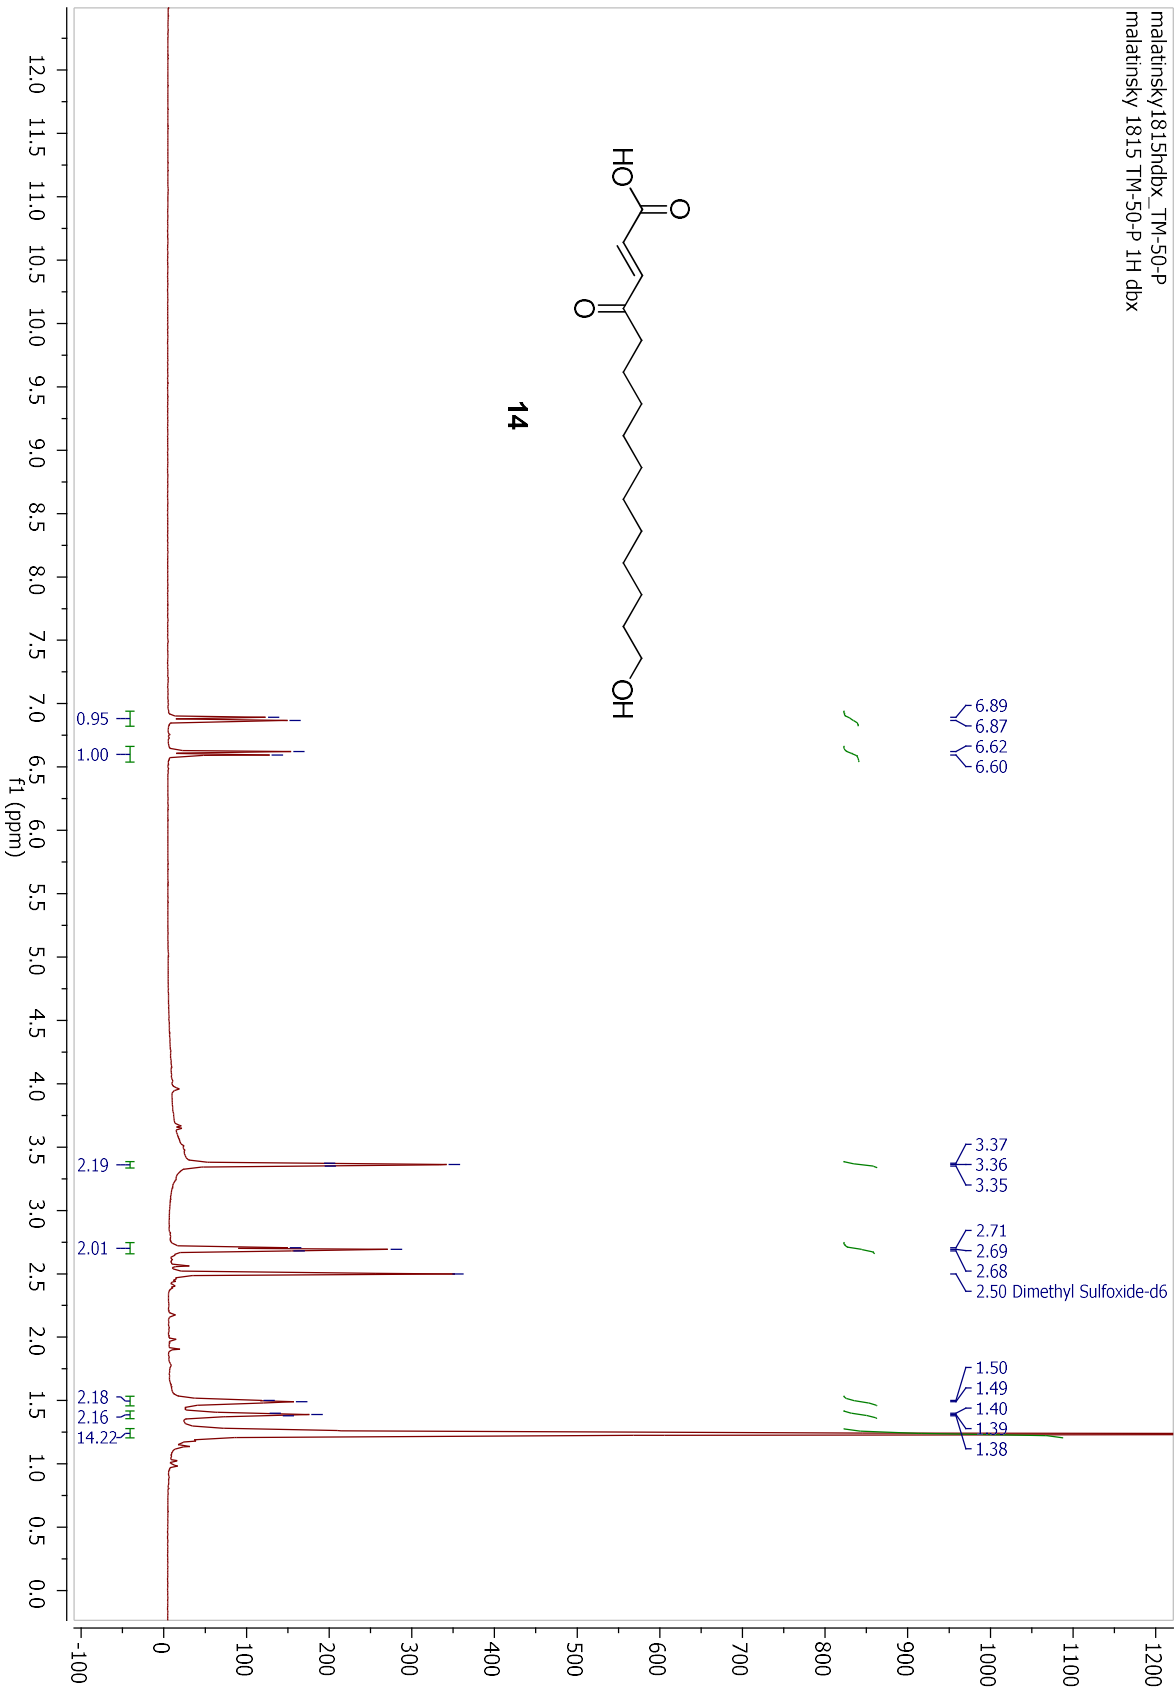

malatinsky1815cdbx\_TM-50-P  
malatinsky 1815 TM-50-P 13C dbx

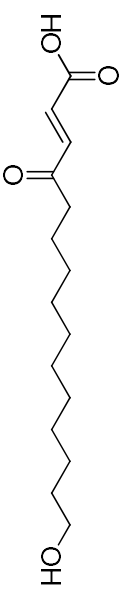

14

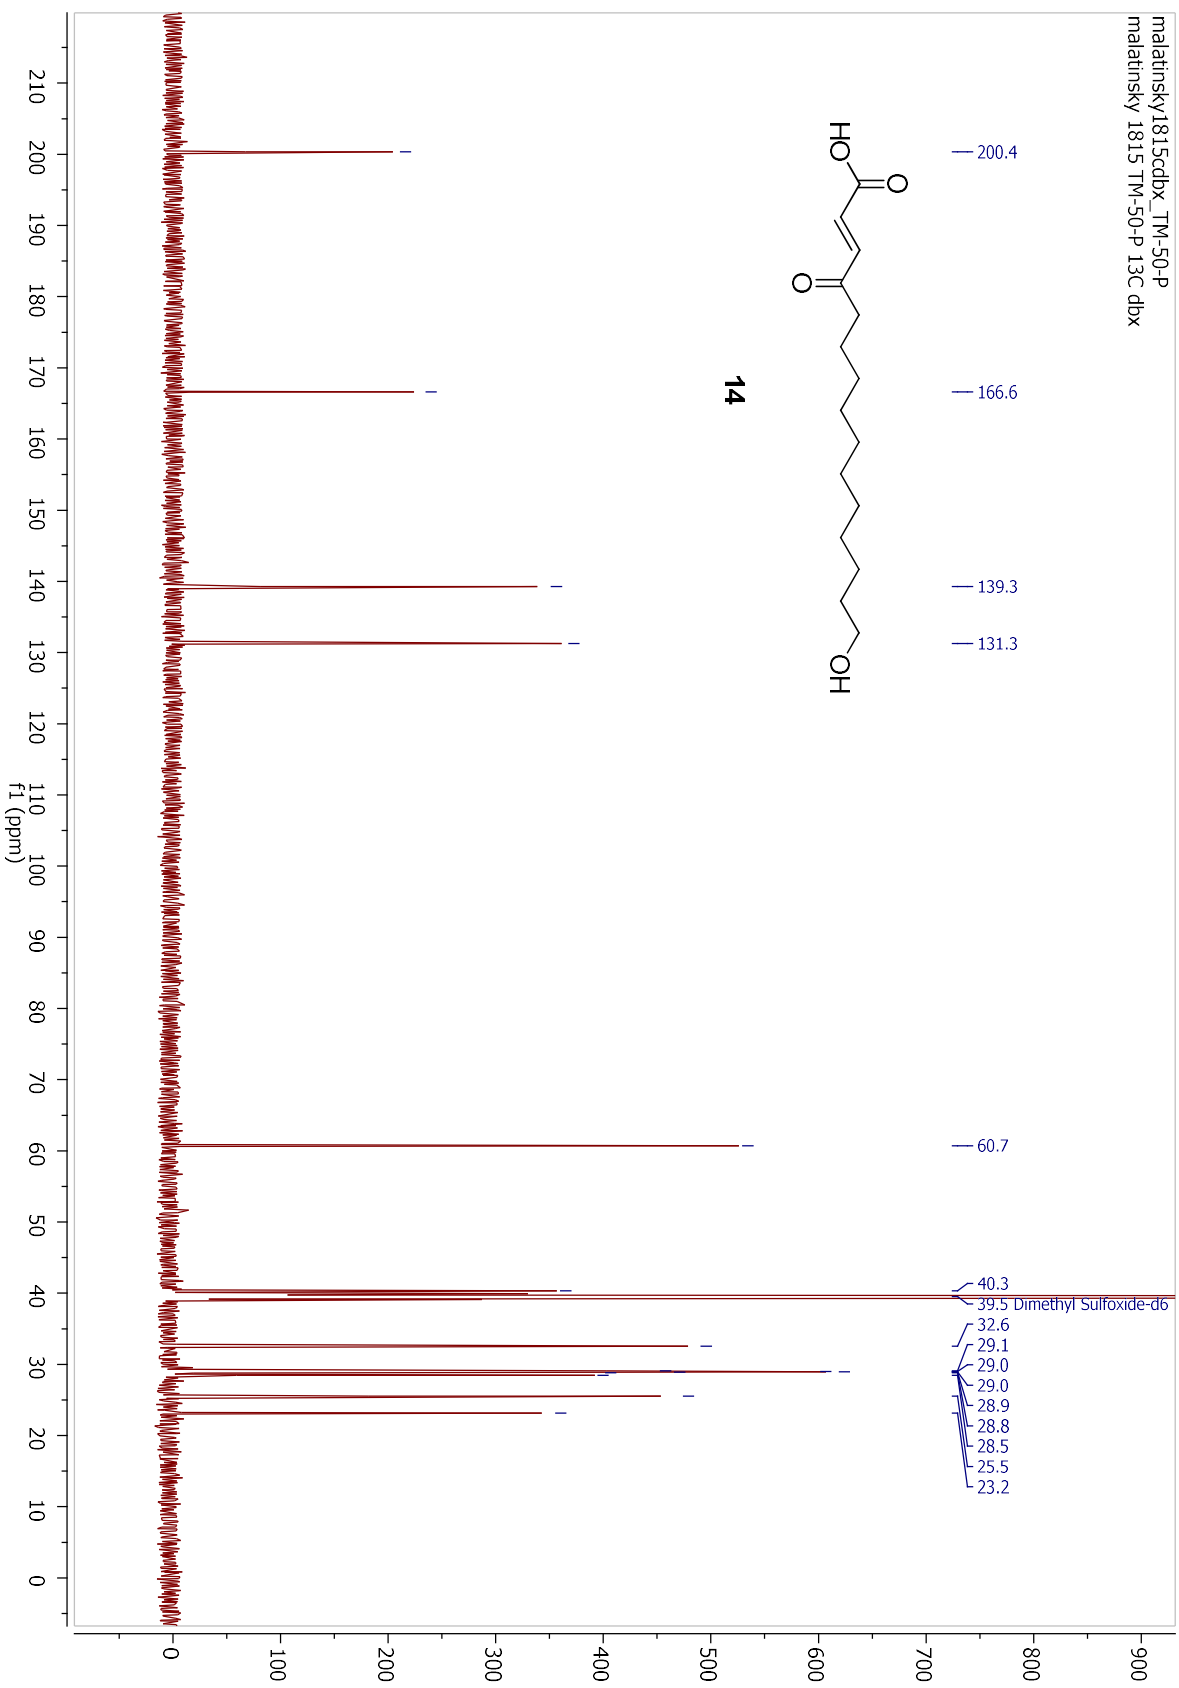

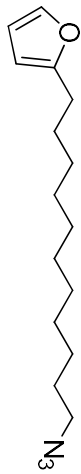

15

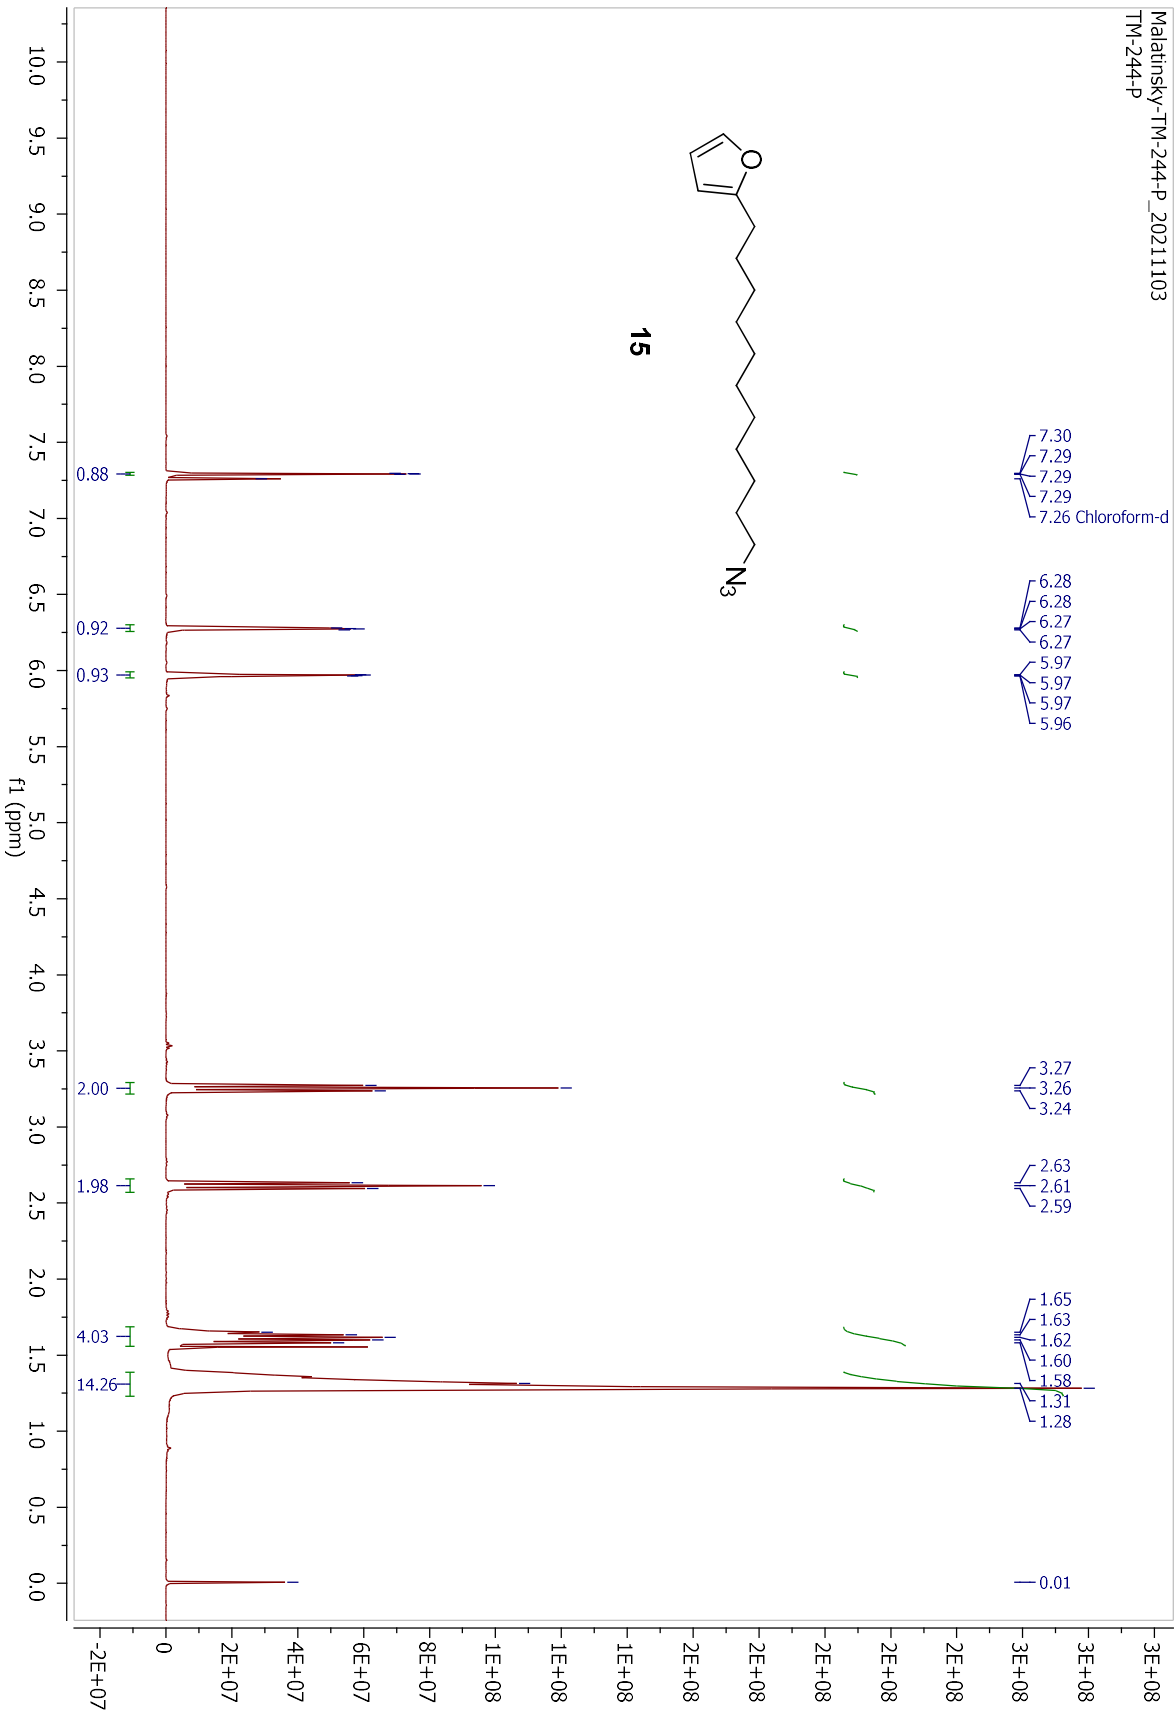

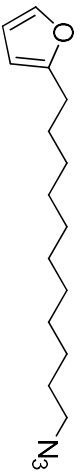

15

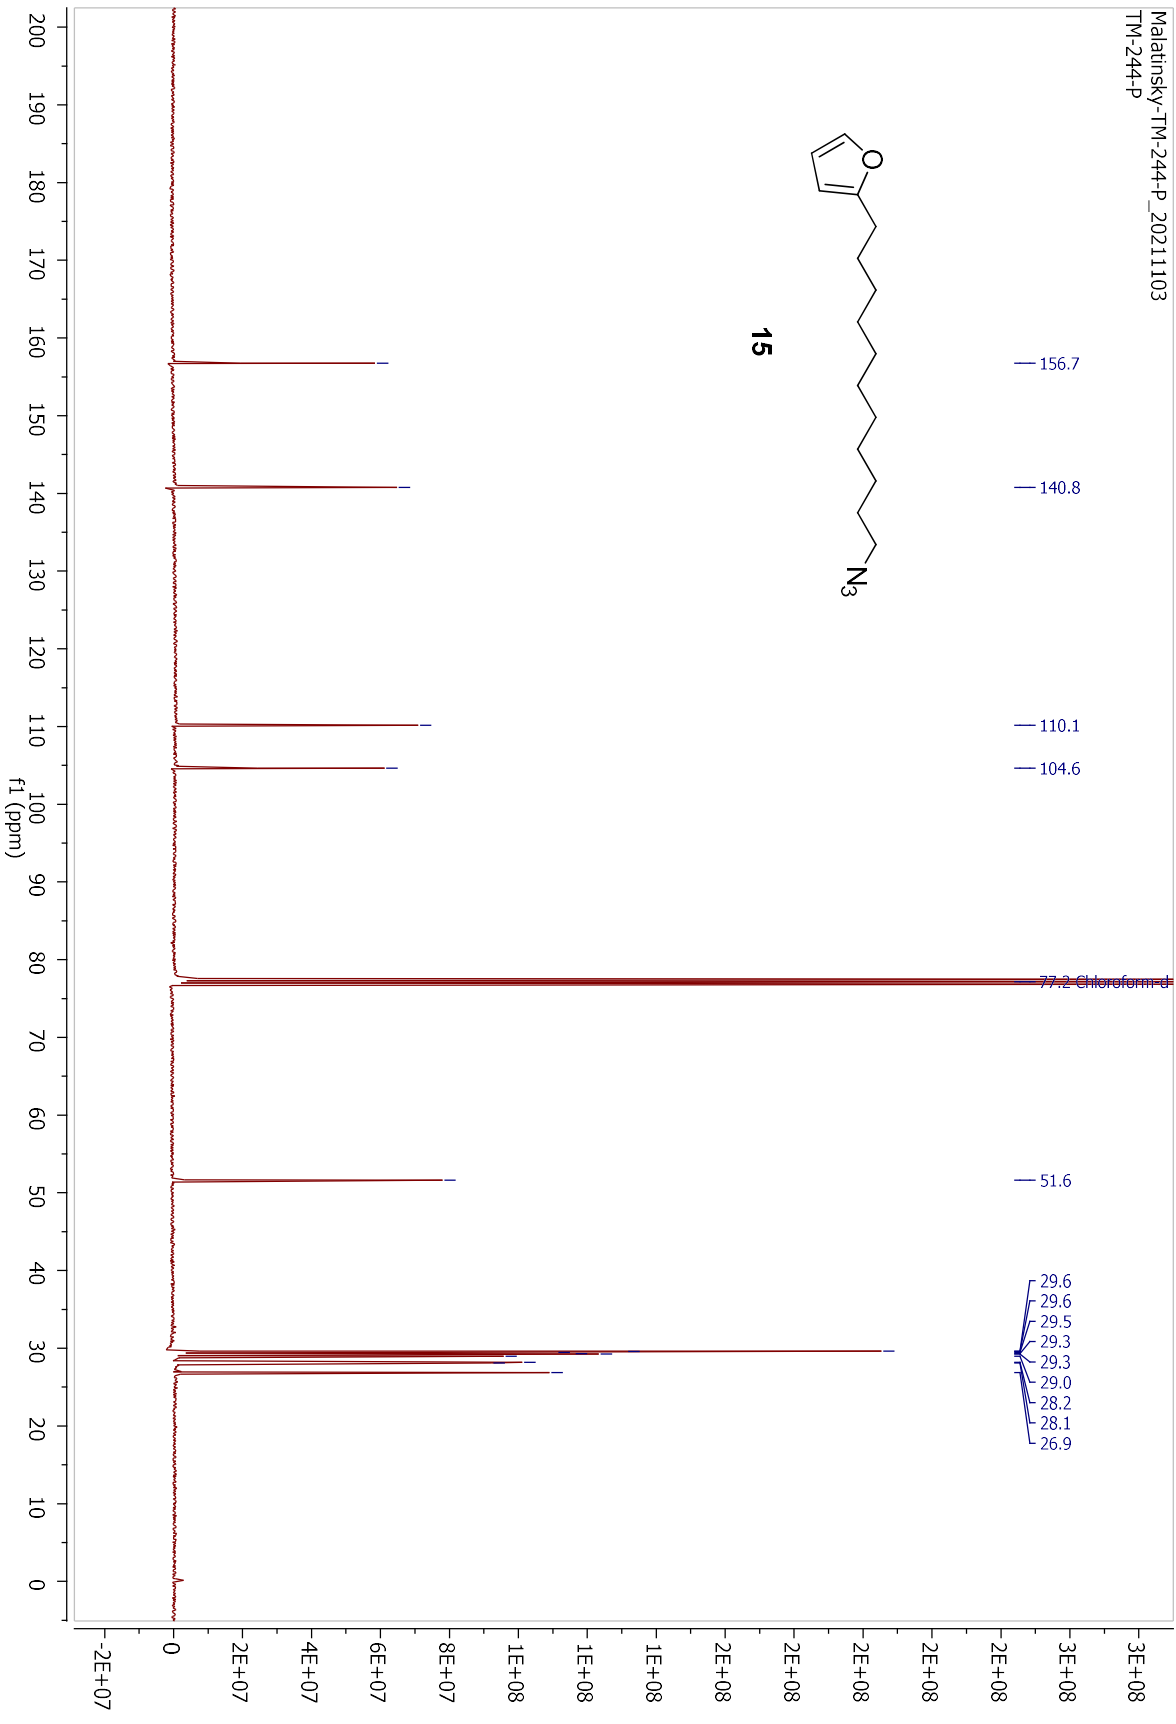

malatinsky\_0725\_TM-247-p1  
Bruker 400 MHz  
malatinsky\_0725\_TM-247-p1  
CDCl3  
28 Feb 2022

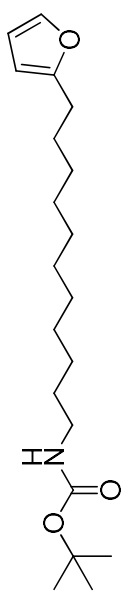

16

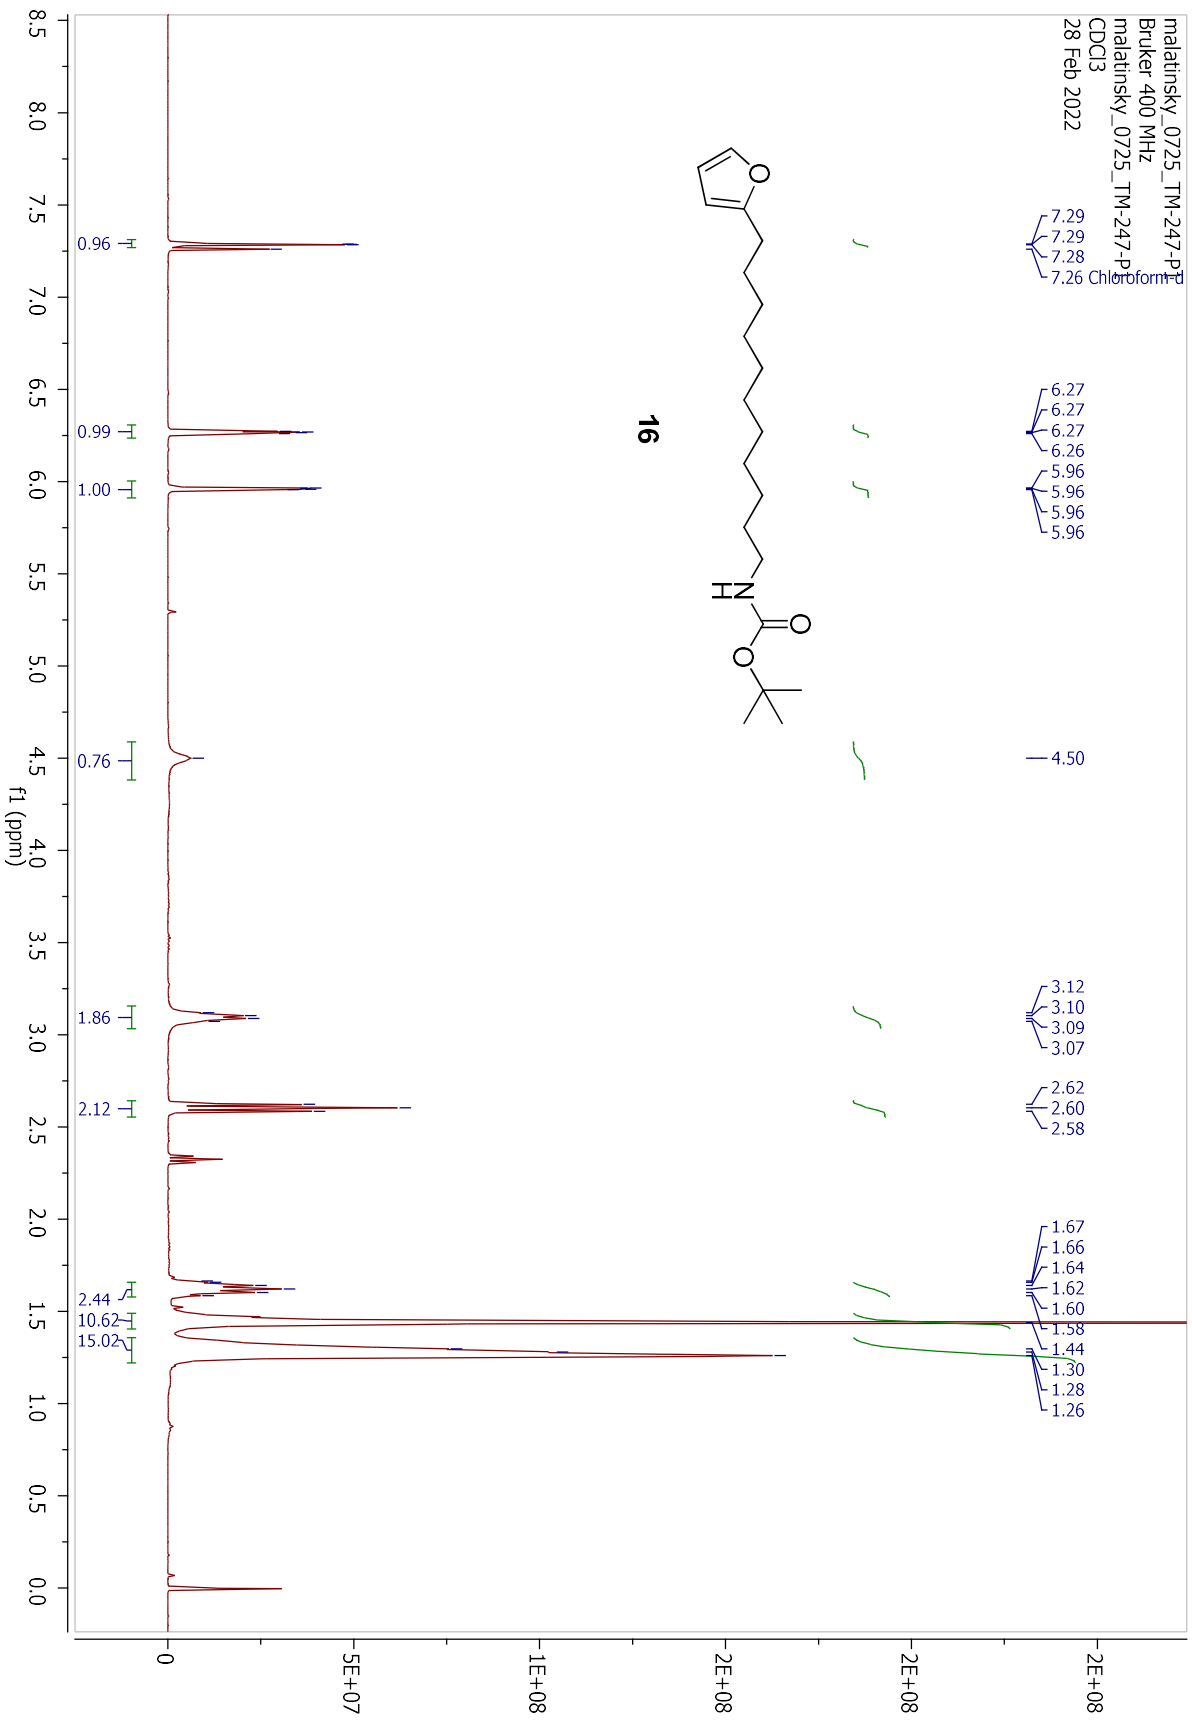



malatinsky\_0725\_TM-247-p1  
Bruker 400 MHz  
malatinsky\_0725\_TM-247-p1  
CDCl3  
1 Mar 2022

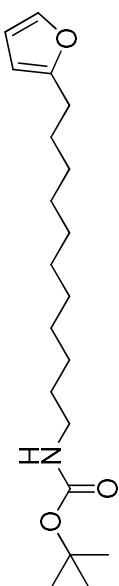

16

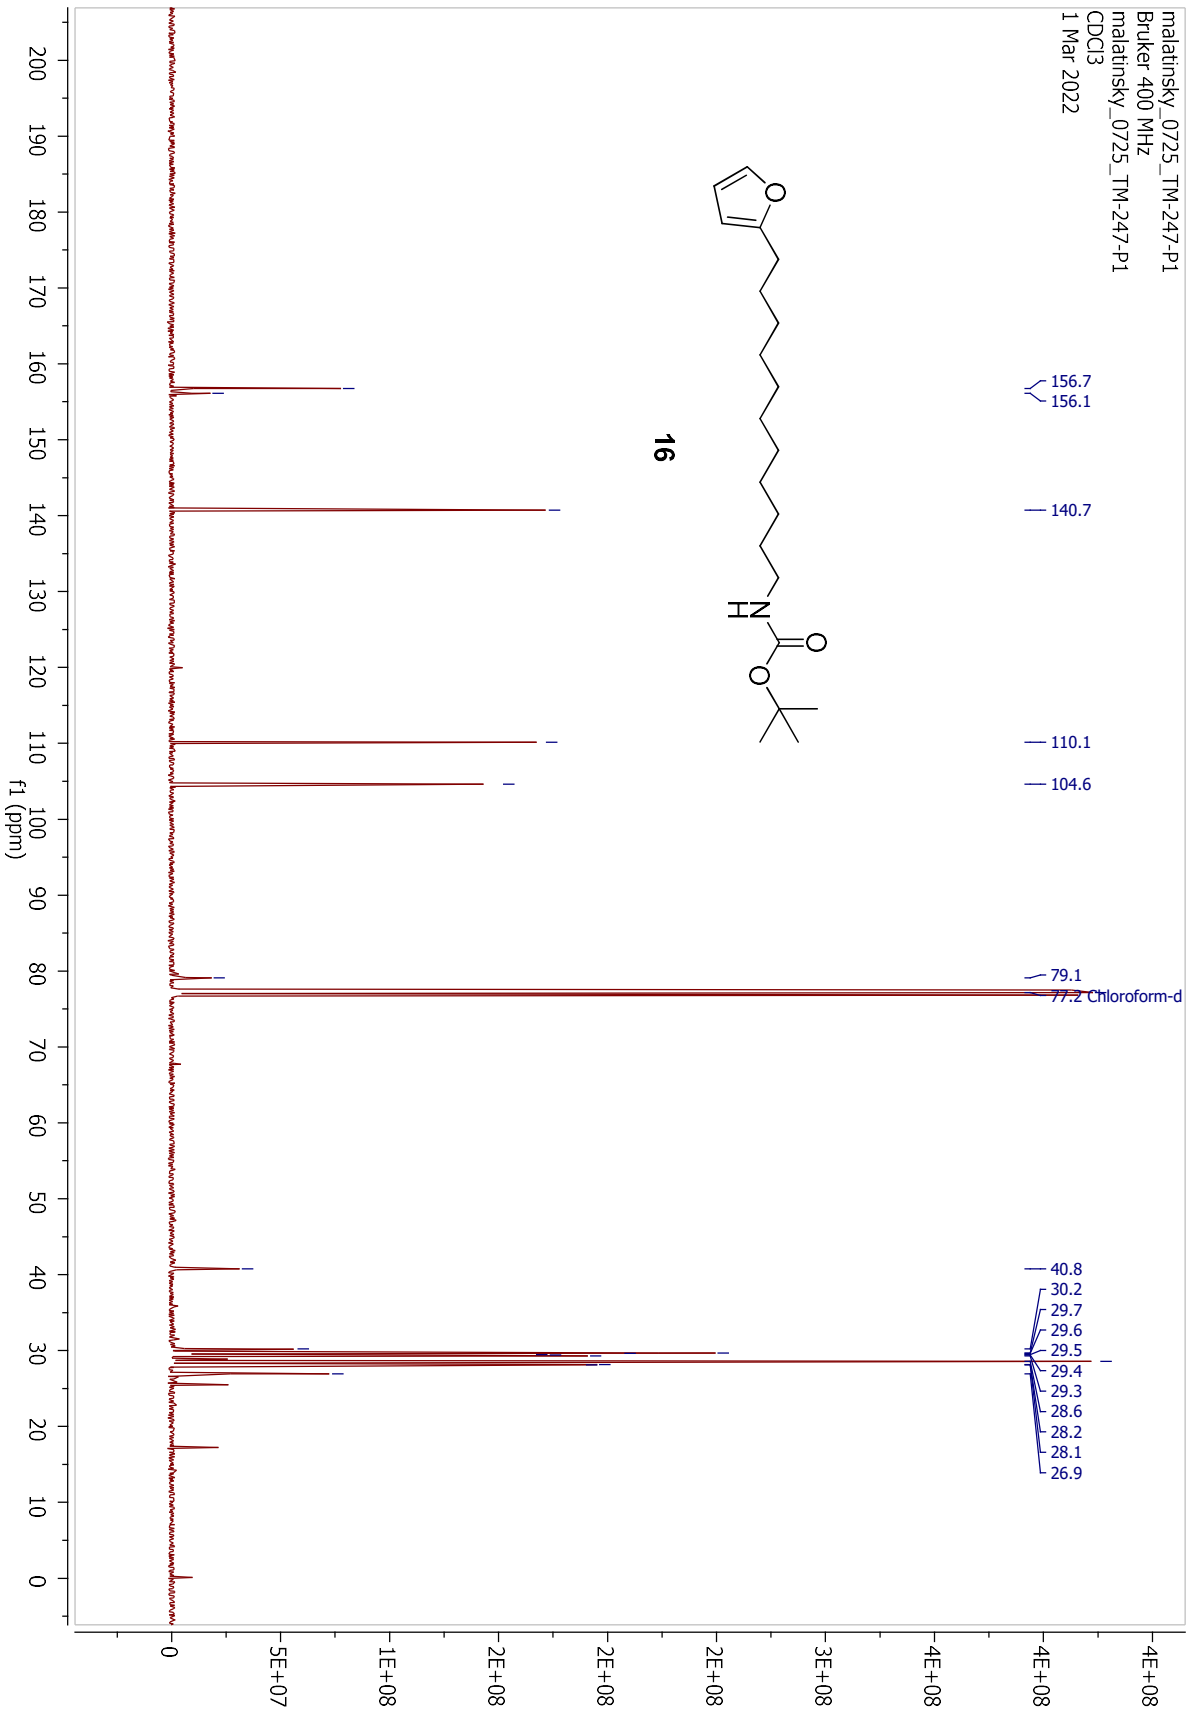

malatinsky\_1125\_TM-280-KR-ACN  
Bruker 400 MHz  
malatinsky\_1125\_TM-280-KR-ACN  
CDCl3  
25 Mar 2022

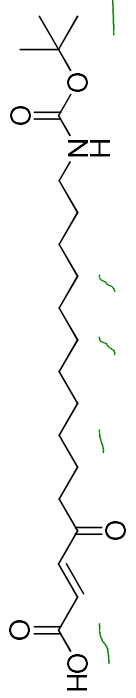

18

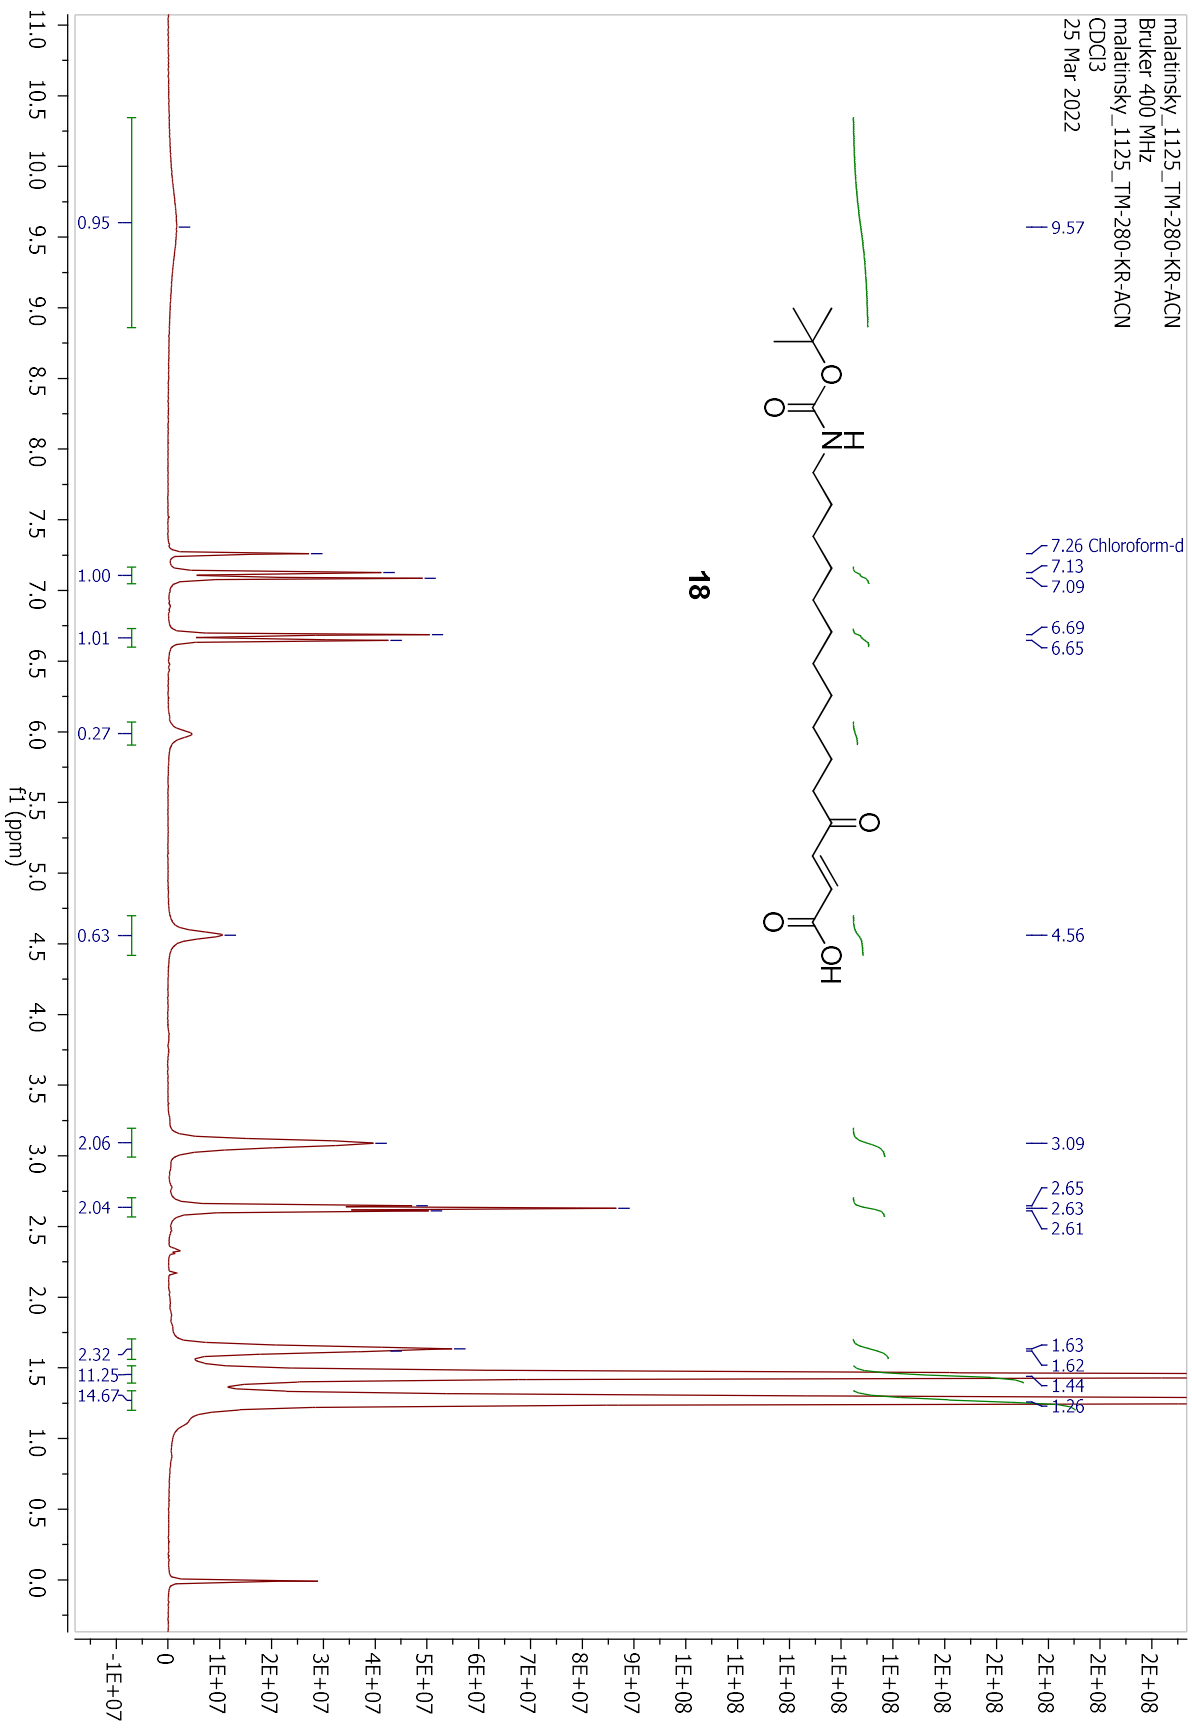

malatinsky\_1125\_TM-280-KR-ACN  
Bruker 400 MHz  
malatinsky\_1125\_TM-280-KR-ACN  
CDCl3  
25 Mar 2022

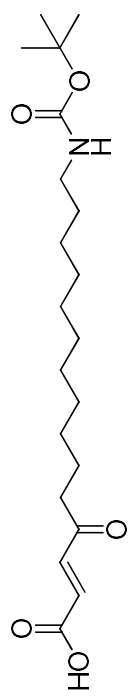

18

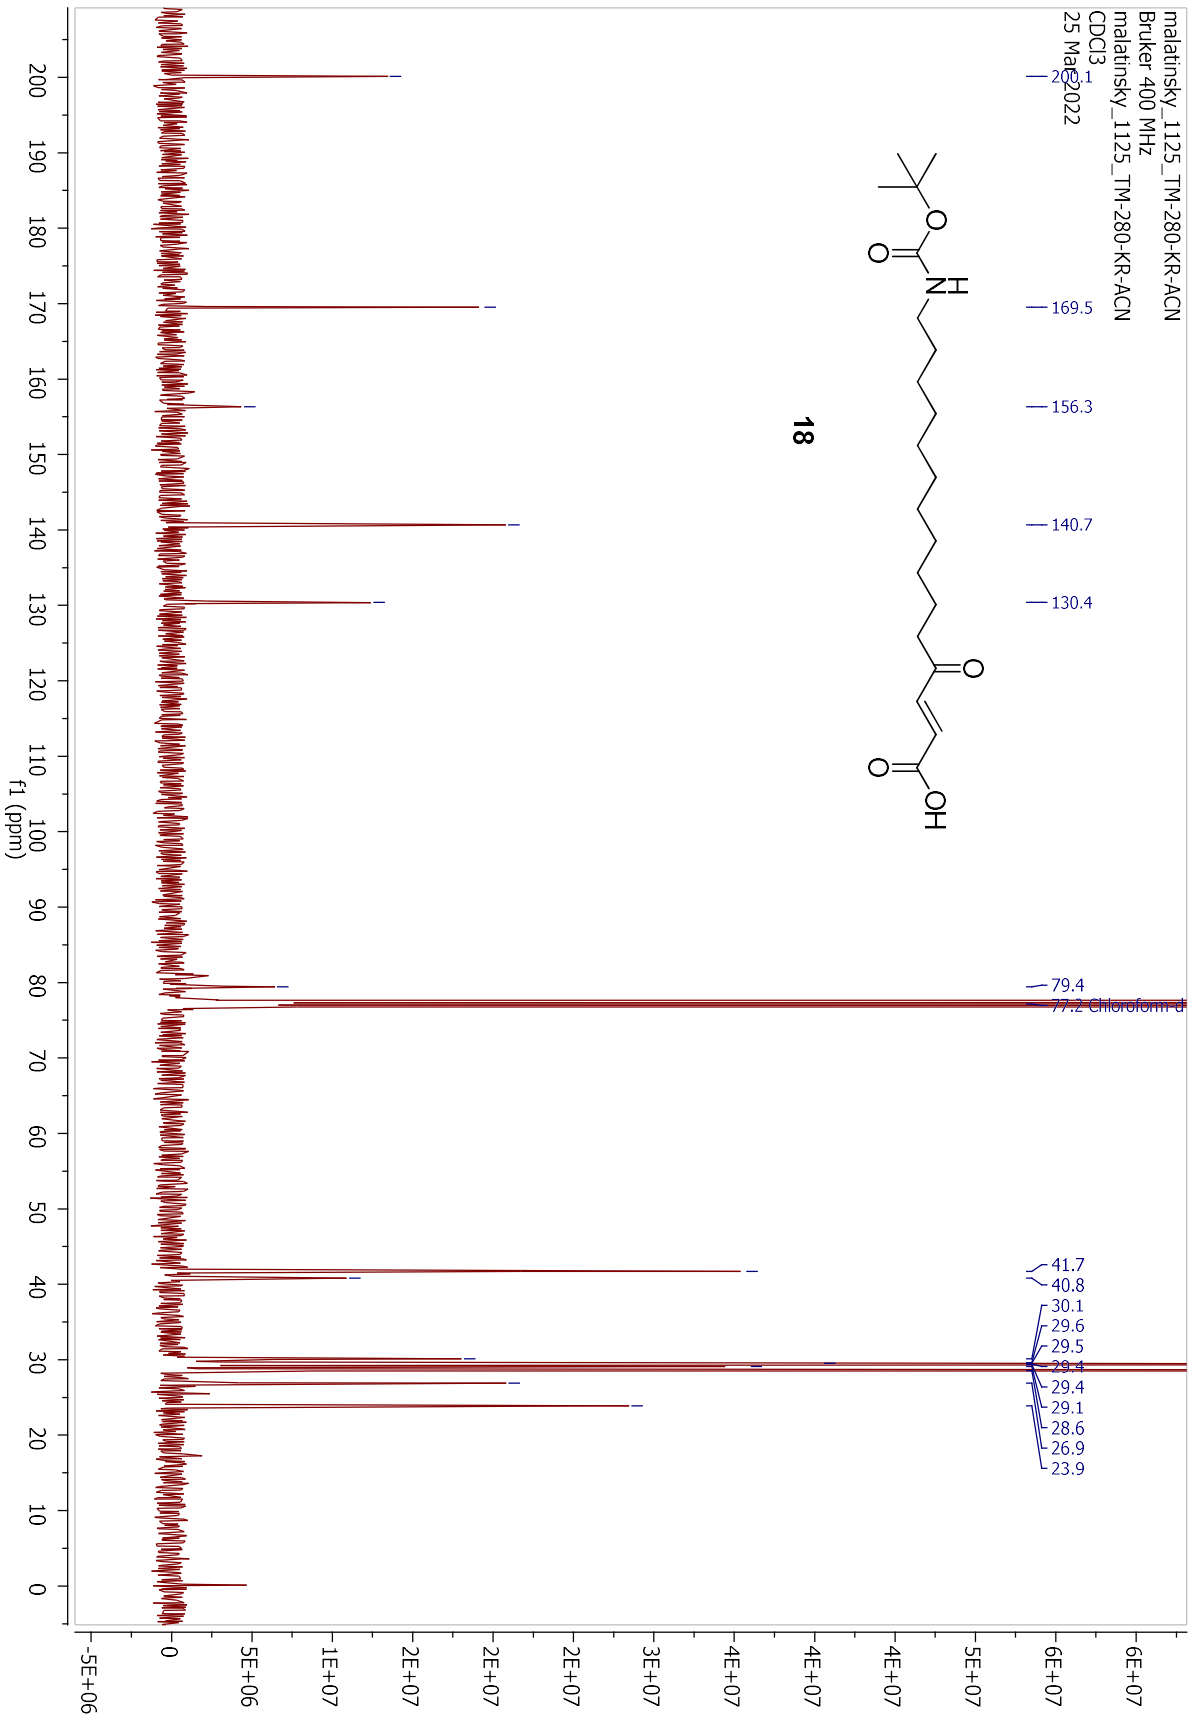

malatinsky2159hdbx\_TM-156-P-NEW  
malatinsky 2159 TM-156-P-NEW 1H dbx

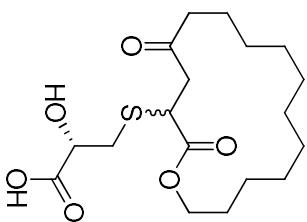

20a,b mixture of diastereomers cca 50:50

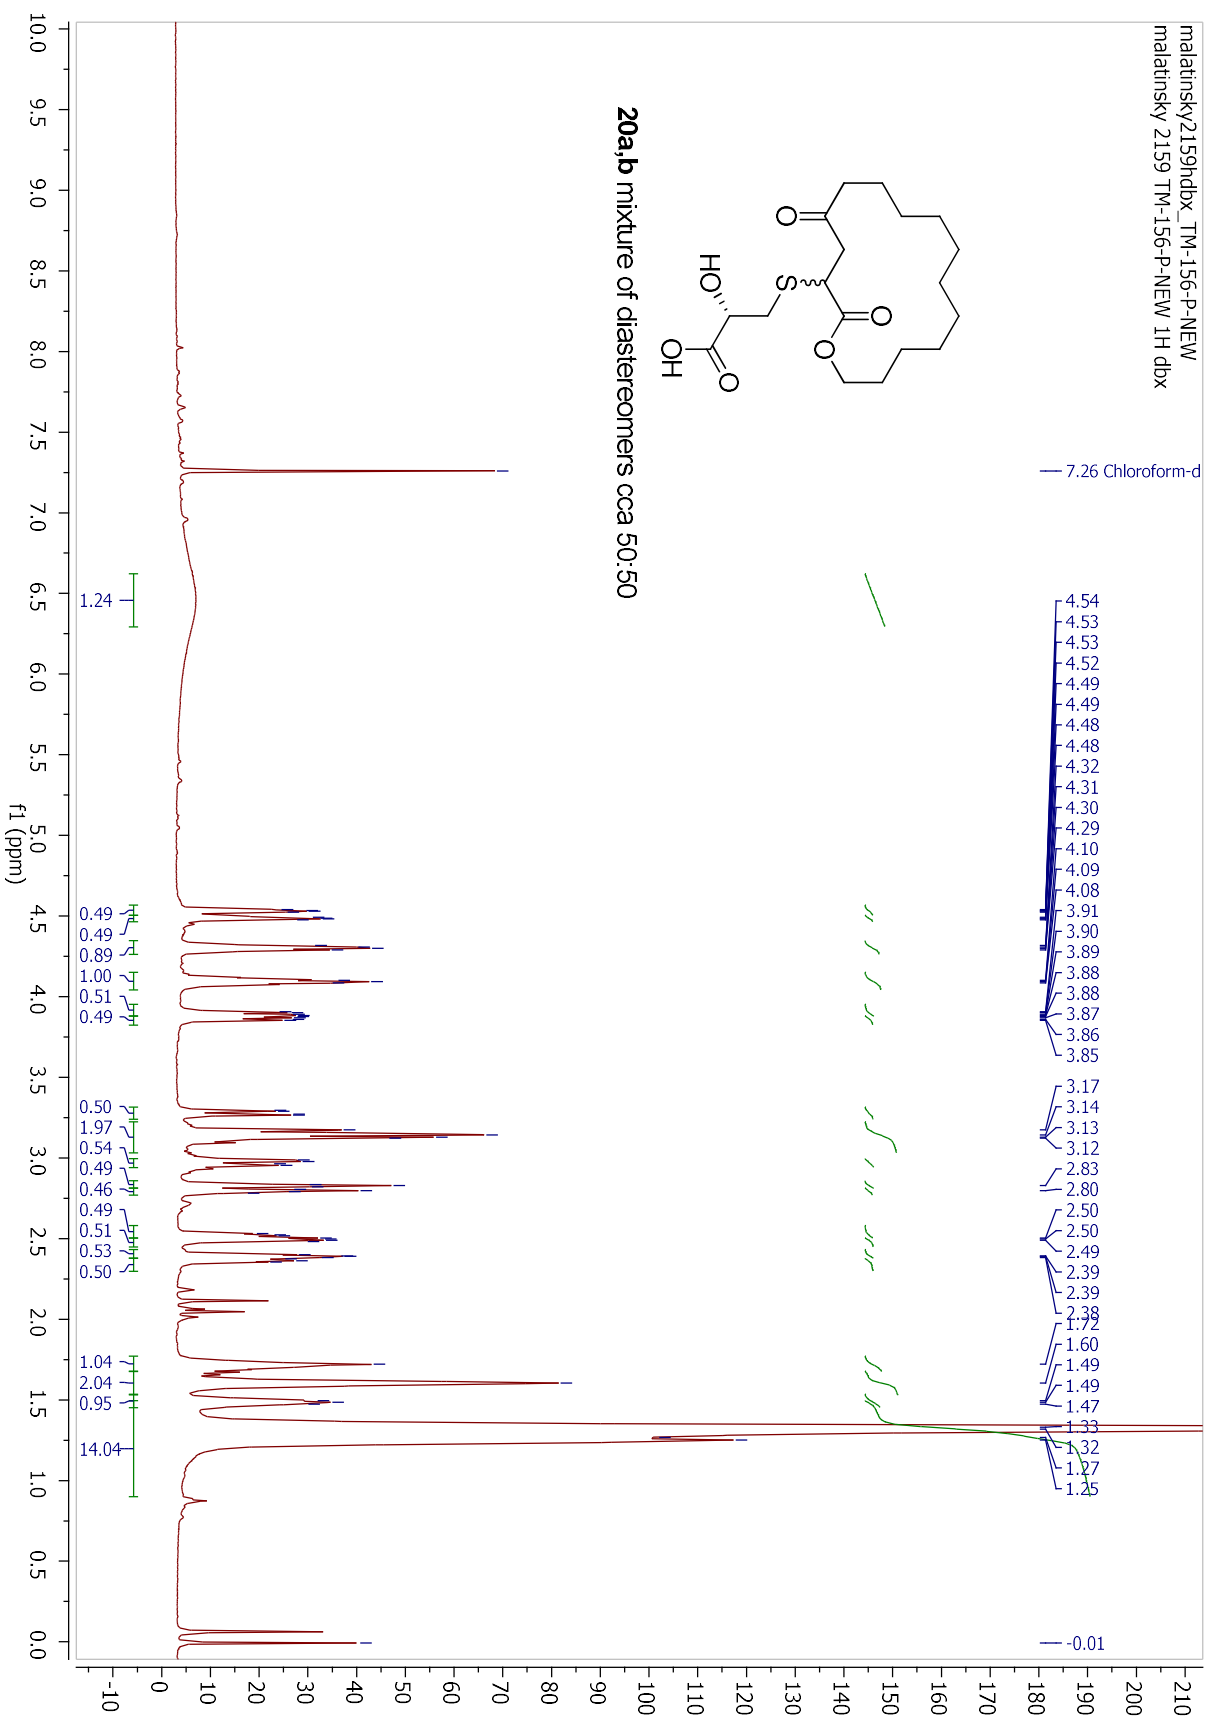

malatinsky2160cdbhx\_TM-156-P  
malatinsky 2160 TM-156-P 13C dbx

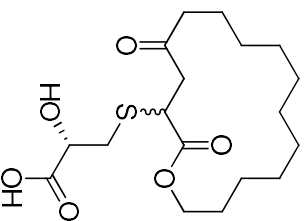

**20a,b** mixture of diastereomers cca 50:50

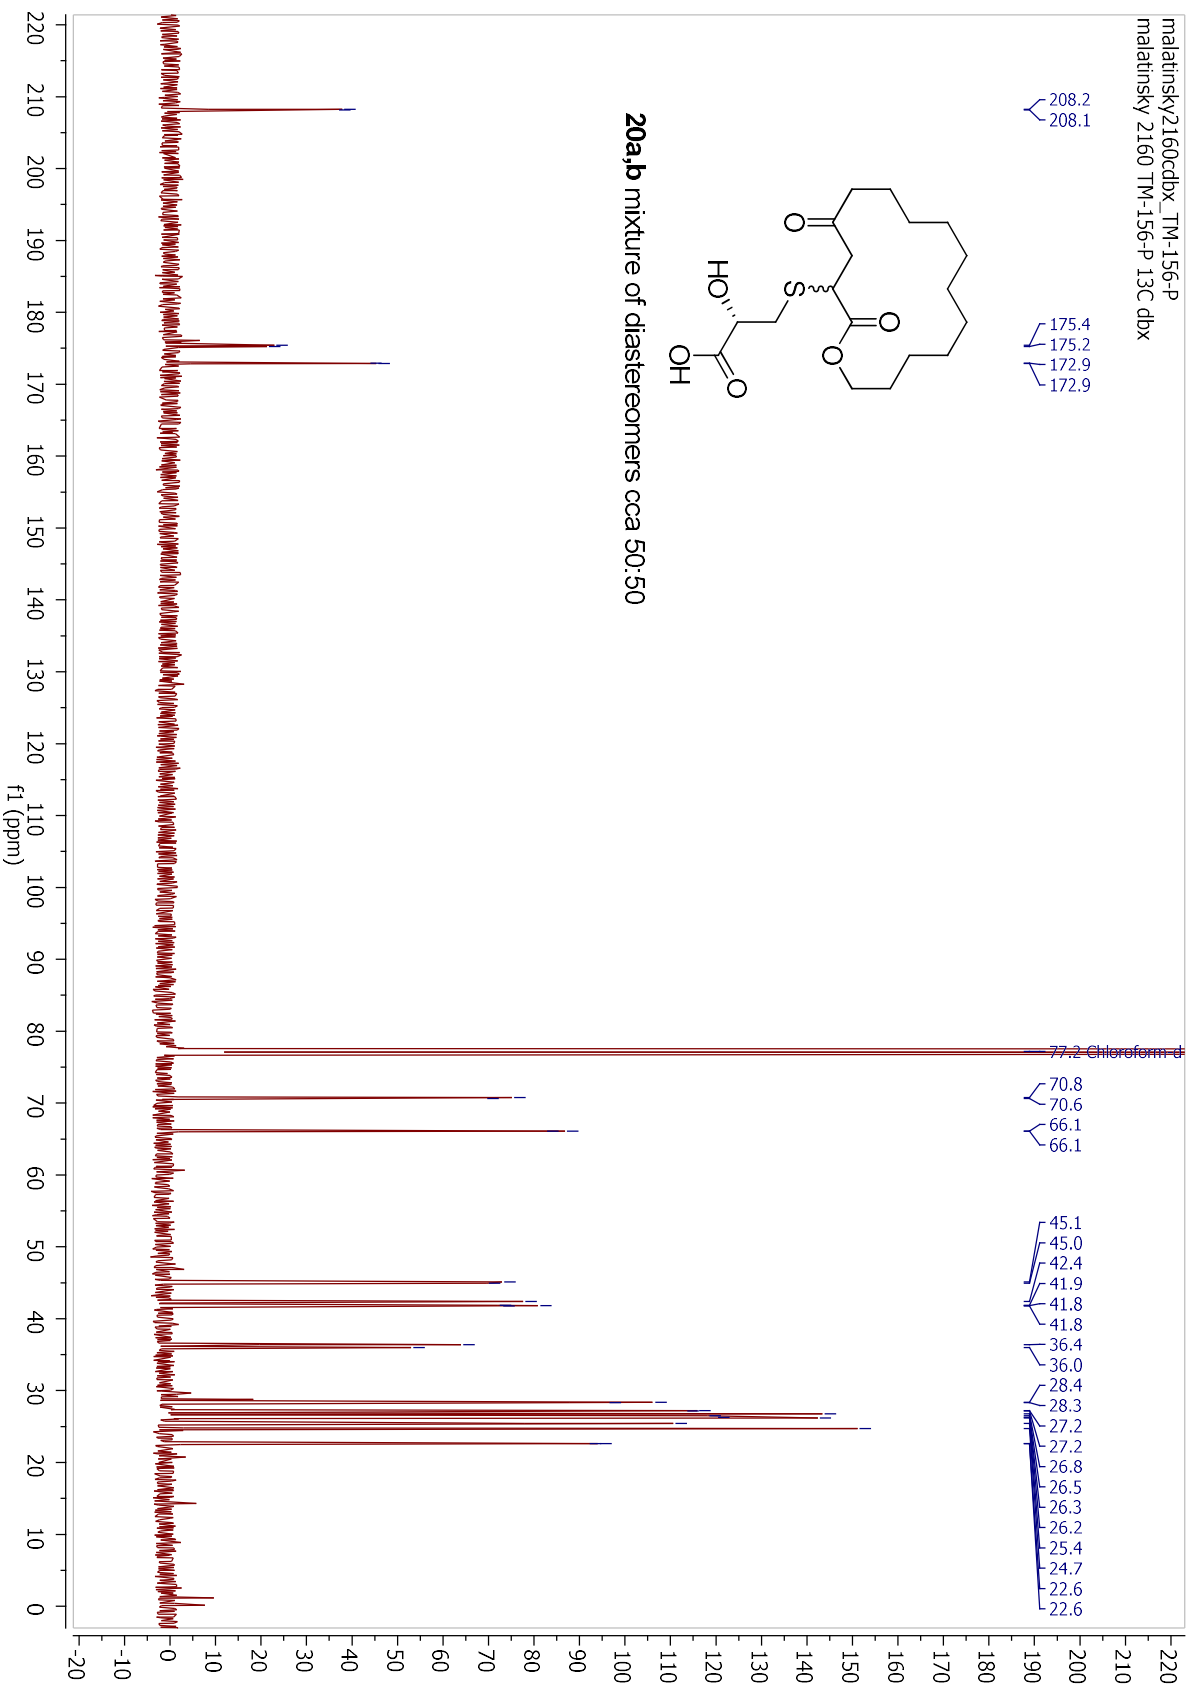

malatinsky\_0928\_TM-286-P\_NEW  
Bruker 400 MHz  
malatinsky\_0928\_TM-286-P  
CD3OD  
14 Mar 2022

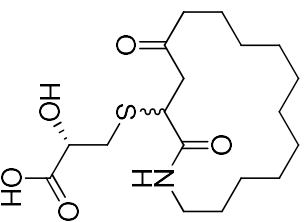

**21a,b** mixture of diastereomers cca 75:25

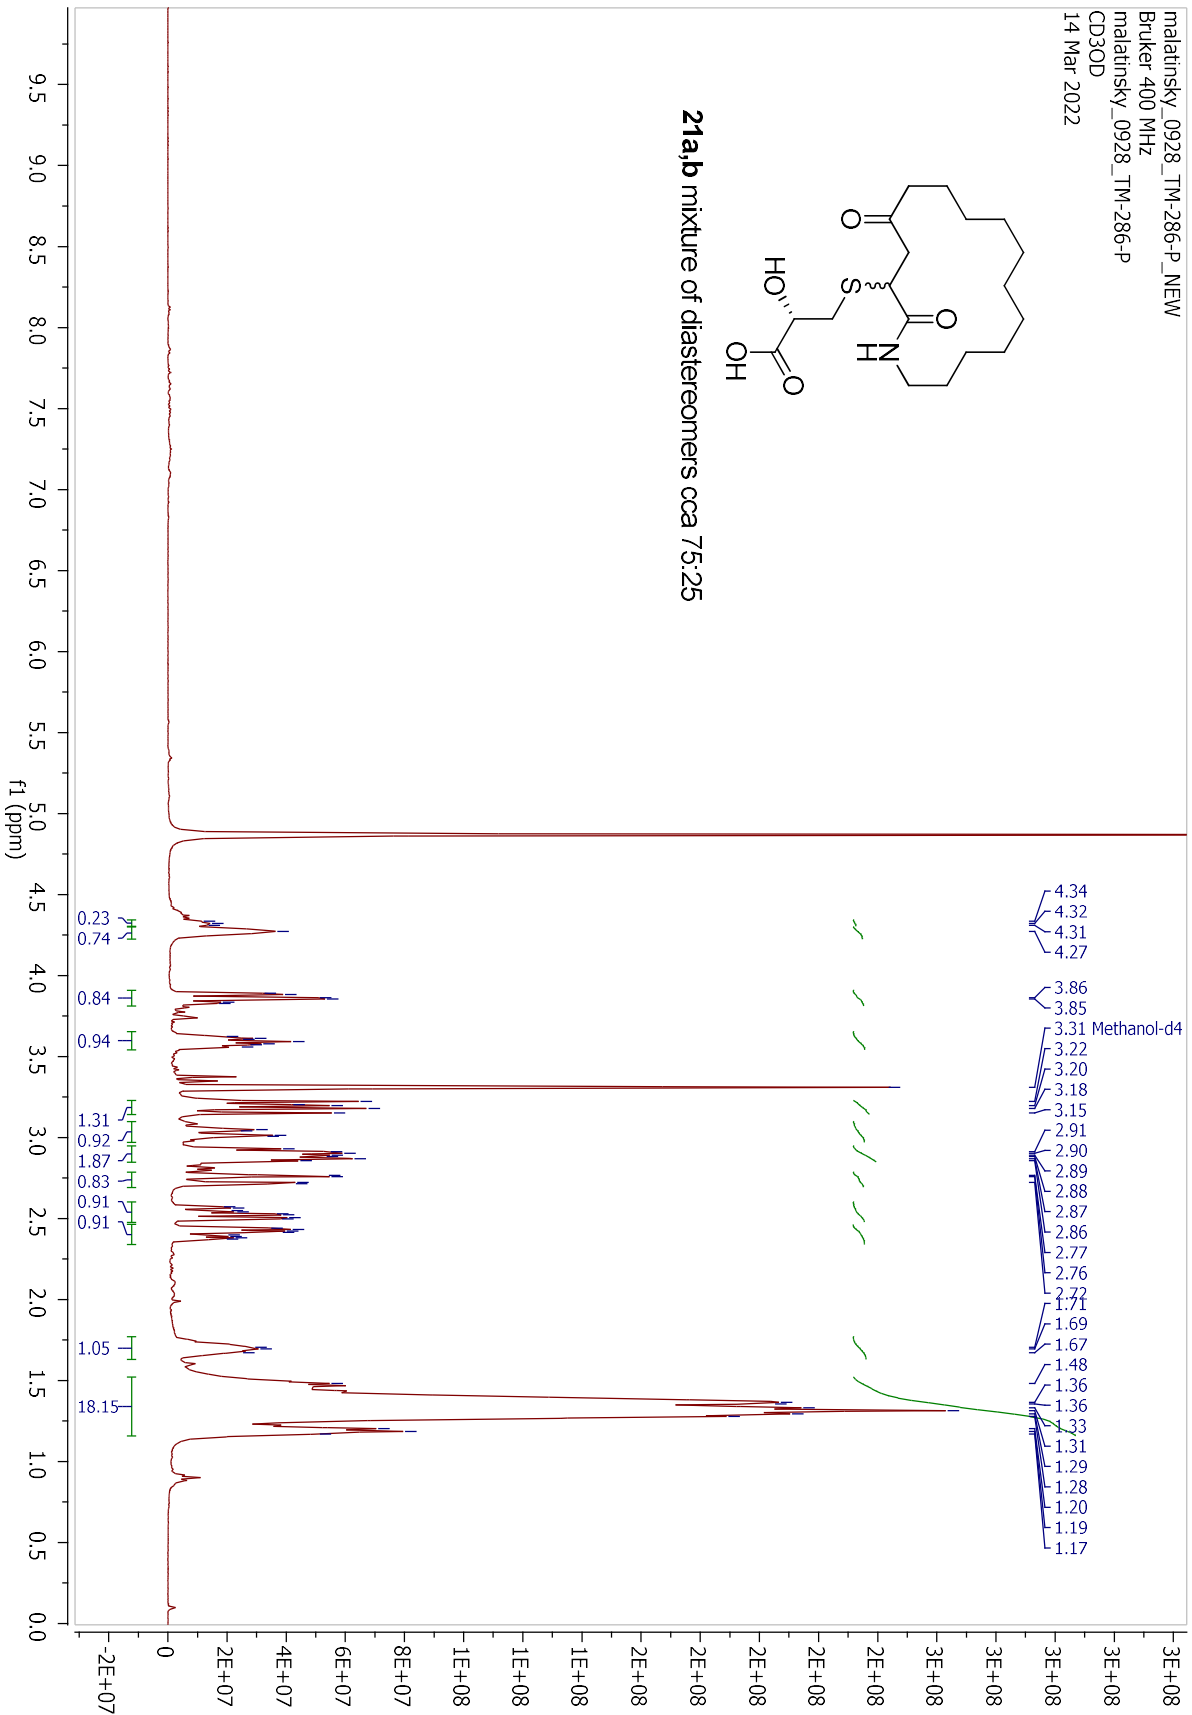

malatinsky\_0928\_TM-286-P\_NEW  
Bruker 400 MHz  
malatinsky\_0928\_TM-286-P  
CD3OD  
14 Mar 2022

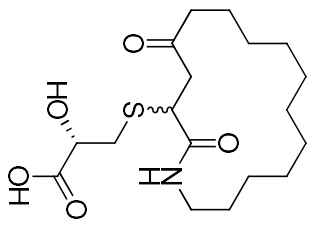

**21a,b** mixture of diastereomers cca 75:25

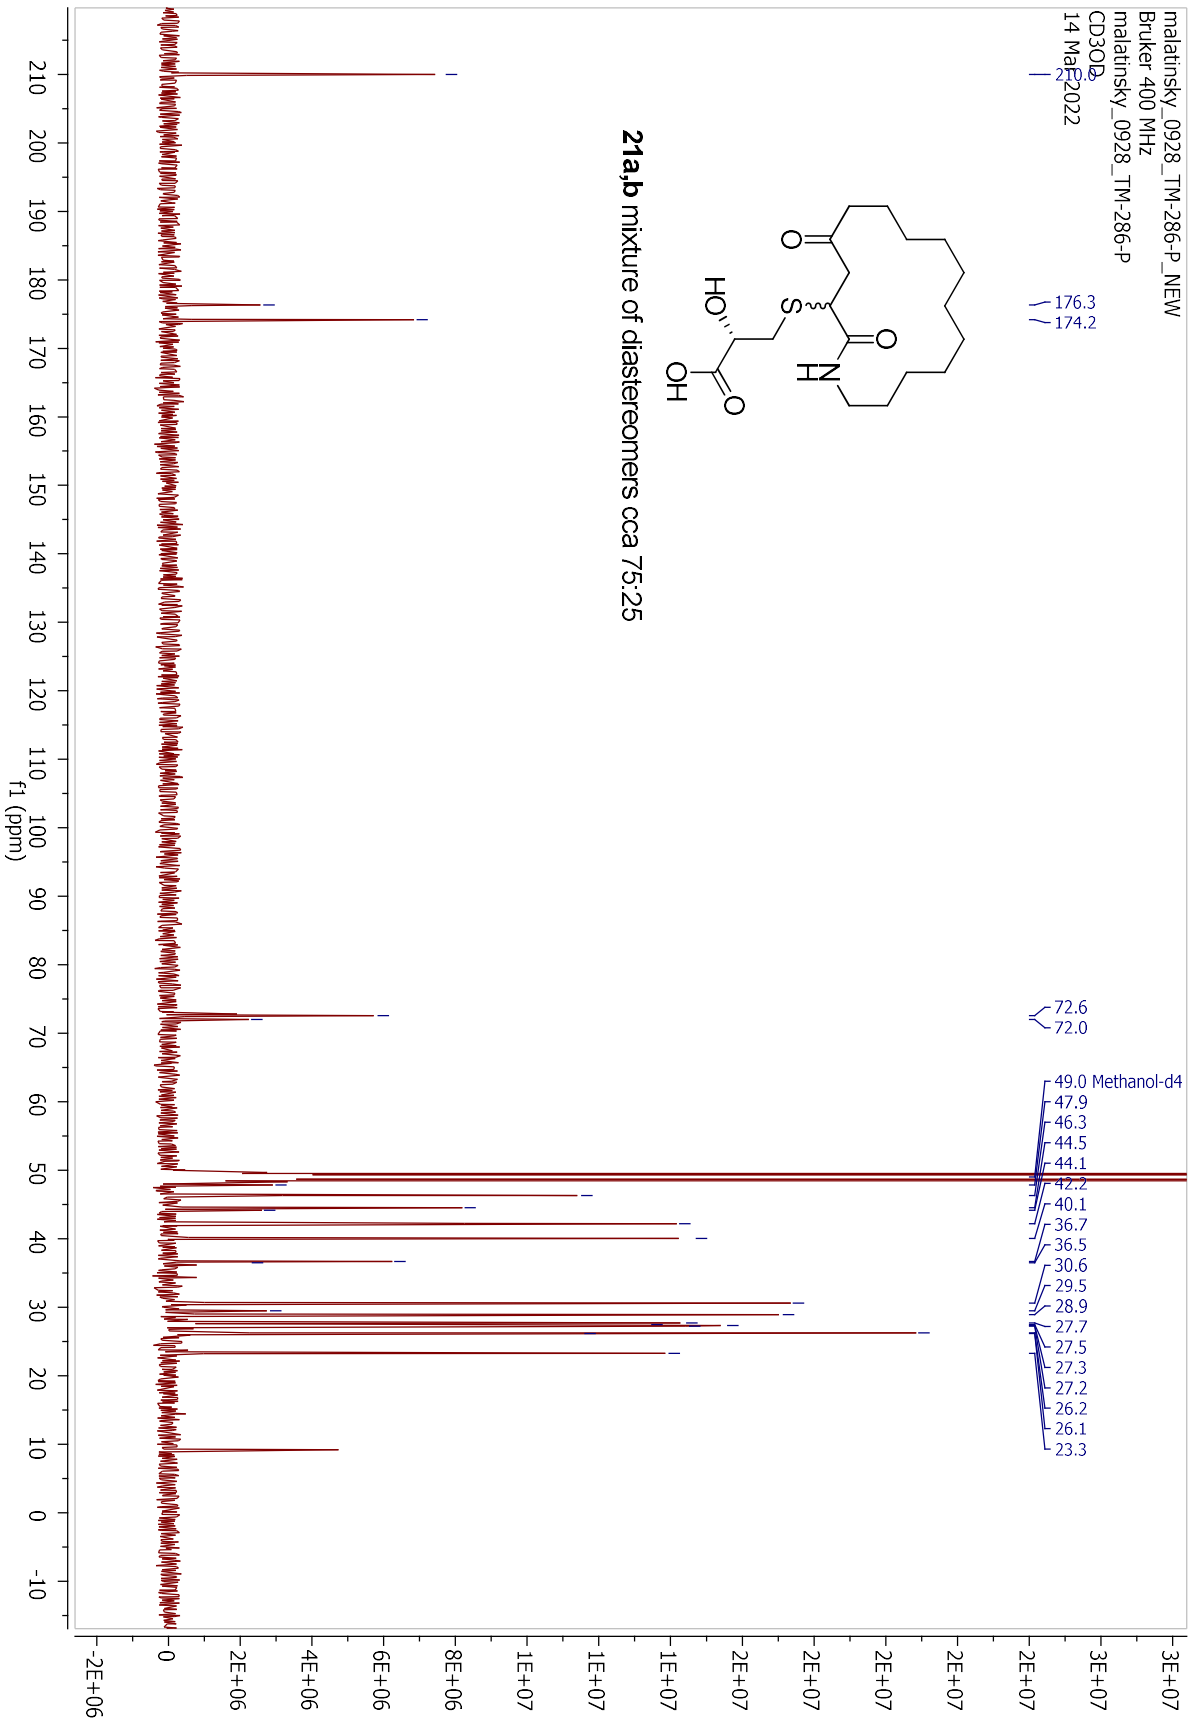

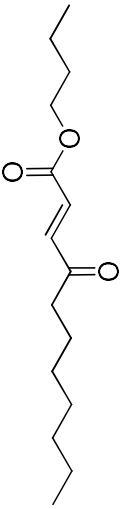

22

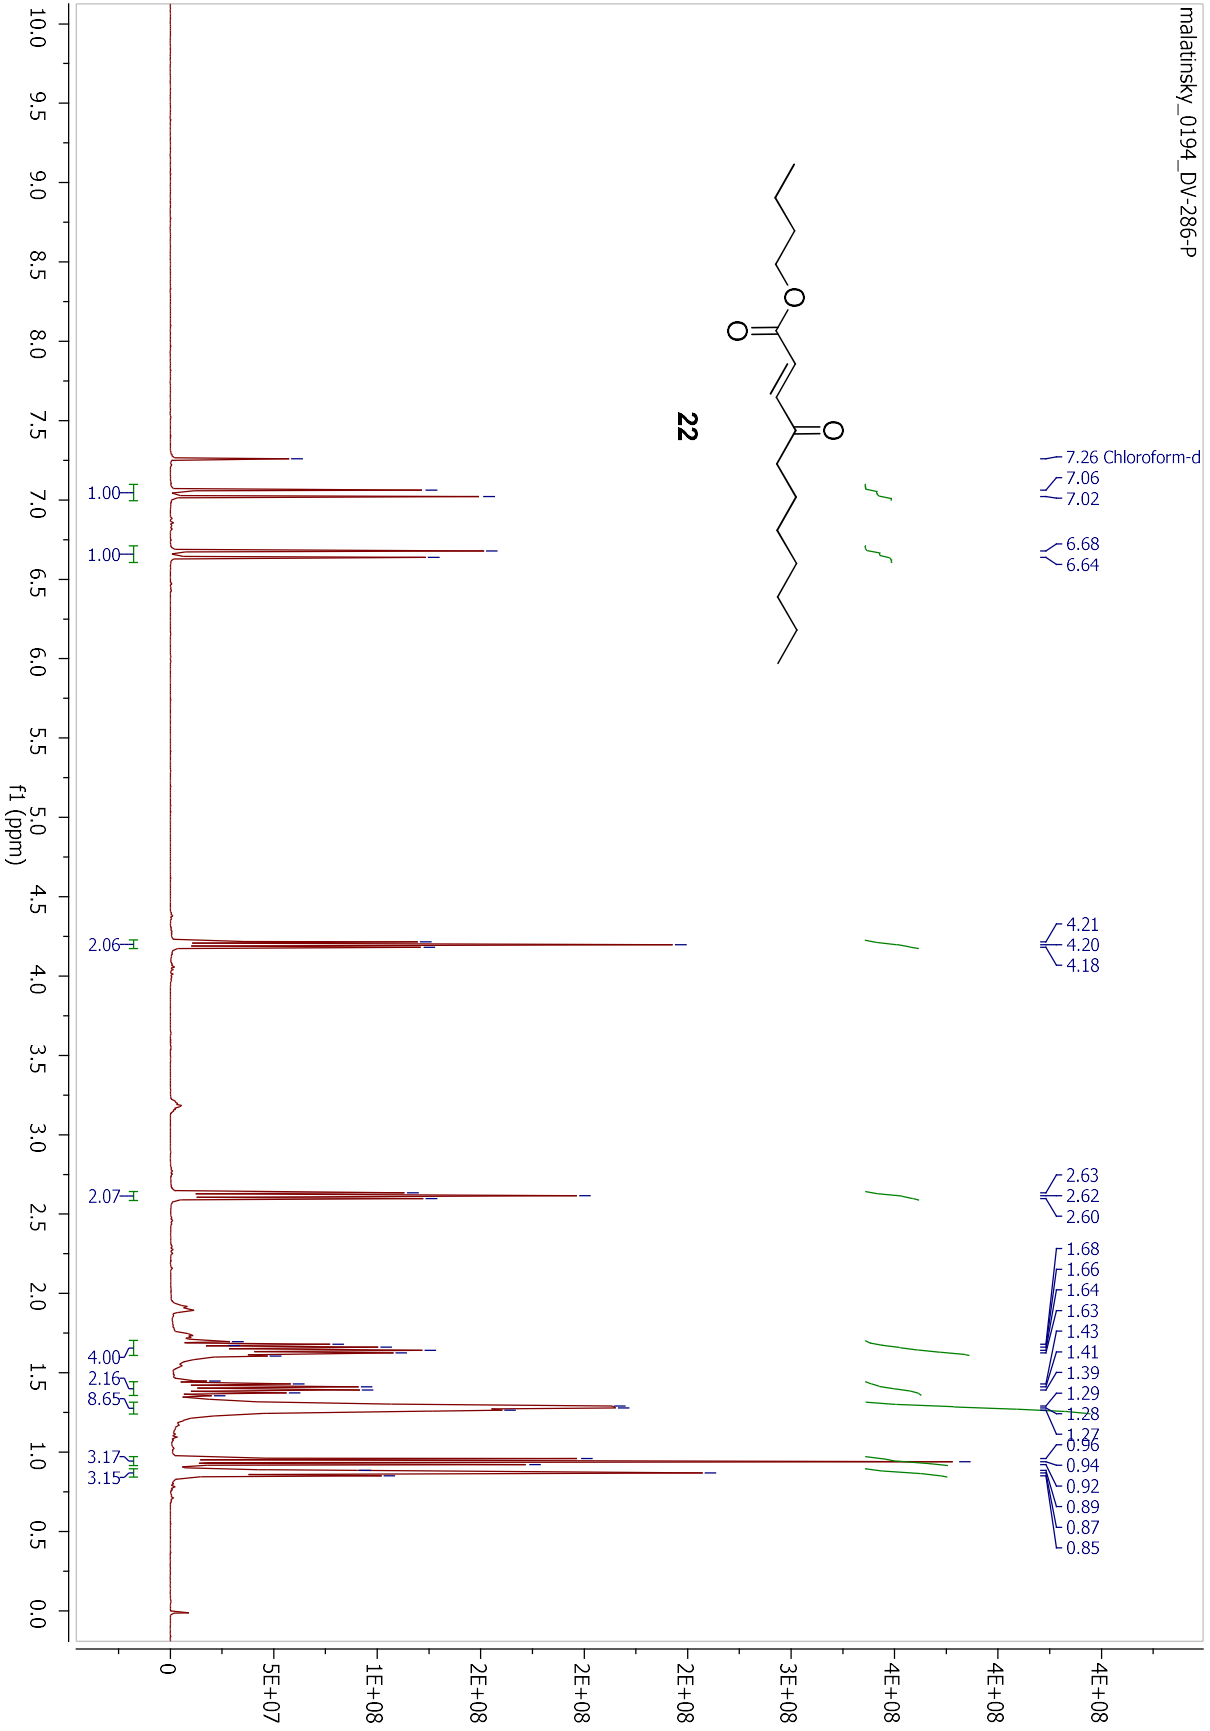



malatinsky\_0965\_DV-286-P-1  
Bruker 400 MHz  
malatinsky\_0965\_DV-286-P-1  
CDCl3  
16 Mar 2022

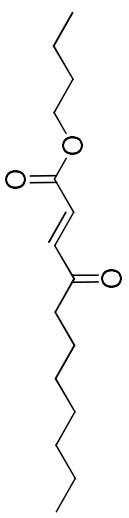

22

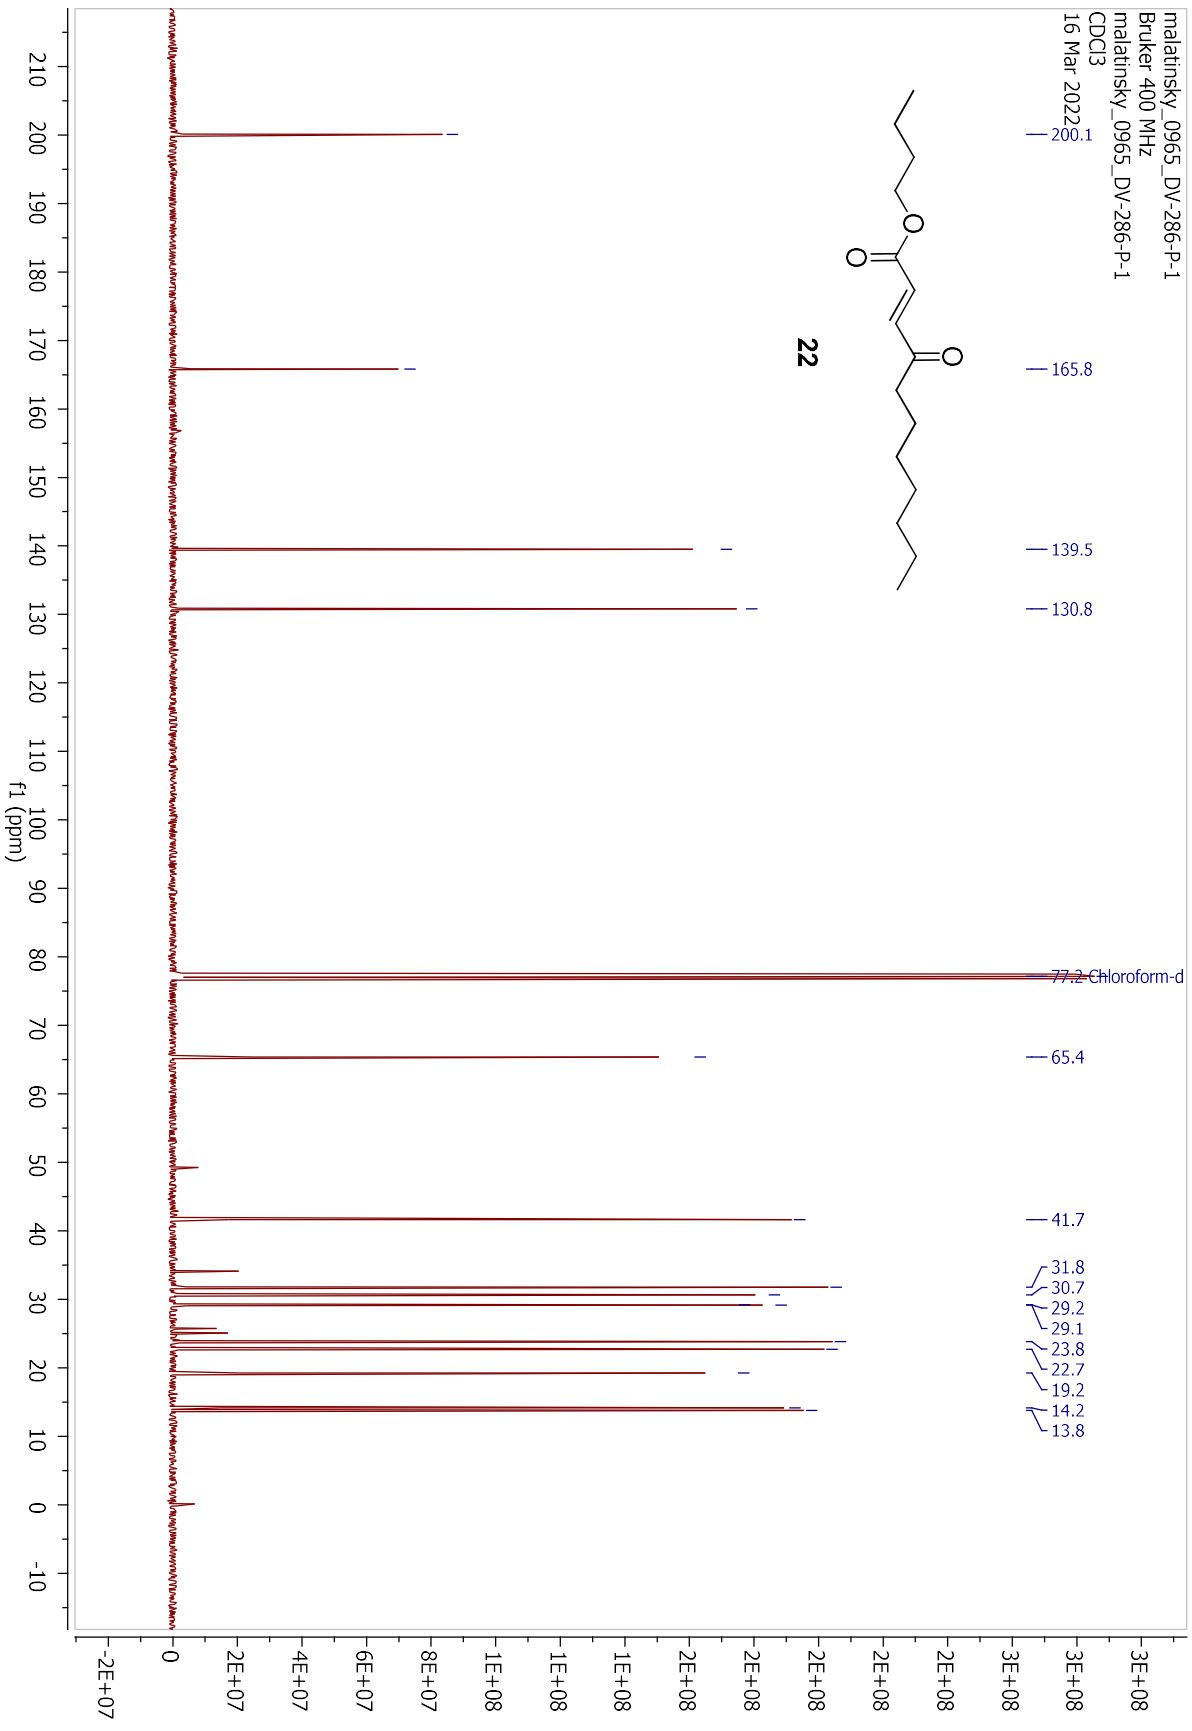

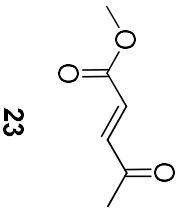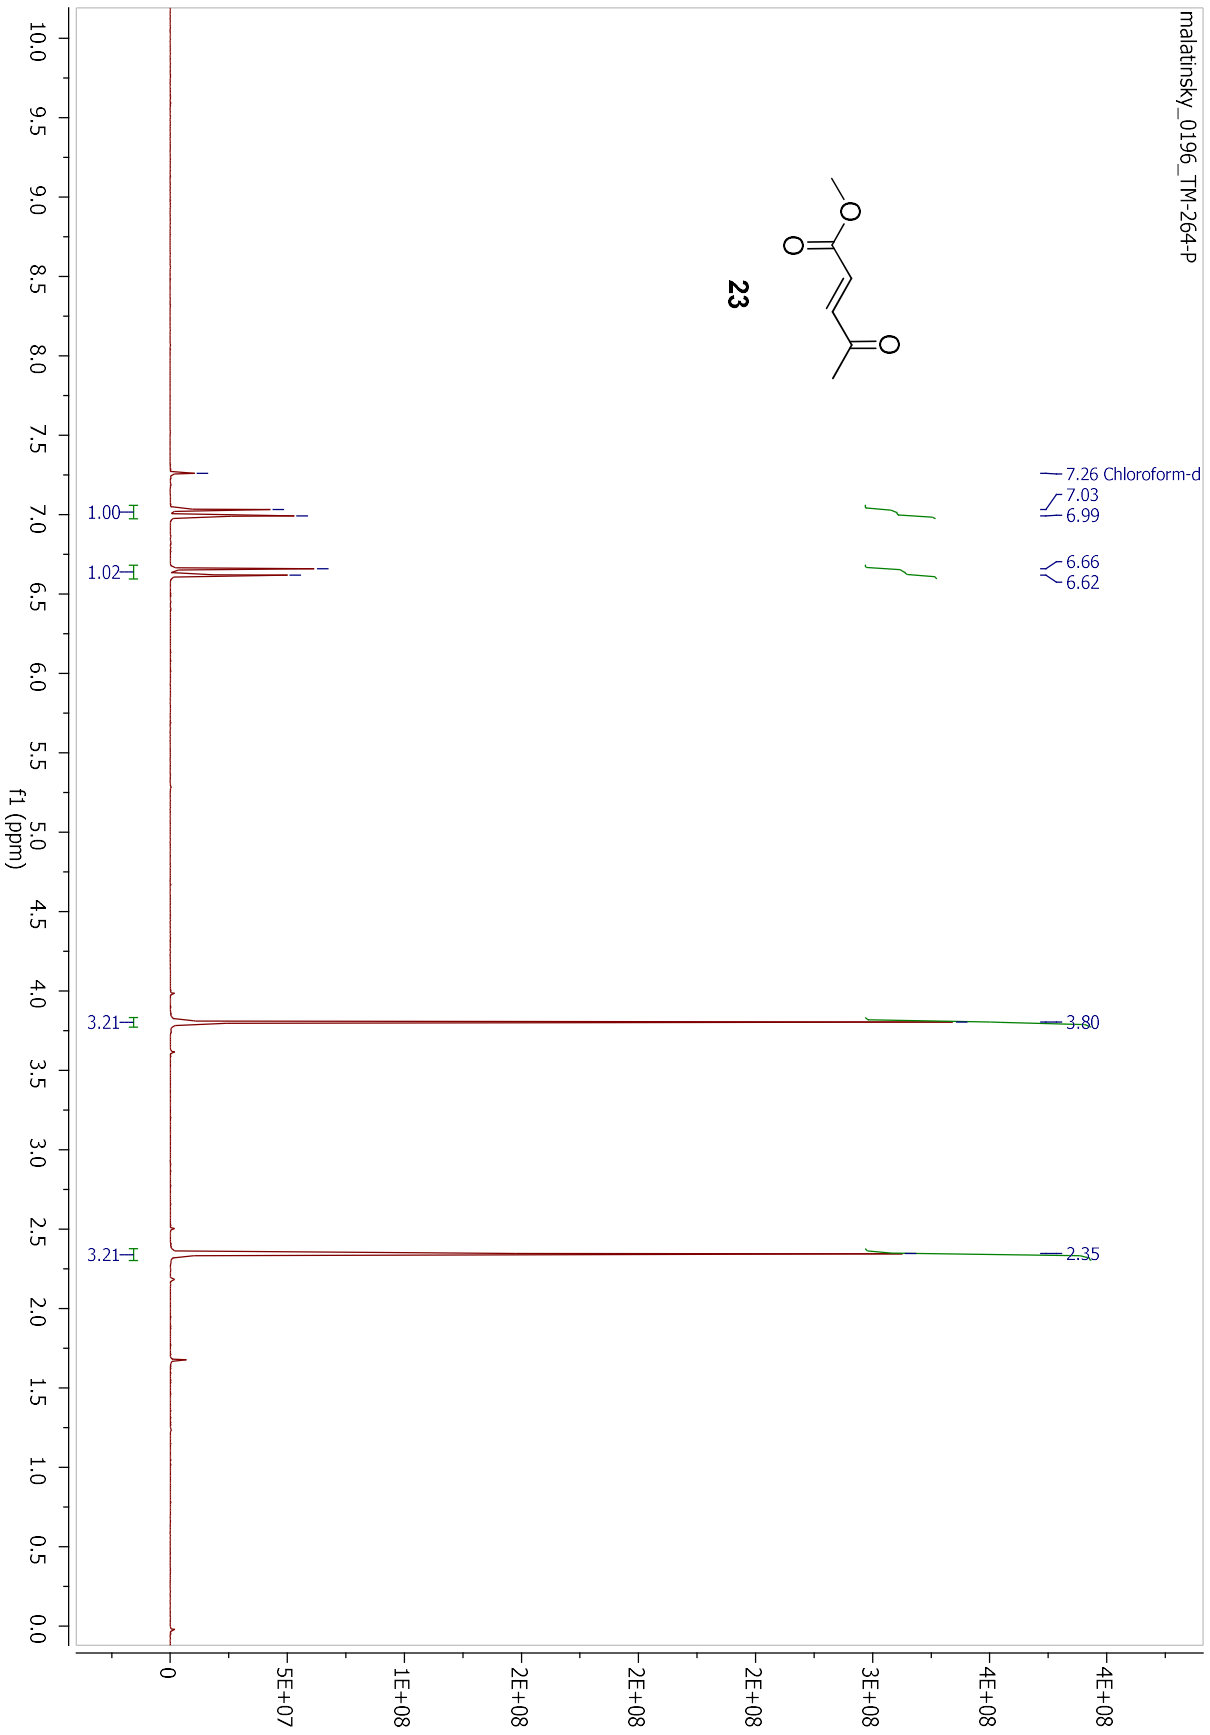

malatinsky\_0196\_TM-264-P

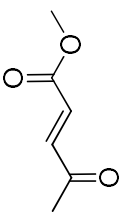

23

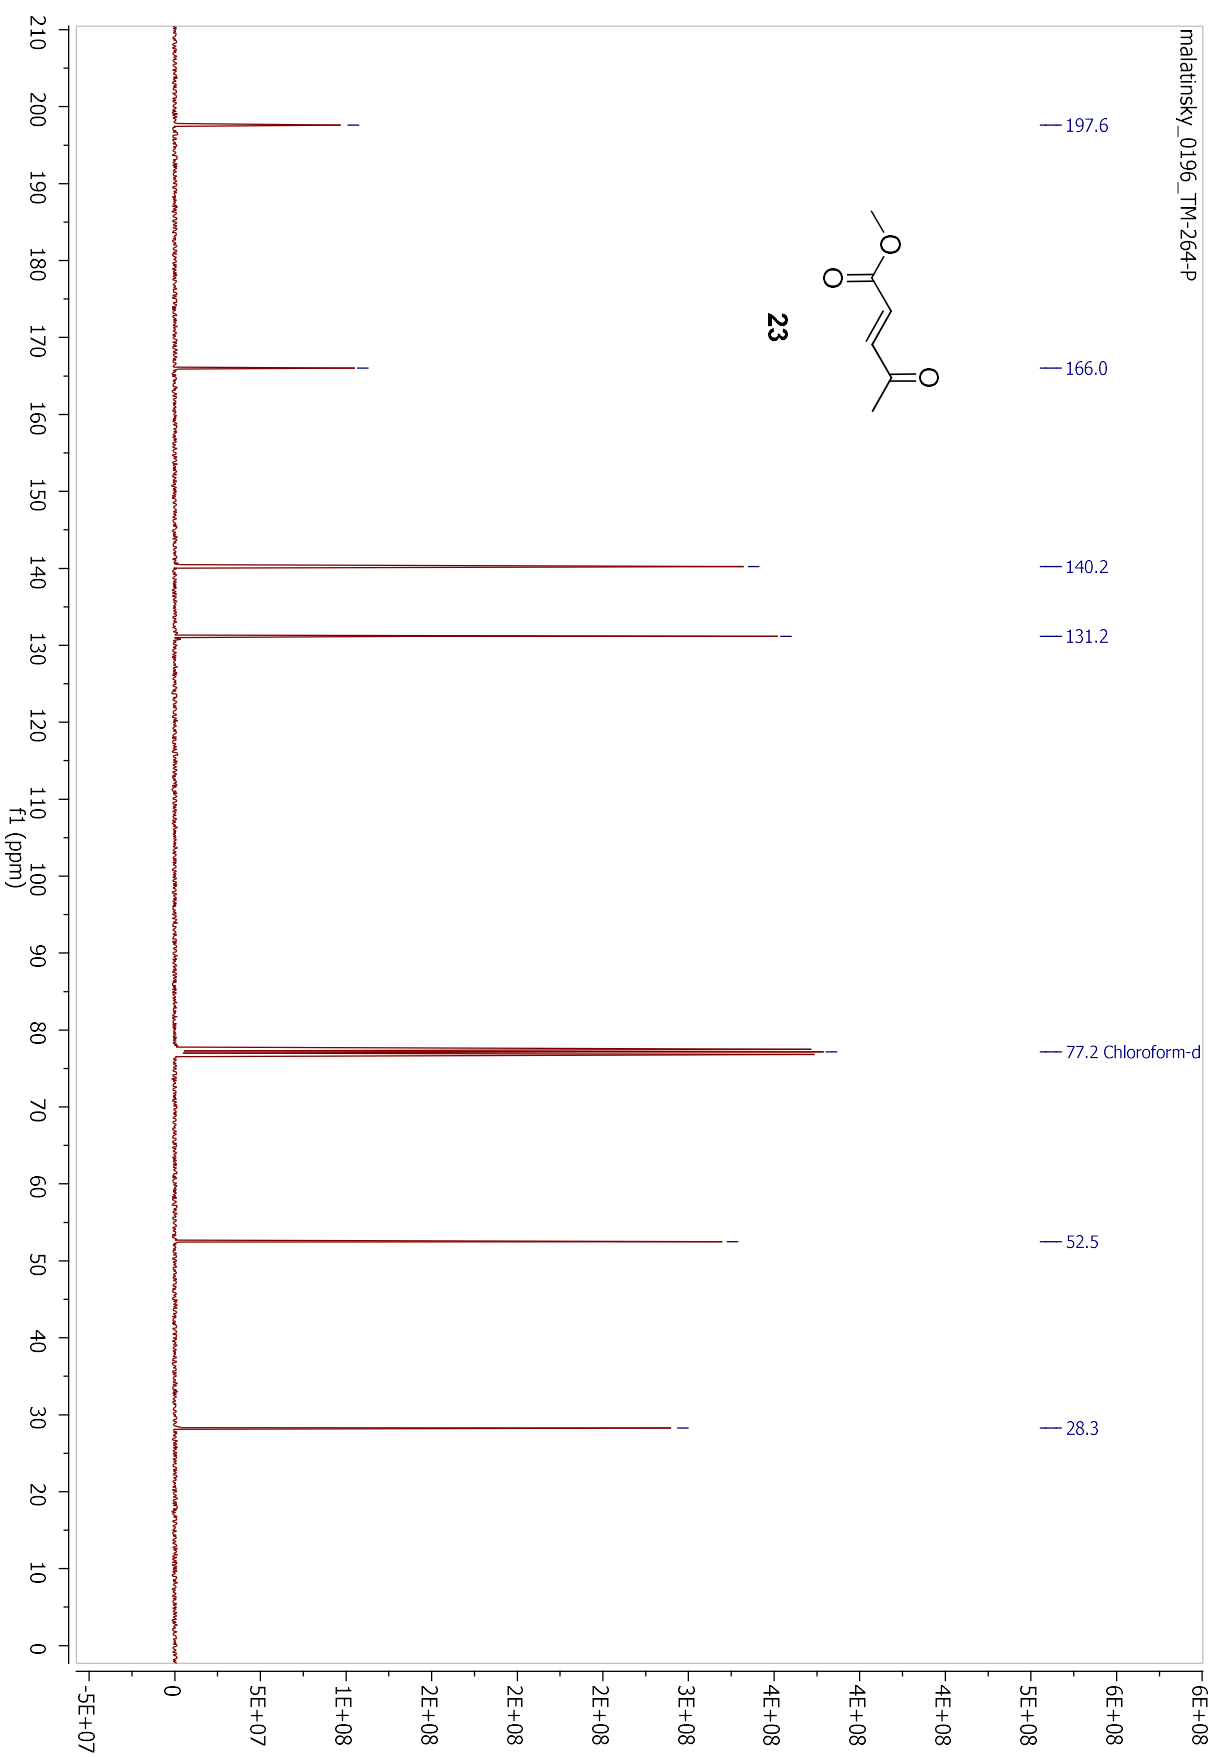

jakubec2345hdbx\_DV-268\_fr2-5  
jakubec 2345 DV-268 fr.2-5 1H dbx

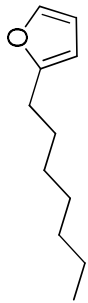

25

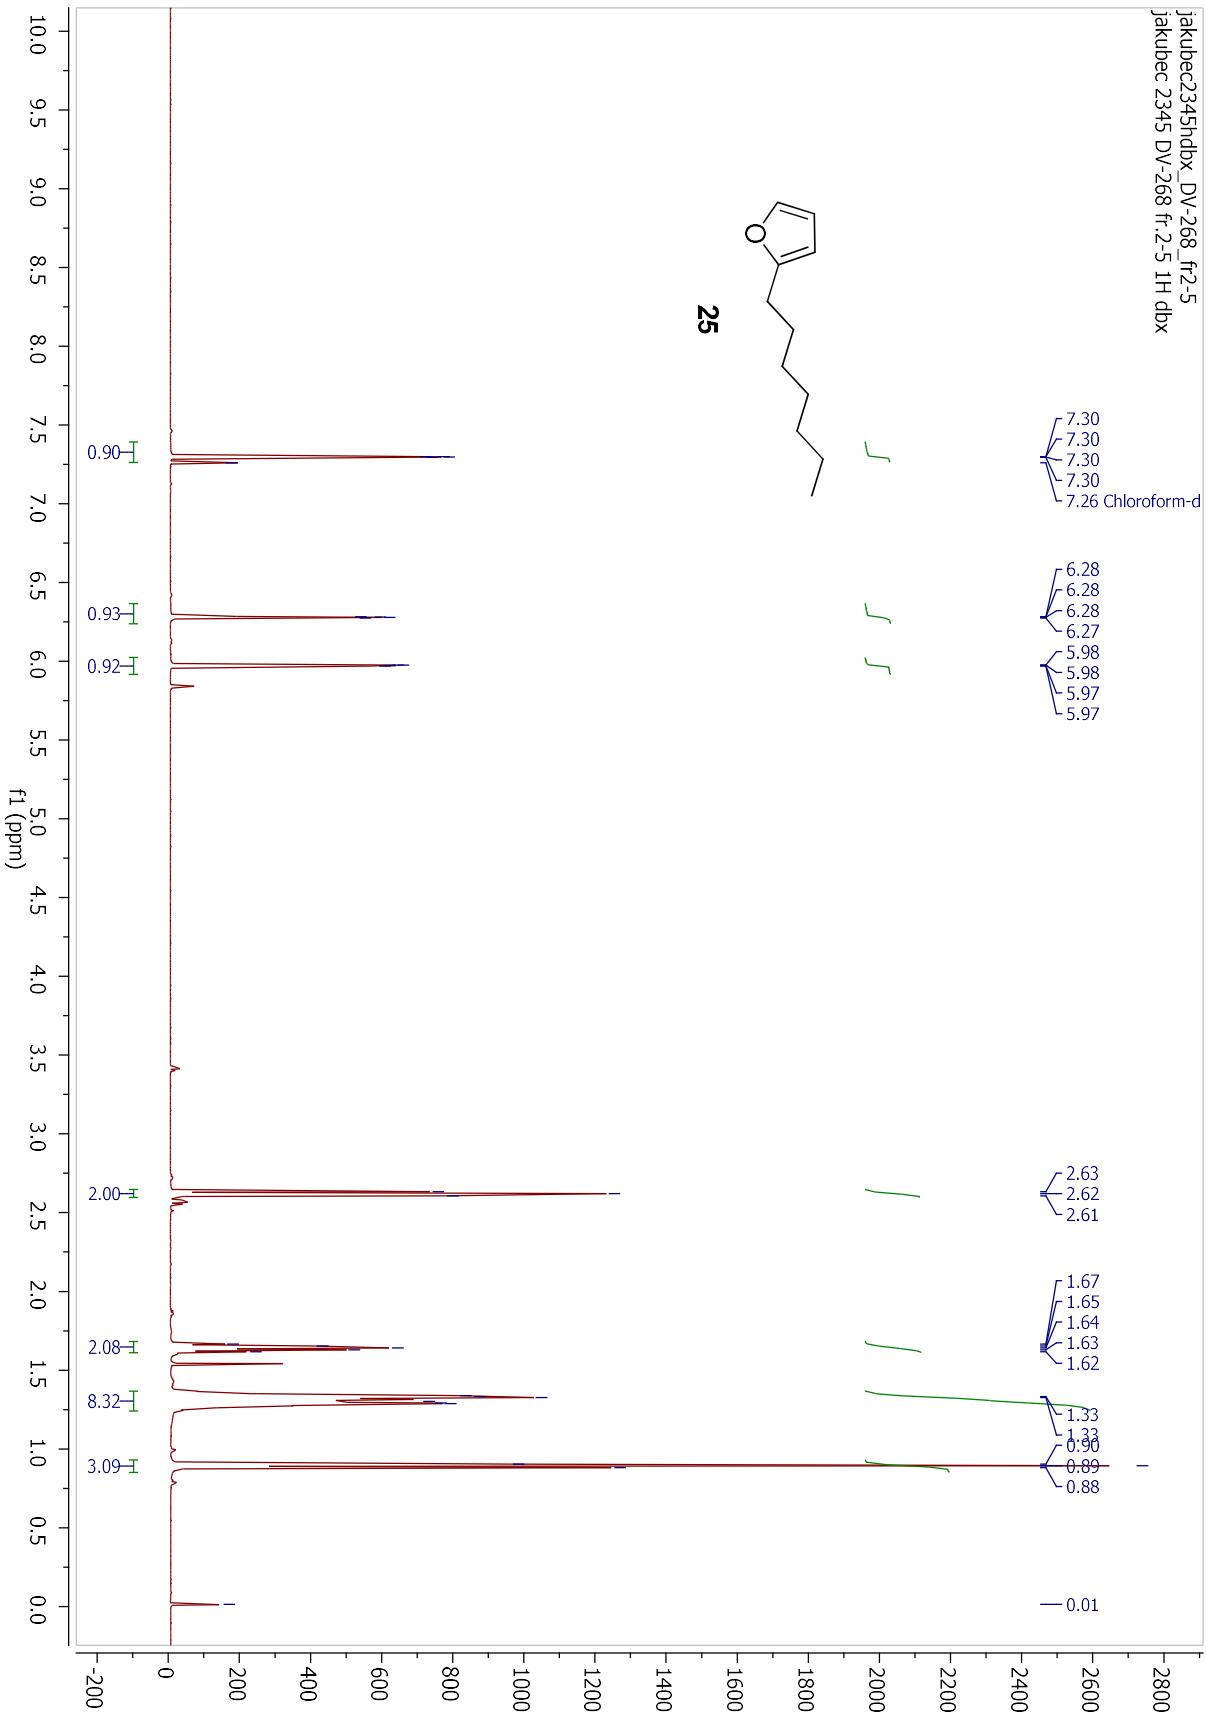

jakubec2386hdbx\_DV-271  
jakubec 2386 DV-271 1H dbx

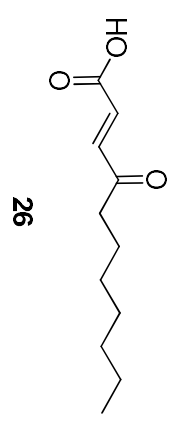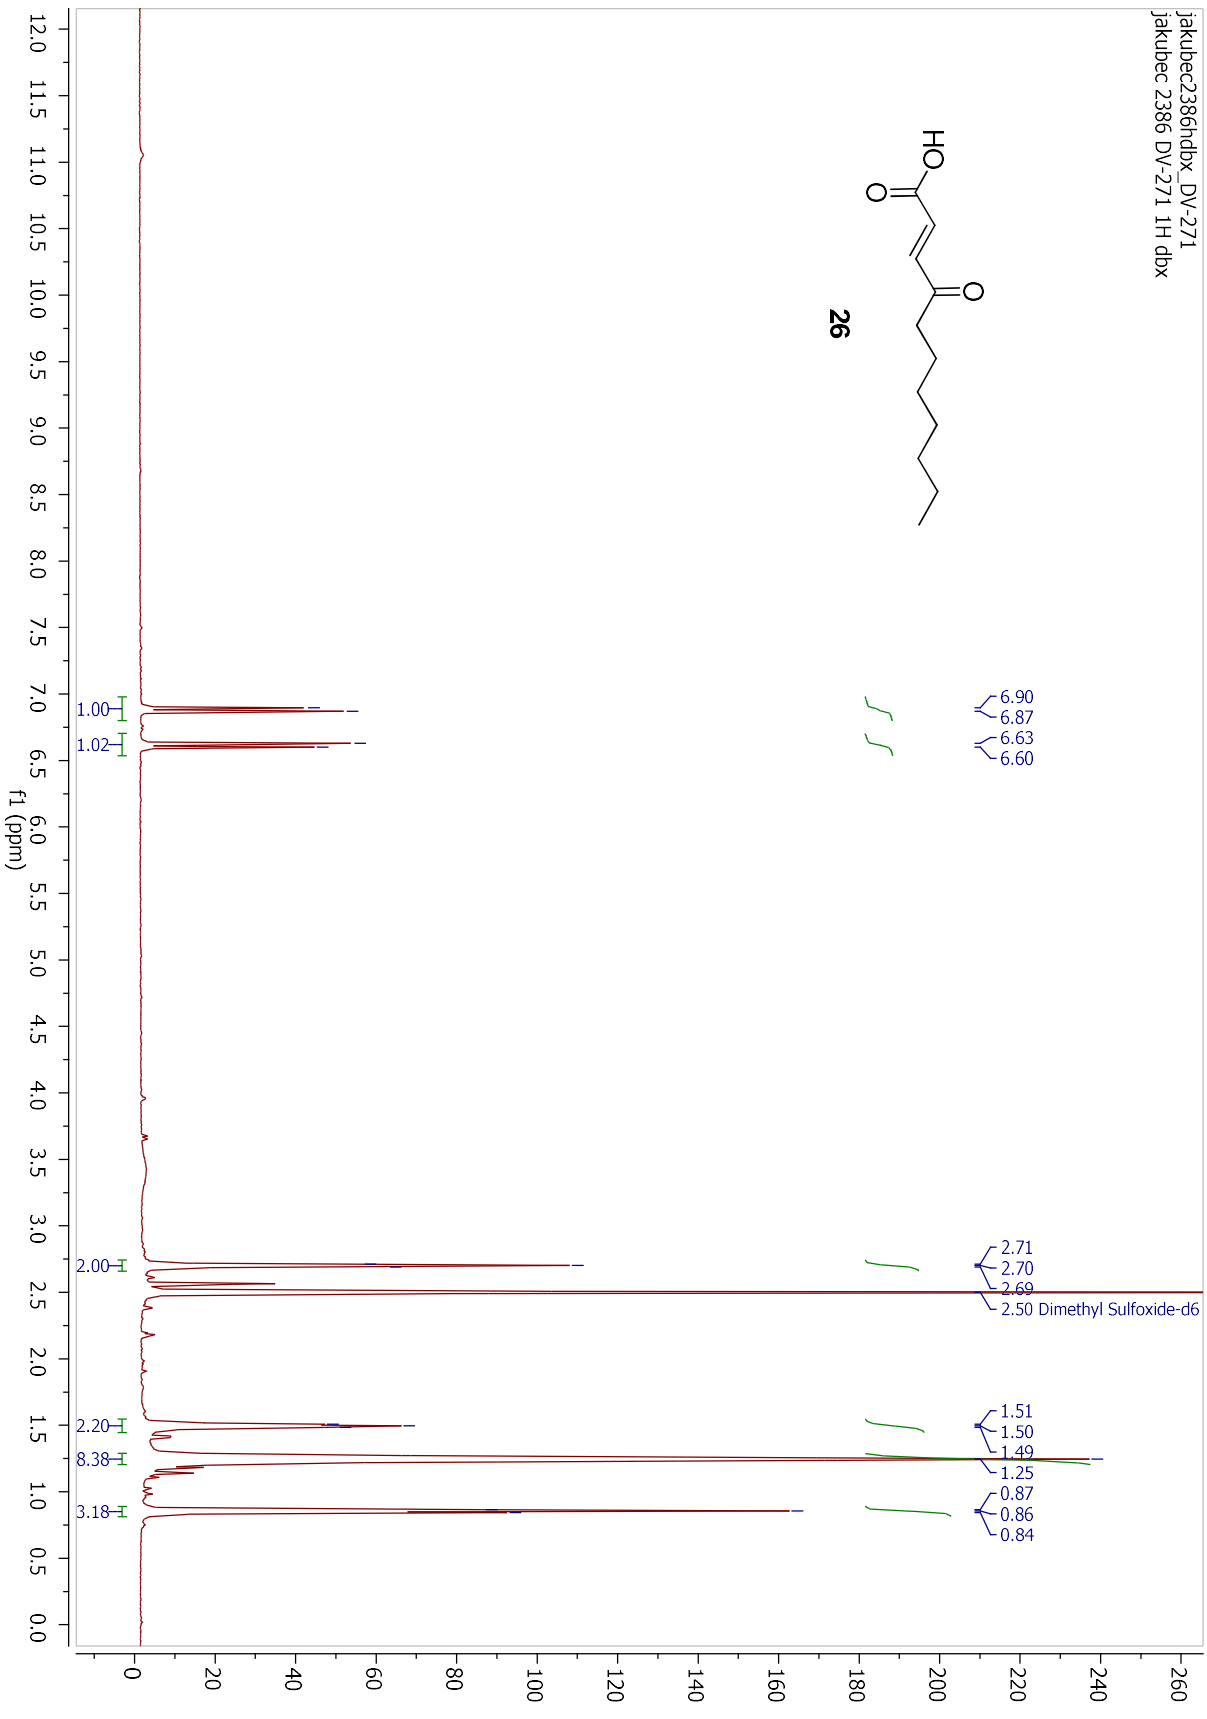

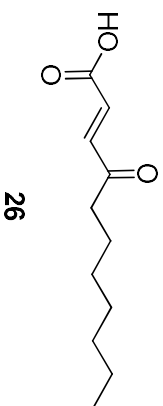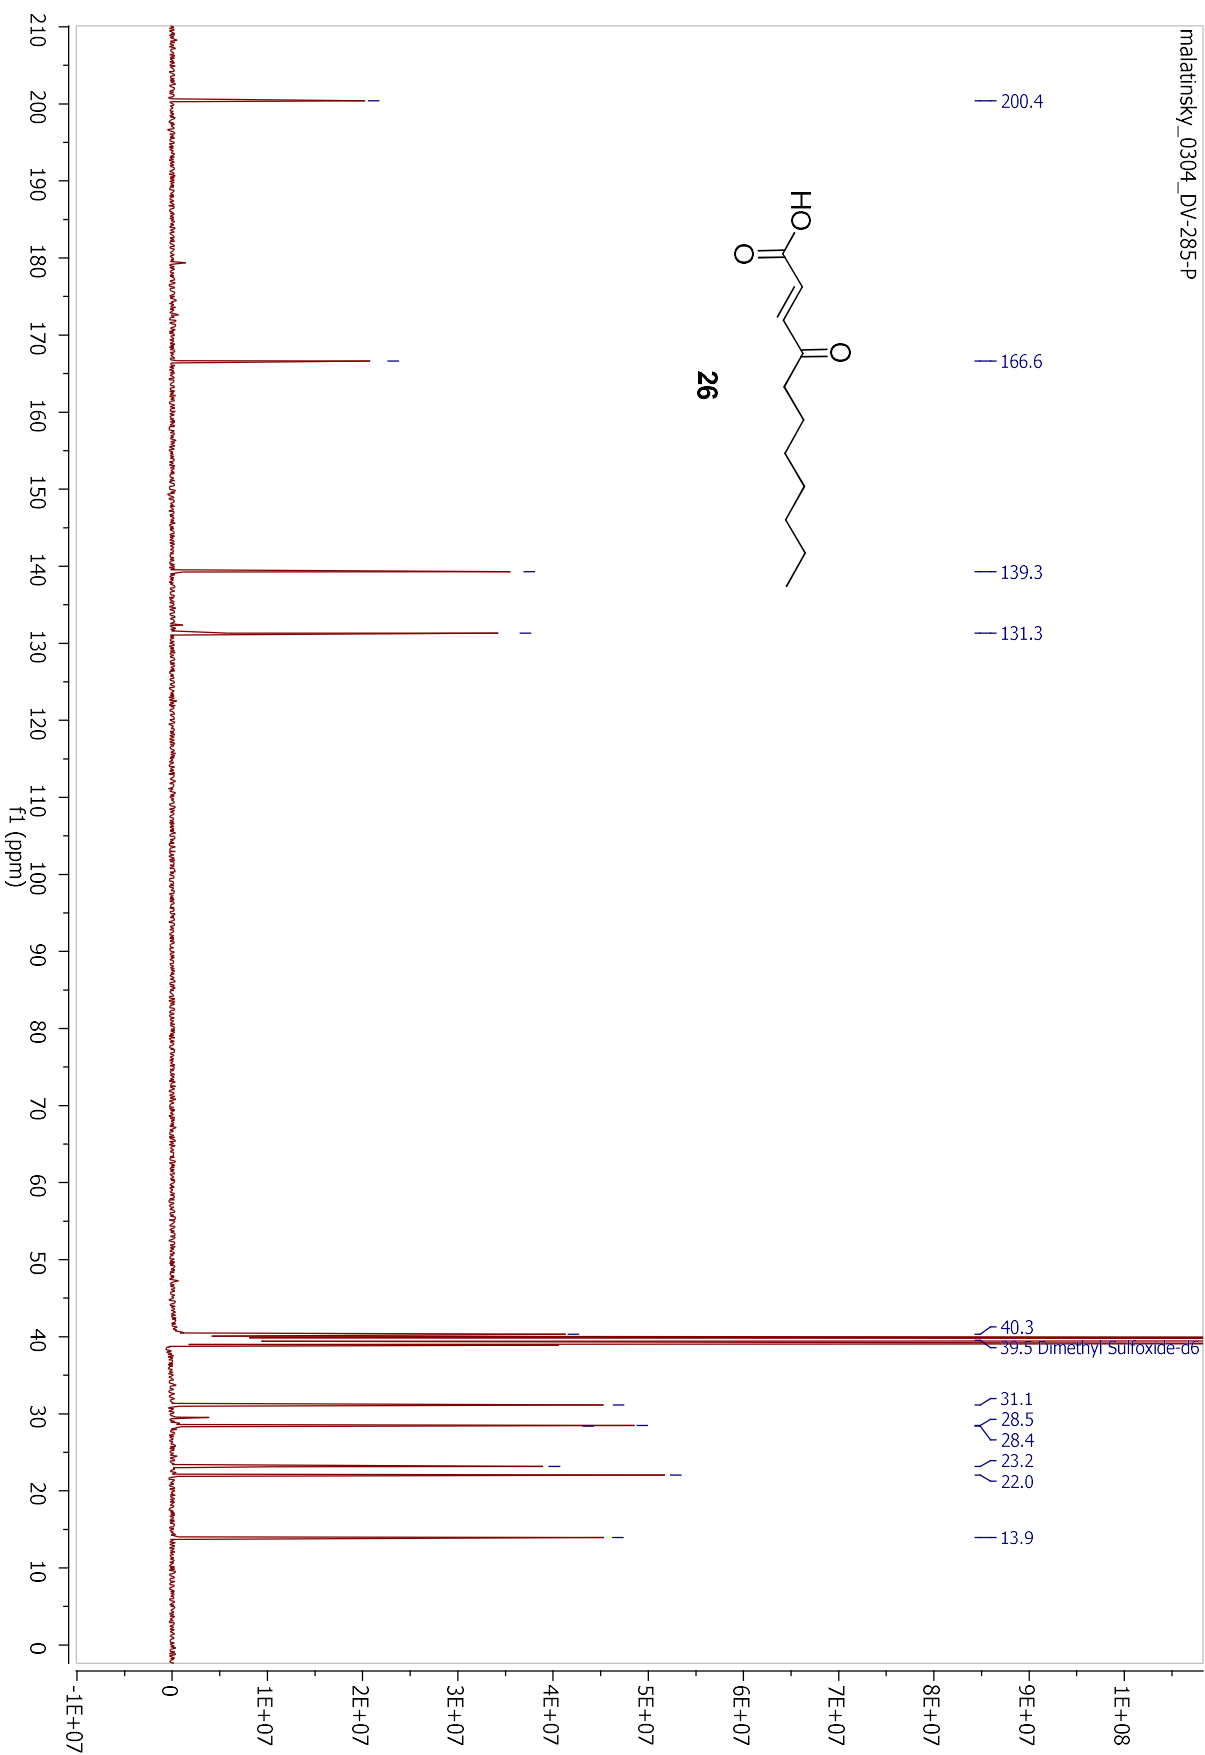

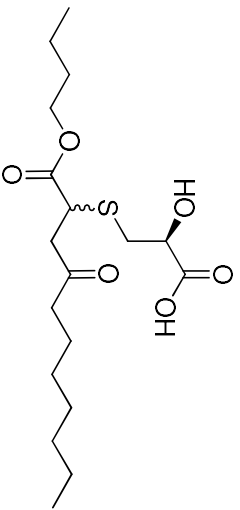

27a,b mixture of diastereomers cca 50:50

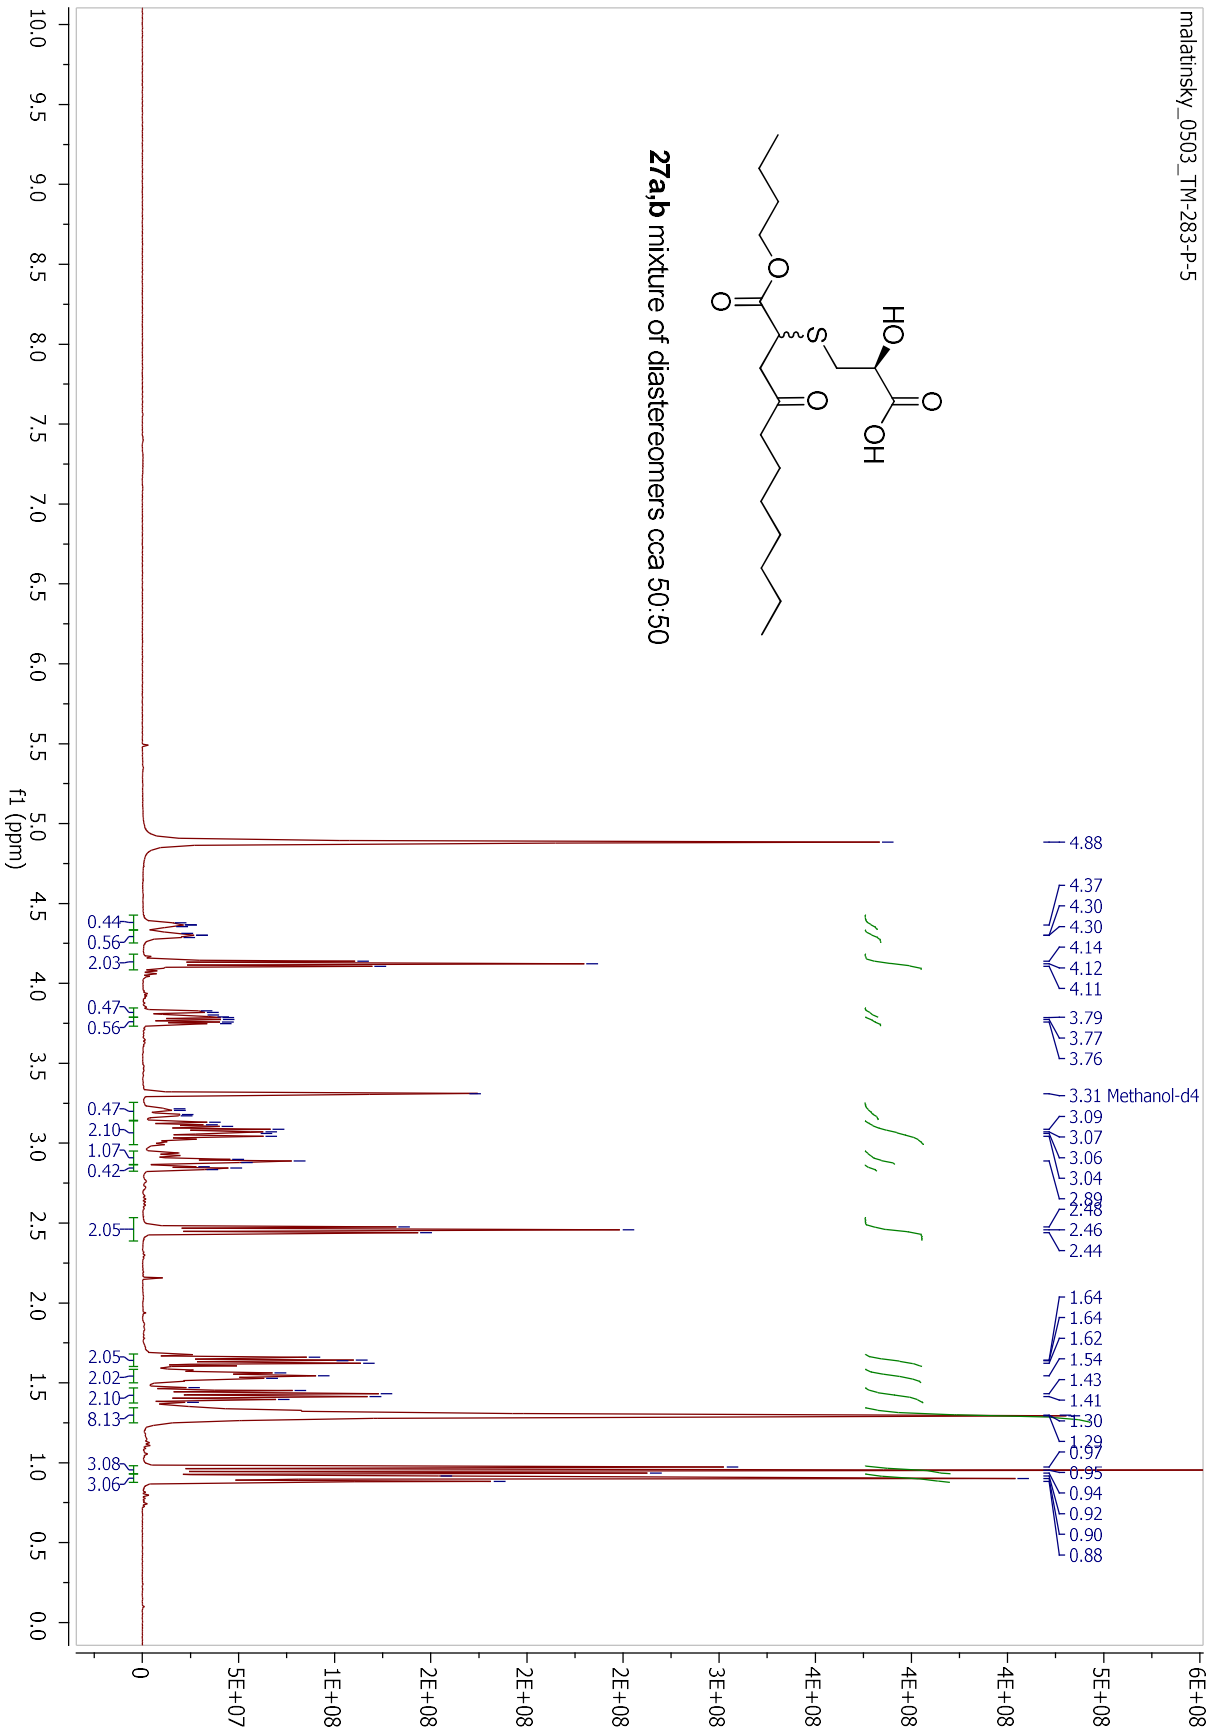

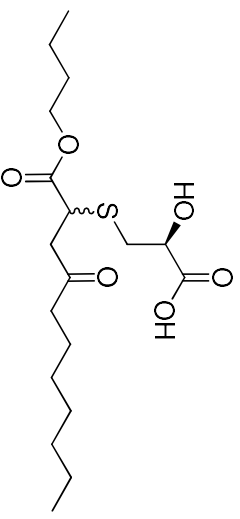

27a,b mixture of diastereomers cca 50:50

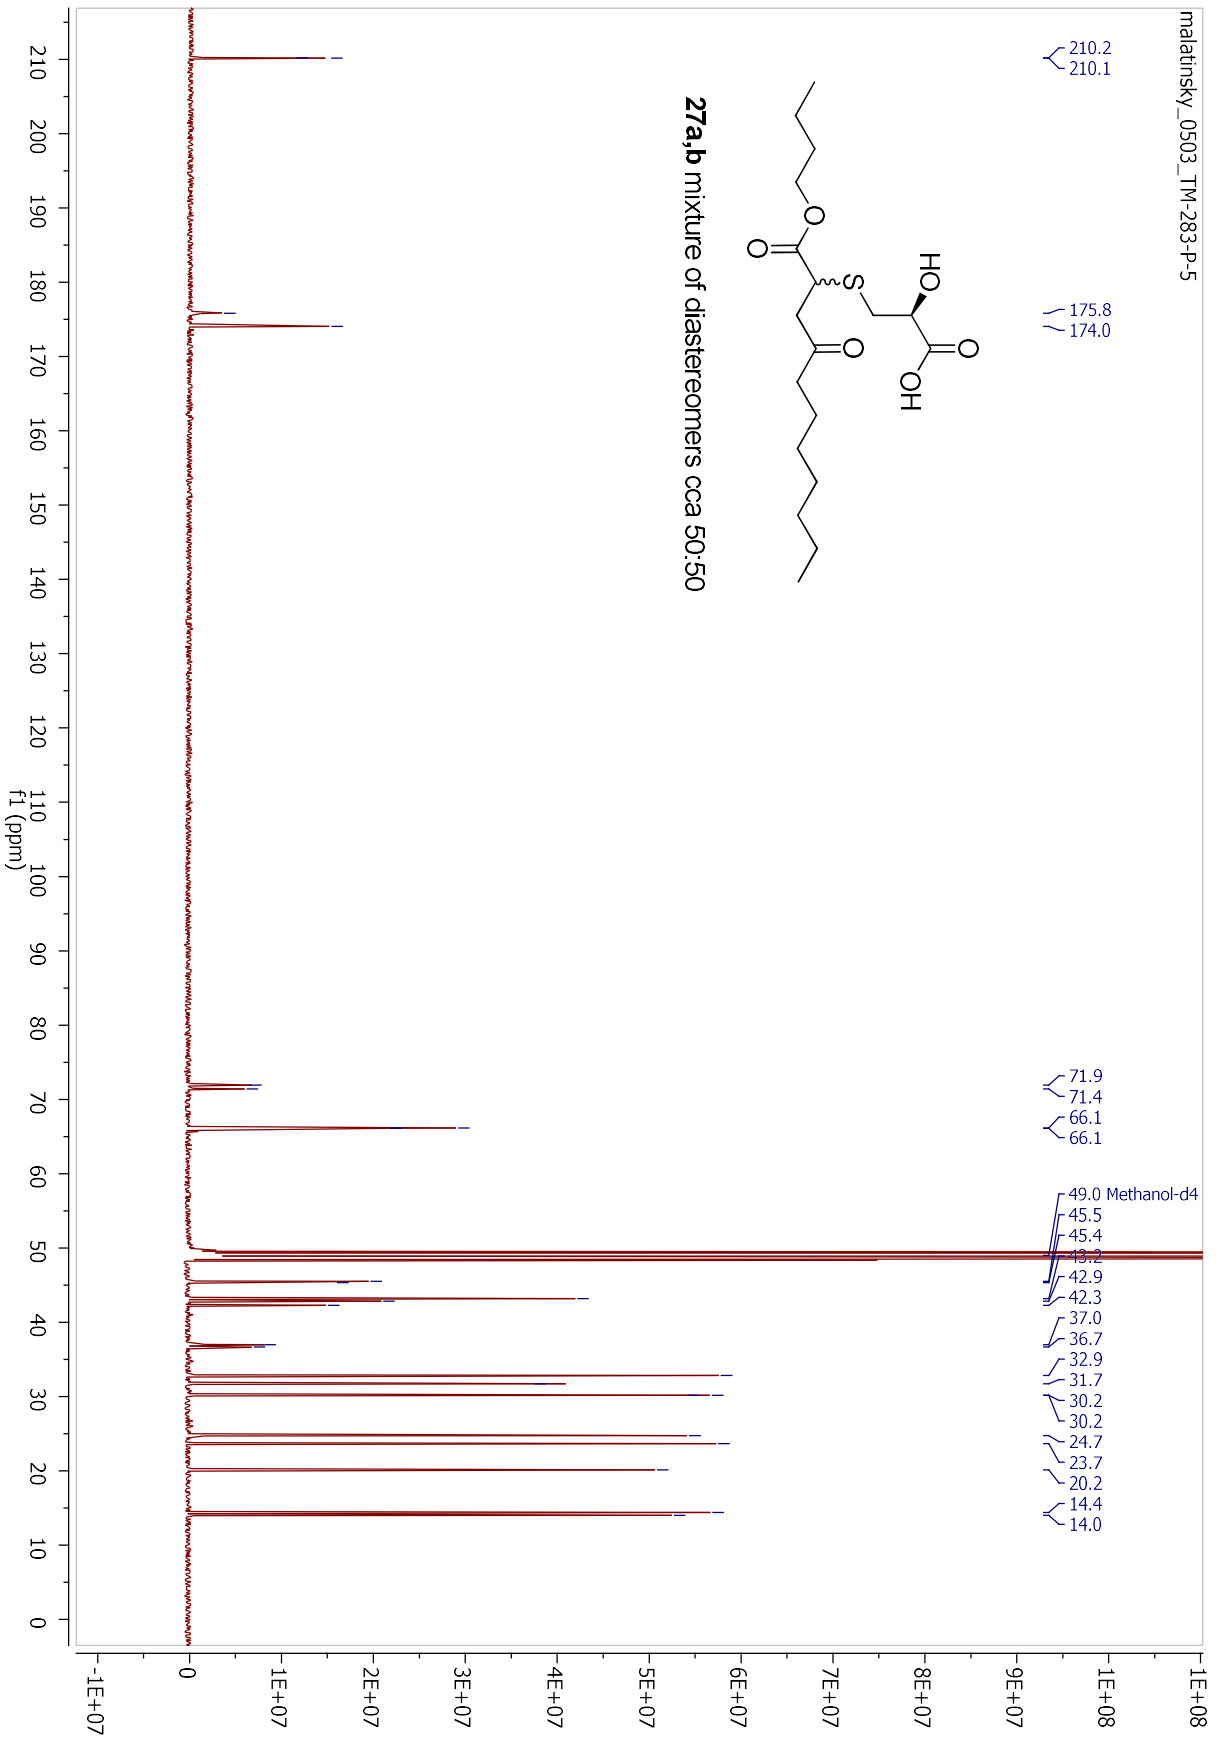



malatinsky\_0297\_TM-266-P  
Bruker 400 MHz  
malatinsky\_0297\_TM-266-P  
CD3OD  
31 Jan 2022

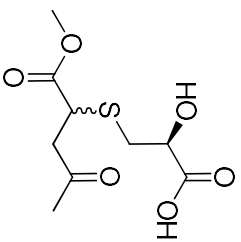

**28a,b** mixture of diastereomers cca 50:50

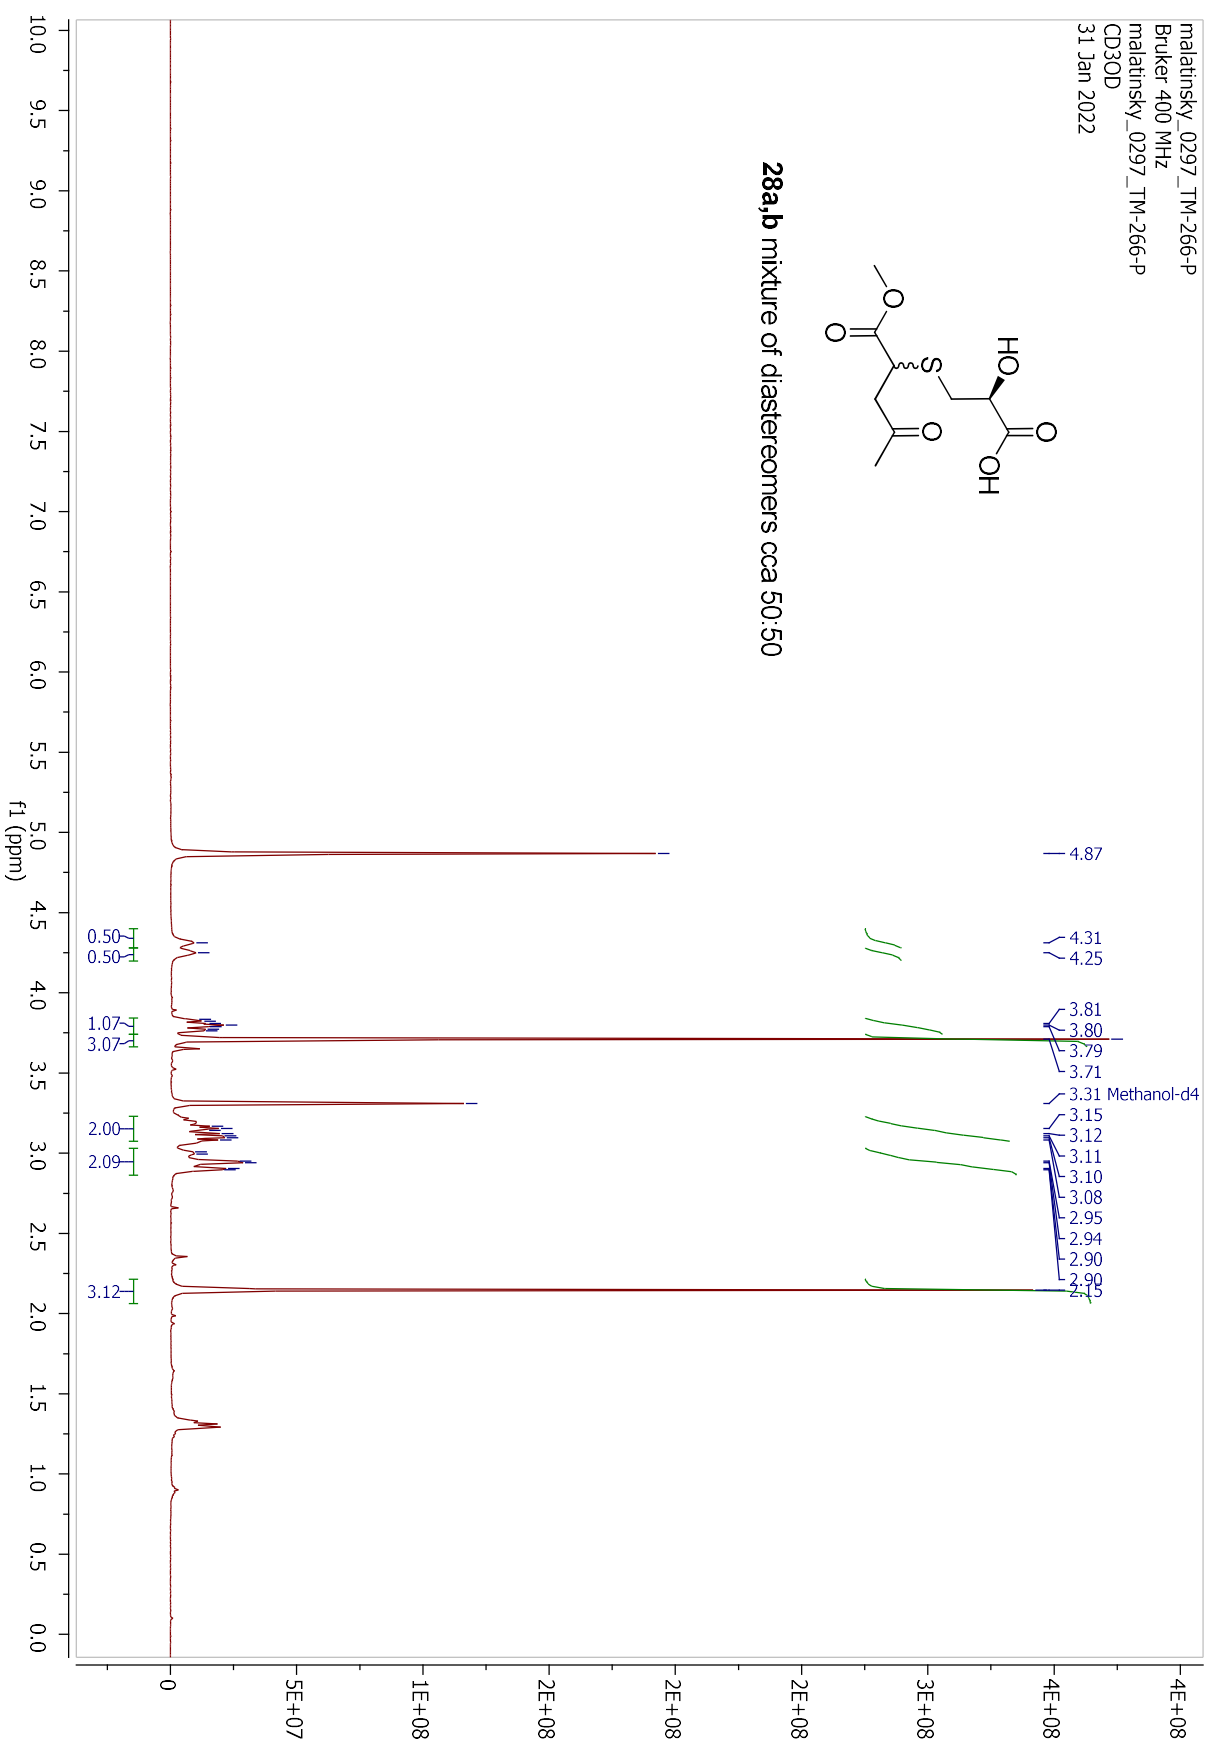

malatinsky\_0332\_TM-266-P\_carbon  
Bruker 400 MHz  
malatinsky\_0332\_TM-266-P  
CD3OD  
3 Feb 2022

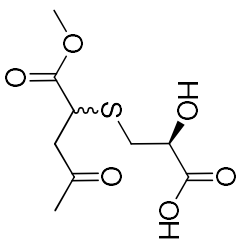

**28a,b** mixture of diastereomers cca 50:50

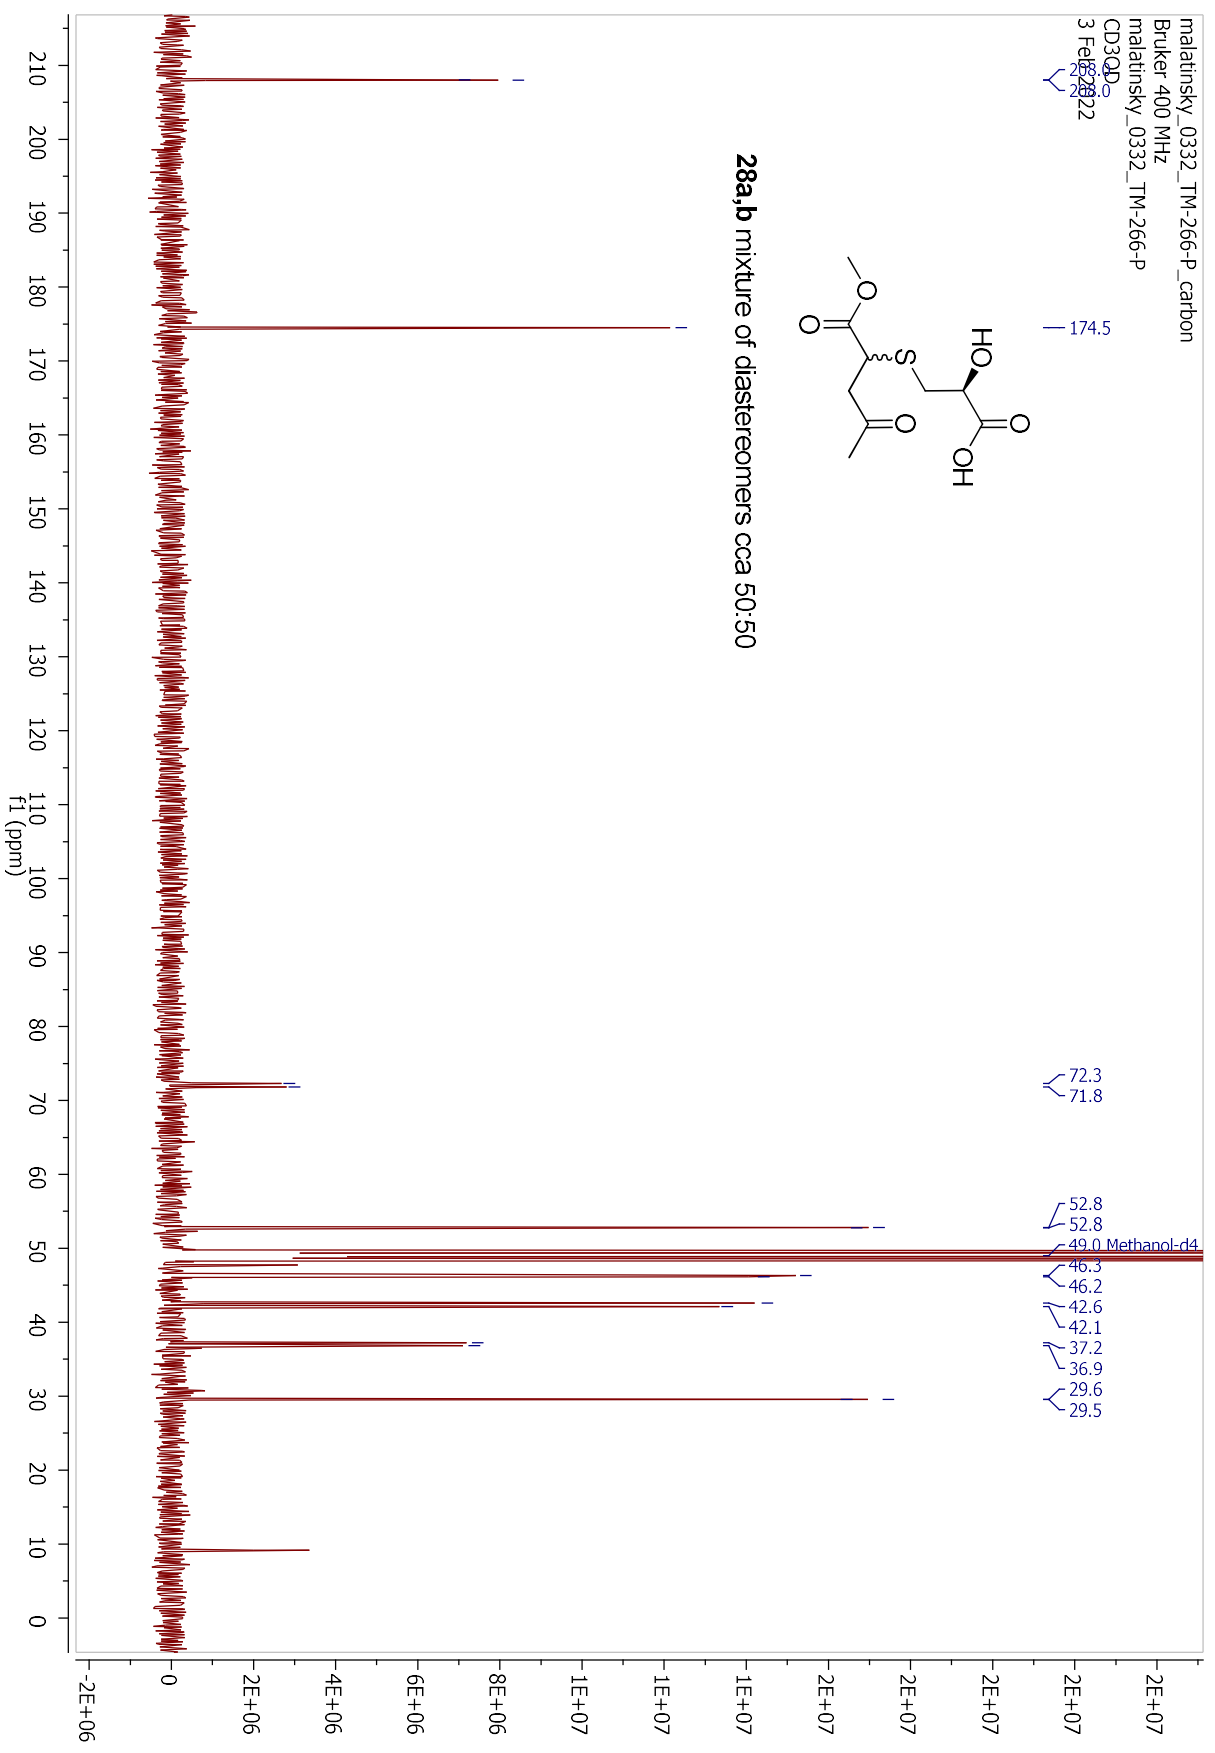

Supplement: d2ob01452a1.pdf [file d2ob01452a1.pdf]
